# Supplementary material for: Risk of 30-day hospital readmission associated with medical conditions and drug regimens of polymedicated, older inpatients discharged home: a registry-based cohort study
Source: PubMed Central journal article supplement (PMC8281082; doi:10.1136/bmjopen-2021-052755), 2021-07-14
Supplement: bmjopen-2021-052755.draft_revisions.pdf [file bmjopen-2021-052755.draft_revisions.pdf]

# BMJ Open

BMJ Open is committed to open peer review. As part of this commitment we make the peer review history of every article we publish publicly available.

When an article is published we post the peer reviewers' comments and the authors' responses online. We also post the versions of the paper that were used during peer review. These are the versions that the peer review comments apply to.

The versions of the paper that follow are the versions that were submitted during the peer review process. They are not the versions of record or the final published versions. They should not be cited or distributed as the published version of this manuscript.

BMJ Open is an open access journal and the full, final, typeset and author-corrected version of record of the manuscript is available on our site with no access controls, subscription charges or pay-per-view fees (<http://bmjopen.bmj.com>).

If you have any questions on BMJ Open's open peer review process please email [info.bmjopen@bmj.com](mailto:info.bmjopen@bmj.com)

# BMJ Open

## A registry-based cohort study of disease- and drug-related 30-day hospital readmissions among polymedicated older inpatients

|                               |                                                                                                                                                                                                                                                                                                                                                                                                                                                                                                                                                                                                                                                                                                                                                                                                                                                                                                                                                               |
|-------------------------------|---------------------------------------------------------------------------------------------------------------------------------------------------------------------------------------------------------------------------------------------------------------------------------------------------------------------------------------------------------------------------------------------------------------------------------------------------------------------------------------------------------------------------------------------------------------------------------------------------------------------------------------------------------------------------------------------------------------------------------------------------------------------------------------------------------------------------------------------------------------------------------------------------------------------------------------------------------------|
| Journal:                      | <i>BMJ Open</i>                                                                                                                                                                                                                                                                                                                                                                                                                                                                                                                                                                                                                                                                                                                                                                                                                                                                                                                                               |
| Manuscript ID                 | bmjopen-2021-052755                                                                                                                                                                                                                                                                                                                                                                                                                                                                                                                                                                                                                                                                                                                                                                                                                                                                                                                                           |
| Article Type:                 | Original research                                                                                                                                                                                                                                                                                                                                                                                                                                                                                                                                                                                                                                                                                                                                                                                                                                                                                                                                             |
| Date Submitted by the Author: | 25-Apr-2021                                                                                                                                                                                                                                                                                                                                                                                                                                                                                                                                                                                                                                                                                                                                                                                                                                                                                                                                                   |
| Complete List of Authors:     | Pereira, Filipa; University of Porto, Institute of Biomedical Sciences Abel Salazar; HES-SO University of Applied Sciences and Arts Western Switzerland, School of Health Sciences<br>Verloo, Henk; HES-SO University of Applied Sciences and Arts Western Switzerland, School of Health Sciences; Lausanne University Hospital, Service of Old Age Psychiatry<br>Zhivko, Taushanov; University of Geneva<br>Di Giovanni, Saviana; HES-SO University of Applied Sciences and Arts Western Switzerland, School of Health Sciences; Pharmacy Benu Tavil-Chatton<br>Meyer-Masseti, Carla; University of Bern, Institute for Primary Health Care<br>Von-Gunten, Armin; Lausanne University Hospital, Service of Old Age Psychiatry<br>Martins, Maria Manuela; Porto Higher School of Nursing; University of Porto, Institute of Biomedical Sciences Abel Salazar<br>Wernli, Boris; University of Lausanne, FORS, Swiss Centre of Expertise in the Social Sciences |
| Keywords:                     | Health informatics < BIOTECHNOLOGY & BIOINFORMATICS, GERIATRIC MEDICINE, CLINICAL PHARMACOLOGY, EPIDEMIOLOGY                                                                                                                                                                                                                                                                                                                                                                                                                                                                                                                                                                                                                                                                                                                                                                                                                                                  |
|                               |                                                                                                                                                                                                                                                                                                                                                                                                                                                                                                                                                                                                                                                                                                                                                                                                                                                                                                                                                               |

SCHOLARONE™  
Manuscripts

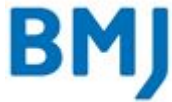

I, the Submitting Author has the right to grant and does grant on behalf of all authors of the Work (as defined in the below author licence), an exclusive licence and/or a non-exclusive licence for contributions from authors who are: i) UK Crown employees; ii) where BMJ has agreed a CC-BY licence shall apply, and/or iii) in accordance with the terms applicable for US Federal Government officers or employees acting as part of their official duties; on a worldwide, perpetual, irrevocable, royalty-free basis to BMJ Publishing Group Ltd ("BMJ") its licensees and where the relevant Journal is co-owned by BMJ to the co-owners of the Journal, to publish the Work in this journal and any other BMJ products and to exploit all rights, as set out in our [licence](#).

The Submitting Author accepts and understands that any supply made under these terms is made by BMJ to the Submitting Author unless you are acting as an employee on behalf of your employer or a postgraduate student of an affiliated institution which is paying any applicable article publishing charge ("APC") for Open Access articles. Where the Submitting Author wishes to make the Work available on an Open Access basis (and intends to pay the relevant APC), the terms of reuse of such Open Access shall be governed by a Creative Commons licence – details of these licences and which [Creative Commons](#) licence will apply to this Work are set out in our licence referred to above.

Other than as permitted in any relevant BMJ Author's Self Archiving Policies, I confirm this Work has not been accepted for publication elsewhere, is not being considered for publication elsewhere and does not duplicate material already published. I confirm all authors consent to publication of this Work and authorise the granting of this licence.

# A registry-based cohort study of disease- and drug-related 30-day hospital readmissions among polymedicated older inpatients

Pereira Filipa<sup>1</sup>, Verloo Henk<sup>2</sup>, Taushanov Zhivko<sup>3</sup>, Di Giovanni Saviana<sup>4</sup>, Meyer-Masseti Carla<sup>5</sup>, von Gunten Armin<sup>6</sup>, Martins Maria Manuela<sup>7</sup>, Wernli Boris<sup>8</sup>

<sup>1</sup> Institute of Biomedical Sciences Abel Salazar, University of Porto

Rua de Jorge Viterbo Ferreira, 228 4050-313 Porto, Portugal

School of Health Sciences, HES-SO University of Applied Sciences and Arts Western Switzerland

5, Chemin de l'Agasse, CH-1950 Sion, Switzerland

Email: [filipa.pereira@hevs.ch](mailto:filipa.pereira@hevs.ch); Phone: +41 78 666 17 00; Fax: +41 27 606 84 00

ORCID: <https://orcid.org/0000-0001-9207-4856>

<sup>2</sup> School of Health Sciences, HES-SO University of Applied Sciences and Arts Western Switzerland

5, Chemin de l'Agasse, CH-1950 Sion, Switzerland

Service of Old Age Psychiatry, Lausanne University Hospital

Email: [henk.verloo@hevs.ch](mailto:henk.verloo@hevs.ch); Phone: +41 27 606 84 34

ORCID: <http://orcid.org/0000-0002-5375-3255>

<sup>3</sup> University of Geneva

CH-1205 Geneva, Switzerland

Email: [zhivko.taushanov@unige.ch](mailto:zhivko.taushanov@unige.ch)

ORCID: <https://orcid.org/0000-0002-3798-757X>

<sup>4</sup> School of Health Sciences, HES-SO University of Applied Sciences and Arts Western Switzerland

5, Chemin de l'Agasse, CH-1950 Sion, Switzerland

Pharmacy Benu Tavail-Chatton

Grand rue 11, CH-1110 Morges, Switzerland

Email: [saviana.digiovanni@gmail.com](mailto:saviana.digiovanni@gmail.com)

<sup>5</sup> Institute for Primary Health Care, University of Bern

Mittelstrasse 43, CH-3012 Bern, Switzerland

Email: [carla.meyer-masseti@biham.unibe.ch](mailto:carla.meyer-masseti@biham.unibe.ch)

ORCID: <https://orcid.org/0000-0002-3523-5729>

<sup>6</sup> Service of Old Age Psychiatry,

Lausanne University Hospital

Route de Cery 60, 1008 Prilly, Switzerland

Email: [armin.von-gunten@chuv.ch](mailto:armin.von-gunten@chuv.ch); Phone: +41 21 314 52 67

1  
2  
3 ORCID: <https://orcid.org/0000-0001-7852-3803>  
4  
5

6 <sup>7</sup> Higher School of Nursing of Porto

7 Institute of Biomedical Sciences Abel Salazar, University of Porto

8 Rua Dr. António Bernardino de Almeida

9 4200-072 Porto, Portugal

10 Email: [mmartins@esenf.pt](mailto:mmartins@esenf.pt); Phone: +351 22 507 35 00

11 ORCID: <https://orcid.org/0000-0003-1527-9940>  
12  
13  
14  
15

16 <sup>8</sup> FORS, Swiss Centre of Expertise in the Social Sciences, University of Lausanne

17 Géopolis, CH-1015 Lausanne, Switzerland

18 Email: [boris.wernli@fors.unil.ch](mailto:boris.wernli@fors.unil.ch); Phone: +41 21 692 37 23

19 ORCID: <https://orcid.org/0000-0002-5567-1317>  
20  
21  
22

23 **Corresponding author:**

24 Pereira F

25 Institute of Biomedical Sciences Abel Salazar, University of Porto

26 Rua de Jorge Viterbo Ferreira, 228 4050-313 Porto, Portugal

27 School of Health Sciences, HES-SO University of Applied Sciences and Arts Western Switzerland

28 5, Chemin de l'Agasse, CH-1950 Sion, Switzerland

29 Email: [filipa.pereira@hevs.ch](mailto:filipa.pereira@hevs.ch); Phone: +41 78 666 17 00; Fax: +41 27 606 84 00

30 ORCID: <https://orcid.org/0000-0001-9207-4856>  
31  
32  
33  
34  
35  
36  
37  
38  
39  
40  
41  
42  
43  
44  
45  
46  
47  
48  
49  
50  
51  
52  
53  
54  
55  
56  
57  
58  
59  
60

## Abstract

**Objectives:** The present study analysed four years of a hospital register (2015–2018) to investigate associations between 30-day hospital readmission risk and the medical conditions and drug regimens of polymedicated, older inpatients discharged home.

**Design:** Population-based longitudinal study.

**Setting:** A public general hospital centre in the French-speaking part of Switzerland.

**Participants:** We explored the electronic records of 20,422 inpatient stays by polymedicated, home-dwelling older adults held in the hospital's patient register. We identified 13,802 separate patients over 64 years old.

**Outcome measures:** Sociodemographic characteristics, medical conditions, and drug regimen data associated with readmission within 30 days of discharge.

**Results:** The overall 30-day hospital readmission rate was 7.8%. Higher risks of hospital readmission were associated with longer hospital length of stay (OR = 1.014), impaired mobility (OR = 1.218), multimorbidity (OR = 1.419), tumoural disease (OR = 2.538), polypharmacy (OR = 1.043), and certain specific drugs, including antiemetics and antinauseants (OR = 3.216), antihypertensives (OR = 1.771), drugs for functional gastrointestinal disorders (OR = 1.424), systemic hormonal preparations (OR = 1.207), and vitamins (OR = 1.201), as well as the concurrent use of beta-blocking agents and proton pump inhibitors (OR = 1.367).

**Conclusions:** Thirty-day hospital readmission risks were associated with longer hospital length of stay, health disorders, polypharmacy and drug regimens. The drug regimen patterns increasing the risk of hospital readmission were very heterogeneous. Further research is needed to explore hospital readmissions caused solely by specific drugs and drug–drug interactions.

**Keywords:** polypharmacy; odds ratio; logistic regression; hospital register; ATC Classification System; adverse-drug events; hospital readmission.

### Strengths and limitations of this study:

- The records of 20,422 separate hospitalisations involving 13,802 polymedicated home-dwelling older patients were investigated for the prevalence of 30-day hospital readmission.
- The study includes four years' data from an exhaustive hospital register (2015–2018).
- A whole series of sociodemographic and clinical parameters, medical conditions and prescribed drugs were used to predict the probability of hospital readmission.
- Analyses were correlational and no causality could be demonstrated.
- Although the study considered statistical associations between drugs and rehospitalisations, it did not use clinically diagnosed drug–drug interactions.

## 39 Introduction

40 Longitudinal studies have demonstrated that approximately 20% of the home-dwelling older adults  
41 supported by home health-care services experienced hospital readmission within 30 days of their  
42 discharge (1-3). For many older adults, readmission to an acute hospital is associated with a functional  
43 decline that has not always recovered by the time they are discharged (4). However, the systematic review  
44 by Hansen *et al.* revealed wide-ranging estimates (5%–79%) of how many hospital readmissions were  
45 preventable (5). The period between hospital discharge and readmission has not always been clearly  
46 stated in the literature, ranging from 30 days to 3 years. However, 30 days is the most frequently used in  
47 public health policy when measuring health-care system performance (6-8).

48  
49 Numerous determinants have been identified and associated with hospital readmissions, e.g.  
50 sociodemographic and individual characteristics, multimorbidity and medical events (9, 10). A substantial  
51 risk of 30-day hospital readmission has been associated with older inpatients treated for different diseases  
52 and surgical interventions involving hip fracture, cancer, bypass, acute cardiovascular events or complex  
53 surgery (11). The reasons for hospital readmission after a surgical intervention are often not directly  
54 related to the surgery itself but rather to underlying chronic health conditions (12). Thus, chronic diseases  
55 may play an important role in readmission risk, independently of the reason for the initial hospitalisation  
56 (13, 14). Chronic diseases are not isolated health conditions among older inpatients: they can influence  
57 each other and treatment for one disease may adversely affect another (15). For all these reasons, patterns  
58 of 30-day hospital readmissions may be very complex (16).

59  
60 Multimorbidity, in the case of two or more diseases (17, 18), may require taking multiple medicines (19),  
61 known as polypharmacy (PP) when daily intake involves five or more drugs (20). Increasing incidences  
62 of multimorbidity with age, and consequently PP, add to the complexity of managing older inpatients’  
63 drug prescriptions, particularly at hospital discharge (21, 22). PP and inadequate drug management are  
64 significant risk factors for adverse drug events (ADEs)—the most common post-discharge  
65 complications—alongside hospital-acquired infections and procedural complications (23, 24). ADEs  
66 resulting from inappropriate drug prescribing, discrepancies between prescribed and current regimens,  
67 poor adherence and the inadequate surveillance of adverse effects frequently lead to hospital admissions,  
68 readmissions (8) and other undesirable consequences such as increased morbidity, decreased autonomy,  
69 institutionalisation and even early death (25, 26). A systematic review by Morabet *et al.* indicated ADE  
70 rates of 18%–38% after hospital discharge and 4.5%–24% hospital readmission rates due to those ADEs  
71 (27). Because older adults use more drugs, they are at a greater risk of drug-related readmission.  
72 Numerous studies have found that nearly 30% of older inpatients experienced ADEs within three weeks  
73 of hospital discharge, almost three-quarters of which could have been prevented or lessened (10, 28, 29).

74  
75 Despite the significant overall impact of ADEs on hospital readmission rates, little is known about  
76 hospital readmission risk’s associations with medical conditions and drug regimens (30, 31). Morabet *et al.*  
77 *al.* revealed the high prevalence of antibiotics, diuretics, vitamin K antagonists, opioids, antidiabetics,

1  
2  
3  
4 78 anti-cancer drugs, antihypertensives, digitalis glycosides, corticosteroids and psychotropic drugs in drug-  
5 79 related hospital readmissions (27). Samoy *et al.* reported that anticoagulants, hypoglycaemics, beta-  
6 80 blocking agents, antidepressants, calcium channel blockers and lenograstim were associated with high  
7 81 risks of hospital readmission (32). A retrospective patient record study by Teymoorian *et al.* reported that  
8 82 anticoagulants and antiplatelet agents, diuretics and antihypertensives, and opioids were associated with a  
9 83 high risk of persons aged 80 years old or more being readmitted to hospital within 30 days (33). Blanc *et*  
10 84 *al.* reported the readmission scores of different drugs in a large sample of 10,374 adult hospital  
11 85 admissions in general medicine. Taking beta-blocking agents, calcium channel blockers, diuretics,  
12 86 hypoglycaemic drugs or opioids was a significant risk for 30-day readmission (9).

13 87  
14 88 Besides higher risks of drug-related hospital readmission, some studies have also investigated  
15 89 associations between combining drugs—a common practice when treating complex diseases or co-  
16 90 existing medical conditions—and drug-related hospital readmissions. Although using multiple drugs may  
17 91 be good clinical practice and compliant with guidelines for treating certain diseases, one significant  
18 92 consequence of combining drugs is that patients face much higher risks of ADEs, which can be caused by  
19 93 drug–drug interactions (34-36). ADEs can emerge because a drug’s pharmacokinetics and  
20 94 pharmacodynamics change if taken with another drug (36). Moura *et al.* found that participants with  
21 95 potential drug–drug interactions on their prescription list had a 2.4 times higher adjusted odds ratio (OR)  
22 96 of being readmitted (37).

23 97  
24 98 Even though some studies have reported high numbers of readmissions among home-dwelling older  
25 99 patients for a variety of drugs (38), this health issue was mostly investigated using prospective or cross-  
26 100 sectional studies with small samples. More insight is needed into patterns of drug-related hospital  
27 101 readmissions and risk factors in order to design better interventions for addressing ADEs (39, 40). As part  
28 102 of a broader project (41), the present study’s goal was to use hospital register data to prioritise risk factors  
29 103 for hospital readmission. We hypothesised that sociodemographic characteristics, medical conditions  
30 104 (defined using the WHO’s International Classification of Diseases, tenth revision: ICD-10, and the Swiss  
31 105 Classification of Surgical Interventions: CHOP), and drug prescriptions (based on the WHO’s Anatomical  
32 106 Therapeutic Chemical (ATC) Classification System) were significant risk factors for 30-day hospital  
33 107 readmission for discharged older adults.

## 34 108 35 109 **Material and Methods**

### 36 110 **Study Design**

37 111 This population-based longitudinal study investigated the associations between the risks of discharged,  
38 112 polymedicated, home-dwelling older patients being readmitted to hospital within 30 days and their drug  
39 113 prescriptions and medical conditions. The study was performed with close regard to the REporting of  
40 114 studies Conducted using Observational Routinely collected health Data (RECORD) statement (42).

41 115  
42 116



## 117 **Population and Data Collection**

118 Our custom, four-year, population-based dataset was composed of polymedicated (five or more drugs  
119 prescribed at hospital discharge), multimorbid (two or more ICD-10 diagnoses), home-dwelling older  
120 adult participants (65 years old and above) admitted and readmitted to a public general hospital in the  
121 French-speaking part of Switzerland. This specific population was selected because of its increased risk  
122 of hospital readmission (10, 28, 29). The hospital register contains a comprehensive and exhaustive  
123 electronic health record (43). However, no electronic patient records were available for adult psychiatry  
124 for 2015–2018. The extracted patient data contained sociodemographic characteristics, medical and  
125 surgical diagnoses, routinely assessed clinical data (such as gait, falls risk or hearing) from hospitalised  
126 patients with at least five prescribed drugs and their prescribed drugs at discharge. Medical and surgical  
127 diagnoses were coded based on the ICD-10 and CHOP (44). Drug classification was based on the WHO's  
128 ATC Classification System (45).

129 The strategy for transforming and synthesising the data extracted from the register's multiple dataset  
130 sources was based on Olsen's register-based methodological considerations (46) and has been  
131 documented elsewhere (47). Our dataset was composed of 20,422 hospital admission records running  
132 from January 2015 to December 2018, with similar numbers of annual hospital admissions: 5134, 5095,  
133 5125, and 5068, respectively.

## 135 **Patient and Public Involvement**

136 Neither patients nor public were directly involved in the development of the research questions, study  
137 design, outcome measures, recruitment and conduct of the study.

## 139 **Dataset Customisation for Predictive Analysis**

140 The dataset was recoded and customised to identify the frequency of older patients' hospital admissions.  
141 Each subject's unique identifier was used to distinguish their different hospital stays from 2015–2018.  
142 The dataset included 13,802 hospital stays involving older inpatients discharged home and whose data  
143 were complete (no missing values). These complete datasets related to 8,878 different individuals, with an  
144 average of 1.55 inpatient hospital stays. Sociodemographic and clinical data were considered independent  
145 variables and used to compute the predictive models. Readmission following discharge home was defined  
146 as the dependent variable of interest and was dichotomised (0 = no, 1 = yes) based on 30-day readmission  
147 between 2015 and 2018. Furthermore, the custom dataset was composed of six clinical clusters based on  
148 agglomerative hierarchical clustering methods for identifying clinically relevant characteristics and  
149 representing older inpatients' health status. Medical status and drugs data were recoded and copied to an  
150 exploitable population database (47).

## 152 **Sociodemographic Variables and Length of Stay**

153 Sex and age were included in the analysis as sociodemographic control variables. The total sample's  
154 mean age was 77.77 years old (SD = 7.48), and 57% were women. Age was considered a continuous

1  
2  
3  
4 155 variable as its progressive impact has been proven in preliminary investigations and previous studies (48).  
5 156 The average hospital length of stay (LOS) was 8.44 days (SD = 7.58).  
6  
7 157  
8  
9 158  
10 159

### 11 160 **Health Variables**

12  
13 161 Numerous variables were used to describe older patients' health status during each hospital stay. Three of  
14 162 six preliminarily computed hierarchical clusters (47) were included in the modeling analysis as  
15 163 confounding variables: the mobility cluster, the dependency in the activities of daily living cluster and the  
16 164 mental state cluster (47). Twenty-five per cent of the sample had impaired mobility, 4% were impaired in  
17 165 their activities of daily living and 4% showed mental impairment at discharge. Our sample population  
18 166 averaged 4.58 (SD = 0.92) ICD-10 diagnoses, with their individual numbers used to model  
19 167 multimorbidity, and 1.80 (SD = 1.76) surgical interventions (CHOP) performed during the  
20 168 hospitalisation. The selected medical diagnoses distinguished patients affected by circulatory (24%),  
21 169 infectious (3%), and respiratory diseases (11%), as well as trauma (8%) and tumours (11%). Finally, the  
22 170 year of hospitalisation was introduced as a control variable, based on the fact that earlier admission to  
23 171 hospital during this period led to a higher probability of unplanned readmissions during the entire period  
24 172 covered.  
25  
26 173

### 27 174 **Included Drugs**

28 175 Drugs were classified according to the WHO's ATC Classification System (49) and then included in the  
29 176 predictive model as independent variables. To ensure robust statistical results, the model only included  
30 177 drug categories prescribed to at least 30 participants (n = 13,802). Drug prescription was considered  
31 178 continuous, with an average of 8.95 (SD = 3.24) drugs per patient prescribed at hospital discharge. Table  
32 179 1 presents the prescribed ATC classified drugs included in the predictive model as independent variables.

33 180 **[Insert Table 1]**  
34  
35 181

### 36 182 **Data analysis strategy**

37 183 Data were extracted into a Microsoft Excel spreadsheet (Microsoft, Redmond, Washington, United  
38 184 States) and then imported into SPSS software, version 26.0 (IBM Corp, Armonk, New York, United  
39 185 States). We examined statistical associations between hospital readmissions and patient age and sex,  
40 186 LOS, principal and related ICD-10 diagnoses, CHOP interventions and drug prescriptions during  
41 187 hospitalisations. A causality analysis between those variables was impossible given our retrospective data  
42 188 collection method, our inability to calculate the time between drug intake and readmission, and the  
43 189 potential drug changes between hospitalisation sequences. We conducted a bivariate analysis relating the  
44 190 independent variables to 30-day readmission after discharge home from 2015–2018. In a second stage, a  
45 191 series of multilevel binary logistic regression models were computed to estimate how sets of predictors  
46 192 influenced the probability of 30-day hospital readmission. The first level concerned hospital LOS, and the  
47 193 second level included individuals' characteristics and health conditions. The model projected each  
48  
49  
50  
51  
52  
53  
54  
55  
56  
57  
58  
59  
60

1  
2  
3  
4 194 predictor's impact, other things being equal, by estimating its net impact, controlling for other factors  
5 195 (adjusted ORs). The model also considered correlations between each subject's different variables, which  
6 196 were generally not independent (50). The model's random intercept design allowed each individual's  
7 197 intercept to vary, assuming that some unmeasured traits remained stable over time and allowing a better  
8 198 estimation of the model's parameters. The other estimated parameters, on the other hand, had the same  
9 199 effect on every subject. This regression analysis dichotomised the probabilities of future readmissions  
10 200 within 30 days (0 = no, 1 = yes) of discharge home. Since the data were based on a whole population, not  
11 201 a sample, the ORs' confidence intervals and statistical tests were used to indicate the robustness of  
12 202 relationships (they usually only make sense for statistical inference).  
13  
14  
15  
16  
17  
18

### 19 204 **Patients and public involvement**

20 205 Patients were not involved in the development of the research questions, study design, outcome measures  
21 206 and conduct of the study.  
22  
23

## 24 208 **Results**

### 26 209 **Associations between Thirty-day Hospital Readmission and Sociodemographic Characteristics and** 27 210 **Medical Conditions**

28  
29 211 The prevalence of 30-day hospital readmission for older patients discharged home was 7.8%. Bivariate  
30 212 associations showed significant differences between participants' sociodemographic characteristics and  
31 213 medical conditions (Table 2). Men showed a slightly higher proportion of 30-day hospital readmissions  
32 214 than women (8.2% vs 7.3%). However, age did not significantly affect the probability of 30-day  
33 215 readmission. More readmissions were also seen among older patients with a circulatory disease (8.2% vs  
34 216 6.5%), those not affected by trauma (8.0% vs 5.8%), and especially those with a tumour (15.1% vs 6.9%).  
35 217 Multimorbidity also increased the prevalence of 30-day hospital readmissions—from 1.5% for older  
36 218 patients with a single ICD-10 condition to 8.8% for those with five.

37 219 **[Insert Table 2]**  
38  
39  
40  
41  
42

### 43 221 **Associations between Thirty-day Hospital Readmission and Drugs**

44 222 On average, older patients readmitted within 30 days had more prescribed drugs than those who were not  
45 223 readmitted (9.95 drugs vs 8.87). We found a linear relationship between the 30-day readmission rate and  
46 224 the average number of prescribed drugs ( $p > 0.001$ ), which supported the absence of a cut-off point in this  
47 225 relationship (Figure 1).

48 226 **[Insert Figure 1]**  
49  
50  
51  
52

53 228 Among the most robust statistical associations with 30-day hospital readmissions involved the classes of  
54 229 drugs including antineoplastics and immunomodulators (12.6% vs 7.6% for those not treated with them)  
55 230 and taking antiemetics and antinauseants (27.7% vs 7.7%). There was also a high prevalence of 30-day  
56 231 hospital readmission among participants taking drugs for functional gastrointestinal disorders (13.4% vs  
57 232 7.4%) and antihypertensives (14.1% vs 7.7%) (Table 3).  
58  
59  
60

1  
2  
3  
4 233 [Insert Table 3]  
5  
6 234

7 235 **Baseline Multivariate Model**

8 236 A baseline, multivariate logistic regression model including older patients' sociodemographic and clinical  
9 237 variables, but not their prescribed drugs at discharge, was computed to predict 30-day hospital  
10 238 readmission after discharge home (Table 4). Neither sex nor age had a significant impact. On the  
11 239 contrary, LOS had a significant impact (OR = 1.014 for each additional day; 95% CI: 1.006–1.021), as  
12 240 did mobility (OR = 1.218 for older patients with an impaired mobility status; 95% CI: 1.039–1.427).  
13 241 Dependence in the activities of daily living and mental health status showed no influence. Concerning  
14 242 diagnoses measured in the ICD-10, we found that older patients with a tumoural disease (OR = 2.538;  
15 243 95% CI: 2.089–3.082) were much more susceptible to 30-day hospital readmission. Patients with  
16 244 circulatory pathologies showed no difference from the reference category (OR = 0.938; 95% CI: 0.783–  
17 245 1.124), and nor did those with respiratory problems (OR = 1.100; 95% CI: 0.875–1.382), trauma  
18 246 (OR = 0.847; 95% CI: 0.633–1.134) or infection-related problems (OR = 1.381; 95% CI: 0.964–1.977;  
19 247  $p = 0.078$ ). Having several pathologies predicted a higher probability of readmission (OR = 1.419 per  
20 248 additional ICD-10 condition; 95% CI: 1.282–1.572), whereas the number of surgical procedures had no  
21 249 noticeable impact (OR = 0.978; 95% CI: 0.938–1.020). The year of hospital stay did have an impact,  
22 250 however, as the earlier the hospitalisation during the four years under review, the higher the probability of  
23 251 readmission (OR = 0.933 per additional year; 95% CI: 0.880–0.990).

24 252 [Insert Table 4]  
25 253

26 254 **Prediction of 30-day Hospital Readmission and Drug Prescriptions**

27 255 Table 5 presents the baseline logistic regression model completed with the drugs prescribed to older  
28 256 patients at discharge home that were significantly associated ( $p = < 0.05$ ) with 30-day hospital  
29 257 readmission. It was impossible to introduce the total number of drugs prescribed jointly in this model  
30 258 because of their collinearity with other drug variables. Non-significant drugs and other variables have  
31 259 been omitted from Table 3 in order to simplify the presentation. The probabilities of 30-day hospital  
32 260 readmission are presented in descending order of discharged older patients' ORs for each additional unit  
33 261 of the drugs in question. Intake of antiemetics and antinauseants was very strongly linked to 30-day  
34 262 readmission (OR = 3.216 for each additional drug unit taken; 95% CI: 1.842–5.617), as were those of  
35 263 antihypertensives (OR = 1.771; 95% CI: 1.287–2.438), gastrointestinal drugs (OR = 1.424; 95% CI:  
36 264 1.166–1.739), systemic hormonal preparations (OR = 1.207; 95% CI: 1.052–1.385) and vitamins  
37 265 (OR = 1.201; 95% CI: 1.049–1.374). On the contrary, the intake of lipid-modifying agents was associated  
38 266 with a decrease in 30-day hospital readmissions (OR = 0.841 for each drug from this class prescribed;  
39 267 95% CI: 0.732–0.967).

40 268 [Insert Table 5]  
41 269

42 270 **Drug Interactions and 30-day Hospital Readmissions**

1  
2  
3  
4 271 For statistical purposes, drug–drug interactions between different ATC drug classes (49) were  
5 272 operationalised as dichotomised variables (0 = no simultaneous use of drugs from both classes,  
6 273 1 = simultaneous use of drugs from both classes) and added to the previous model. Drug class interactions  
7 274 were selected based on a literature review, significant ORs, and expert opinions (51). The model  
8 275 considered drug class interactions for the: 1) cardiovascular system \* central nervous system,  
9 276 gastrointestinal system, and metabolism \* cardiovascular system; 2) gastrointestinal system and  
10 277 metabolism \* central nervous system; 3) cardiovascular system \* anti-infectives; and 4) central nervous  
11 278 system \* anti-infectives. The analysis was carried out controlling for the basic model’s variables (Table  
12 279 4), and the table reports the ORs for each additional unit of the statistically significant drugs in question,  
13 280 as well as for significant drug interactions. Antiemetics and antinauseants were very strongly associated  
14 281 with 30-day readmission (OR = 3.222; 95% CI: 1.844–5.630), as were drugs regulating the  
15 282 gastrointestinal tract (OR = 1.428; 95% CI: 1.169–1.744) and systemic hormones (OR = 1.210; 95% CI:  
16 283 1.054–1.390). The joint intake of beta-blocking agents and drugs for acid-related disorders was  
17 284 significantly associated with 30-day hospital readmission (OR = 1.367; 95% CI: 1.046–1.788); this is the  
18 285 only significant drug interaction in Table 4. On the contrary, lipid-modifying agents were associated with  
19 286 lower 30-day hospital readmission (OR = 0.838), as were substances acting on the renin–angiotensin  
20 287 system (OR = 0.892; 95% CI: 0.796–0.999) (Table 6).

21 288 [Insert Table 6]

## 22 289

### 23 290 Discussion

24 291 The present study examined the records of 20,422 separate hospitalisations involving polymedicated  
25 292 home-dwelling older patients, eventually discharged home, for the prevalence of 30-day hospital  
26 293 readmission. These records were held in four years of an exhaustive hospital register. The 13,802  
27 294 individual older patients identified showed a 30-day hospital readmission rate of almost 8%,  
28 295 corroborating previously published all-cause hospital readmission rates among home-dwelling older  
29 296 patients (9, 27). However, Jencks *et al.* (2009) found a much higher 30-day readmission prevalence,  
30 297 reaching almost 20% among discharged older patients who had been hospitalised in acute medicine and  
31 298 surgery wards (3). As a bivariate association, multimorbid men were at a significantly higher risk of  
32 299 readmission than multimorbid women; however, in the adjusted multivariate analysis that significance  
33 300 disappeared. Medical conditions, PP and multiple classes of prescribed drugs were all associated with  
34 301 higher 30-day readmission rates, in line with previous studies (27, 52–54).

35 302 Our study found no significant differences in the risks of 30-day hospital readmission for men and  
36 303 women. However, some previous research found that men were more likely to forget to take their drugs  
37 304 or to not apply the changed drug dosages prescribed by their family physician, consequently increasing  
38 305 their risk of hospital readmission for drug-related problems (55). Opposite results were found in a  
39 306 population-based study by Manteufel *et al.* (56), with women being less likely than men to properly  
40 307 adhere to their drug prescriptions. These differences may indicate a need for more personalised drug  
41 308 prescription and drug management to improve clinical outcomes. Further research should explore  
42 309 associations between different types of drugs and sex (56, 57), but this topic was beyond the present  
43 60



1  
2  
3  
4 310 study's scope. Another interesting issue regarding sex differences in hospital readmission rates is the  
5 311 study window. Some studies found higher rates among men than among women below three-month  
6 312 readmissions. More extended time windows (e.g. one year) revealed no significant sex differences (52,  
7 313 58). An analysis of our dataset using a more extended readmission window might clarify this point and  
8 314 provide complementary knowledge about sex-associated hospital readmissions.  
9 315 Our results indicated that ageing was not a risk factor for increased 30-day hospital readmission, in line  
10 316 with some previous publications (53, 59). However, other research findings demonstrated that age was  
11 317 only positively associated with the likelihood of readmission up to 74 years old; above that, there no  
12 318 longer appeared to be any significant relationship between age and readmission (60, 61). These  
13 319 contrasting results may be explained by the studies' designs, country settings, the ages of their research  
14 320 populations or the medical conditions included (53, 60, 62).  
15 321 Longer hospital stays were also associated with a higher risk of hospital readmission, in line with a cohort  
16 322 study by Sud *et al.* concluding that an extended hospital LOS was associated with increased rates of all  
17 323 types of readmission, except for hospitalisation after heart failure, where a short LOS was associated with  
18 324 increased rates of readmission for cardiovascular disease and heart failure (63).  
19 325 Our results indicated a significant positive association between the number of a patient's medical  
20 326 conditions and the 30-day hospital readmission rate, confirming other recent retrospective hospital  
21 327 register studies (64, 65). More specifically, older patients with impaired mobility showed an increased  
22 328 risk of hospital readmission. This result was not surprising, bearing in mind that although these older  
23 329 patients were discharged home—and not to a nursing home—after their hospital stay, their health status  
24 330 might nevertheless require future readmission. Indeed, this corroborated publications about older patients  
25 331 discharged after orthopaedic treatment or who had been initially admitted for heart failure, myocardial  
26 332 infarction or pneumonia, but also presented with impaired mobility (66, 67).  
27 333 Cognitive impairment was not associated with increased 30-day hospital readmission rates, in line with  
28 334 findings from the systematic review by Pickens *et al.*, which pointed out that dementia had a modest  
29 335 impact on readmission rates (68). It was no surprise that inpatients hospitalised for cancer faced a high  
30 336 risk of readmission, corroborating prior studies by Buhenn *et al.*, Chang *et al.* and Butcher (69-71).  
31 337 PP significantly increased the 30-day hospital readmission rate, but this result was based on the average  
32 338 number of drugs prescribed to the sample of readmitted patients versus those not readmitted. Although PP  
33 339 was confirmed as a strong determinant of 30-day hospital readmission in publications by Leendertse *et al.*  
34 340 (72, 73), our results showed a progressive linear relationship between PP and readmission rate, and this  
35 341 should be interpreted with caution. Despite our results and other publications and research underlining the  
36 342 challenge of PP among multimorbid older patients, there is no overall consensus about the best way to  
37 343 deal with the broad general relationship between PP and hospital readmission (74).  
38 344 Our advanced statistical analysis demonstrated that some specific drugs and the concomitant use of  
39 345 specific drug combinations were significantly associated with 30-day readmission risk, although this was  
40 346 not unexpected and has been confirmed in previous publications (37, 75). Mostly in line with the research  
41 347 findings of Zhang *et al.*, drugs including hormones, antineoplastics, immunosuppressors, neoplastic  
42 348 antibiotics and bacterial vaccines were substantial risk factors for hospital readmission (7).

1  
2  
3  
4 349 In summary, extended hospital LOS, functional impairments, medical conditions and drugs have been  
5 350 demonstrated to be determinants of 30-day hospital readmission, although not all of them have clinically  
6 351 or pharmacologically relevant interpretations or explanations. Further research involving large samples is  
7 352 needed, notably to explore the drug–drug interactions with the highest risk of hospital readmissions.  
8 353 Statistical predictions of potential drug–drug interactions provide important information for modeling  
9 354 drug combinations and identifying pairs of drugs whose combination creates an exaggerated response (9).  
10 355 As the association between the number of drugs and the prevalence of hospital readmission was linear,  
11 356 more advanced inferential statistics would be needed to clarify a cut-off point for the mean number of  
12 357 drugs that would significantly increase the readmission rate. In addition, problems involving adherence to  
13 358 prescriptions, social support networks, and stronger or weaker primary health-care structures can all  
14 359 influence hospital readmission rates (39). According to some publications, nearly 70% of people aged  
15 360 over 65 make mistakes with their drugs (76, 77). Information about drug adherence, drug underuse and  
16 361 overuse, drug changes and deprescription by family physicians, as well as medication management at  
17 362 home would contribute to a more comprehensive understanding of disease- and drug-related 30-day  
18 363 hospital readmissions.  
19 364

### 27 365 **Strengths and Limitations**

28 366 This study's main strength was its use of comprehensive and recorded data from an exhaustive register.  
29 367 We consider this retrospective study useful for clinical practice and future research because a whole series  
30 368 of sociodemographic and clinical parameters, medical conditions and prescribed drugs were used to  
31 369 predict the probability of hospital readmission. Using both bivariate and multivariate analyses enabled an  
32 370 evaluation of the data's longitudinal nature.  
33 371 Our study had several limitations, nevertheless. The design did not allow us to identify hospitalisations  
34 372 and readmissions lost-to-follow-up and to adjust our data for death. We were also unable to identify  
35 373 unnecessary hospitalisations or any bias towards hospitalisation rather than another health-care solution  
36 374 among participants. Our dataset could not inform us about whether older inpatients had been first  
37 375 admitted to another hospital or were subsequently readmitted elsewhere during the study period. Another  
38 376 limitation was the study's lack of formal screening methods to explain ADEs in detail, and it was  
39 377 impossible to distinguish between elective and urgent hospitalisations. Although the study considered  
40 378 statistical associations between drugs and rehospitalisations, it did not use clinically diagnosed drug–drug  
41 379 interactions. Finally, we were unable to consider any potential causality between PP and hospital  
42 380 readmission.  
43 381

### 51 382 **Conclusions**

52 383 Hospital length of stay, medical conditions, functional impairments and prescribed drugs were all critical  
53 384 factors in predicting hospital readmissions, thus affirming our hypotheses. Readmission patterns are  
54 385 complex and poorly understood because older patients often present with multiple chronic conditions,  
55 386 functional impairments and complex drug prescriptions. Hospital readmission is an under-investigated  
56  
57  
58  
59  
60

387 topic deserving of additional, well-conducted, predictive research exploiting accurate longitudinal data  
388 from large samples.

389

### 390 **Acknowledgments**

391 The authors thank the partner hospital, including the hospital's data warehouse, for its valuable  
392 contributions. This research was developed, in part, using grants from the Swiss National Science  
393 Foundation and the School of Health Sciences of the University of Applied Sciences and Arts Western  
394 Switzerland (HES-SO) Valais/Wallis. The funders had no role in the design and conduct of the study, the  
395 collection, management, analysis and interpretation of the data, the preparation, review or approval of the  
396 manuscript, or the decision to submit the manuscript for publication.

### 397 **Authors Contributions**

398 All the authors contributed to data analysis or interpretation, to drafting or revising the article, gave final  
399 approval to the version to be published and agree to be accountable for all aspects of the work.

### 400 **Funding**

401 This study was supported by the Swiss National Science Foundation via grant number 407440\_183434/1.

### 402 **Competing interest**

403 The authors report no conflicts of interest surrounding this work.

### 404 **Ethics approval and patient consent**

405 Ethical approval was obtained from the Human Research Ethics Committee of the Canton of Vaud (CER-  
406 VD, 2018-02196), thus permitting our partner hospital's data warehouse to provide the appropriate  
407 dataset. Given the retrospective data source, obtaining consent from the patients concerned was  
408 impossible or posed disproportionate difficulties. The present study respects the legal requirements for  
409 research projects involving data re-use without consent, as set out in Art. 34 from the Swiss Human  
410 Research Act (HTA).

### 411 **Data sharing statement**

412 As part of the Data Use Agreement, authors are not allowed to provide raw data. Upon a reasonable  
413 request, the corresponding author will provide statistical programming code used to generate results.

414 **Word Count:** 4,158

415

### 416 **References**

- 417 1. Rayan-Gharra N, Rn ES, Tadmor B, Flaks-Manov N, Balicer RD. Patients' ratings of the in-  
418 hospital discharge briefing and post-discharge primary care follow-up: the association with 30-day  
419 readmissions. *Patient Education and Counseling*. 2019.
- 420 2. Kabue S, Greene J, Kipnis P, Lawson B, Rinetti-Vargas G, Liu V, et al. The Impact of  
421 Pharmacy-specific Predictors on the Performance of 30-Day Readmission Risk Prediction Models. *Med*  
422 *Care*. 2019;57(4):295-9.
- 423 3. Jencks SF, Williams MV, Coleman EA. Rehospitalizations among Patients in the Medicare Fee-  
424 for-Service Program. *New England Journal of Medicine*. 2009;360(14):1418-28.



1  
2  
3  
4  
5  
6  
7  
8  
9  
10  
11  
12  
13  
14  
15  
16  
17  
18  
19  
20  
21  
22  
23  
24  
25  
26  
27  
28  
29  
30  
31  
32  
33  
34  
35  
36  
37  
38  
39  
40  
41  
42  
43  
44  
45  
46  
47  
48  
49  
50  
51  
52  
53  
54  
55  
56  
57  
58  
59  
60

- 425 4. Covinsky KE, Palmer RM, Fortinsky RH, Counsell SR, Stewart AL, Kresevic DM. Loss of  
426 independence in activities of daily living in older adults hospitalised with medical illness: increased  
427 vulnerability with age. *JAGS*. 2003;51.
- 428 5. Hansen LO, Young RS, Hinami K, Leung A, Williams MV. Interventions to reduce 30-day  
429 rehospitalization: a systematic review. *Ann Intern Med*. 2011;155(8):520-8.
- 430 6. Davies EC, Green CF, Mottram DR, Rowe PH, Pirmohamed M. Emergency re-admissions to  
431 hospital due to adverse drug reactions within 1 year of the index admission. *British Journal of Clinical  
432 Pharmacology*. 2010;70(5):749-55.
- 433 7. Zhang M, Holman CDAJ, Price SD, Sanfilippo FM, Preen DB, Bulsara MK. Comorbidity and  
434 repeat admission to hospital for adverse drug reactions in older adults: retrospective cohort study. *BMJ*.  
435 2009;338:a2752.
- 436 8. Bonnet-Zamponi D, d'Arailh L, Konrat C, Delpierre S, Lieberherr D, Lemaire A, et al. Drug-  
437 Related Readmissions to Medical Units of Older Adults Discharged from Acute Geriatric Units: Results  
438 of the Optimization of Medication in AGED Multicenter Randomized Controlled Trial. *Journal of the  
439 American Geriatrics Society*. 2013;61(1):113-21.
- 440 9. Blanc A-L, Fumeaux T, Stirnemann J, Dupuis Lozeron E, Ourhamoune A, Desmeules J, et al.  
441 Development of a predictive score for potentially avoidable hospital readmissions for general internal  
442 medicine patients. *PLOS ONE*. 2019;14(7):e0219348.
- 443 10. Stevenson JM, Davies JG, Martin F, Ali K, Rajkumar C, Schiff R. Is medication related harm as  
444 a cause of readmission associated with the indicators of frailty? *Age and Ageing*. 2018;47:ii19.
- 445 11. Brunner-La Rocca H-P, Peden CJ, Soong J, Holman PA, Bogdanovskaya M, Barclay L. Reasons  
446 for readmission after hospital discharge in patients with chronic diseases—Information from an  
447 international dataset. *PloS one*. 2020;15(6):e0233457.
- 448 12. Dharmarajan K, Hsieh AF, Lin Z, Bueno H, Ross JS, Horwitz LI, et al. Hospital readmission  
449 performance and patterns of readmission: retrospective cohort study of Medicare admissions. *Bmj*.  
450 2013;347.
- 451 13. Arora S, Patel P, Lahewala S, Patel N, Patel NJ, Thakore K, et al. Etiologies, trends, and  
452 predictors of 30-day readmission in patients with heart failure. *The American journal of cardiology*.  
453 2017;119(5):760-9.
- 454 14. Shams I, Ajourlou S, Yang K. A predictive analytics approach to reducing 30-day avoidable  
455 readmissions among patients with heart failure, acute myocardial infarction, pneumonia, or COPD.  
456 *Health care management science*. 2015;18(1):19-34.
- 457 15. Krumholz HM, Wang K, Lin Z, Dharmarajan K, Horwitz LI, Ross JS, et al. Hospital-  
458 readmission risk—isolating hospital effects from patient effects. *New England Journal of Medicine*.  
459 2017;377(11):1055-64.
- 460 16. Gruneir A, Fung K, Fischer HD, Bronskill SE, Panjwani D, Bell CM, et al. Care setting and 30-  
461 day hospital readmissions among older adults: a population-based cohort study. *CMAJ*.  
462 2018;190(38):E1124-E33.
- 463 17. Marengoni A, Angleman S, Melis R, Mangialasche F, Karp A, Garmen A, et al. Aging with  
464 multimorbidity: A systematic review of the literature. *Ageing Research Reviews*. 2011;10:430-9.
- 465 18. Valderas JM, Starfield B, Sibbald B, Salisbury C, Rloand M. Defining comorbidity: implications  
466 for understanding health and health services. *Annals Of Family Medicine*. 2009;7:357-63.
- 467 19. Maher RL, Hanlon J, Hajjar ER. Clinical consequences of polypharmacy in elderly. *Expert  
468 Opinion on Drug Safety*. 2014;13:57-65.
- 469 20. Masnoon N, Shakib S, Kalisch-Ellett L, Caughey GE. What is polypharmacy? A systematic  
470 review of definitions. *BMC Geriatrics*. 2017;17:1-10.
- 471 21. Wastesson JW, Morin L, Tan ECK, Johnell K. An update on the clinical consequences of  
472 polypharmacy in older adults: a narrative review. *Expert Opin Drug Saf*. 2018;17(12):1185-96.
- 473 22. Rieckert A, Trampisch US, Klaaßen-Mielke R, Drewelow E, Esmail A, Johansson T, et al.  
474 Polypharmacy in older patients with chronic diseases: a cross-sectional analysis of factors associated with  
475 excessive polypharmacy. *BMC Family Practice*. 2018;19(1):113.
- 476 23. Magill SS, Edwards JR, Bamberg W, Beldavs ZG, Dumyati G, Kainer MA, et al. Multistate  
477 point-prevalence survey of health care-associated infections. *N Engl J Med*. 2014;370(13):1198-208.
- 478 24. Coleman EA, Smith JD, Raha D, Min SJ. Posthospital medication discrepancies: prevalence and  
479 contributing factors. *Arch Intern Med*. 2005;165(16):1842-7.
- 480 25. Ferreri SP, Hughes TD, Snyder ME. Medication Therapy Management: Current Challenges.  
481 *Integr Pharm Res Pract*. 2020;9:71-81.

- 1  
2  
3  
4 482 26. Roux P, Verloo H, Santiago-Delefosse M, Pereira F. The spatial dimensions of medication  
5 483 management by home-dwelling older adults after hospital discharge. *Health & Place*. 2019;60:102230.  
6 484 27. El Morabet N, Uitvlugt EB, van den Bemt BJB, van den Bemt P, Janssen MJA, Karapinar-Çarkit  
7 485 F. Prevalence and Preventability of Drug-Related Hospital Readmissions: A Systematic Review. *J Am*  
8 486 *Geriatr Soc*. 2018;66(3):602-8.  
9 487 28. Forster AJ, Murff HJ, Peterson JF, Gandhi TK, Bates DW. The incidence and severity of adverse  
10 488 events affecting patients after discharge from the hospital. *Ann Intern Med*. 2003;138(3):161-7.  
11 489 29. Yeo I, Cheung JW, Feldman DN, Amin N, Chae J, Wong SC, et al. Assessment of Hospital  
12 490 Readmission Rates, Risk Factors, and Causes After Cardiac Arrest: Analysis of the US Nationwide  
13 491 Readmissions Database. *JAMA Network Open*. 2019;2(9):e1912208-e.  
14 492 30. Hauviller L, Eyvrard F, Garnault V, Rousseau V, Molinier L, Montastruc JL, et al. Hospital re-  
15 493 admission associated with adverse drug reactions in patients over the age of 65 years. *European Journal of*  
16 494 *Clinical Pharmacology*. 2016;72(5):631-9.  
17 495 31. Davies EC, Green CF, Mottram DR, Rowe PH, M P. Emergency re-admissions to hospital due to  
18 496 adverse drug reactions within 1 year of the index admission. *Br J Clin Pharmacol*. 2010;70:749-55.  
19 497 32. Samoy LJ, Zed PJ, Wilbur K, Balen RM, Abu-Laban RB, Roberts M. Drug-related  
20 498 hospitalizations in a tertiary care internal medicine service of a Canadian hospital: a prospective study.  
21 499 *Pharmacotherapy*. 2006;26(11):1578-86.  
22 500 33. Teymoorian SS, Dutcher D, Woods M. ASSOCIATION BETWEEN POSTDISCHARGE  
23 501 ADVERSE DRUG REACTIONS AND 30-DAY HOSPITAL READMISSION IN PATIENTS AGED 80  
24 502 AND OLDER. *Journal of the American Geriatrics Society*. 2011;59(5):948-9.  
25 503 34. WHO. ADHERENCE TO LONG-TERM THERAPIES: Evidence for action. Geneva: World  
26 504 Health Organisation; 2003.  
27 505 35. Brahma DK, Wahlang JB, Marak MD, Ch Sangma M. Adverse drug reactions in the elderly. *J*  
28 506 *Pharmacol Pharmacother*. 2013;4(2):91-4.  
29 507 36. Davies EA, O'Mahony MS. Adverse drug reactions in special populations - the elderly. *Br J Clin*  
30 508 *Pharmacol*. 2015;80(4):796-807.  
31 509 37. Moura CS, Tavares LS, Acurcio Fde A. [Hospital readmissions related to drug interactions: a  
32 510 retrospective study in a hospital setting]. *Rev Saude Publica*. 2012;46(6):1082-9.  
33 511 38. Spinks JM, Kalisch Ellett LM, Spurling G, Theodoros T, Williamson D, Wheeler AJ. Adaptation  
34 512 of potentially preventable medication-related hospitalisation indicators for indigenous populations in  
35 513 Australia using a modified Delphi technique. *BMJ Open*. 2019;9(11):e031369.  
36 514 39. Rosen OZ, Fridman R, Rosen BT, Shane R, Pevnick JM. Medication adherence as a predictor of  
37 515 30-day hospital readmissions. *Patient Prefer Adherence*. 2017;11:801-10.  
38 516 40. Pellegrin KL, Lee E, Uyeno R, Ayson C, Goo R. Potentially preventable medication-related  
39 517 hospitalizations: A clinical pharmacist approach to assessment, categorization, and quality improvement.  
40 518 *Journal of the American Pharmacists Association*. 2017;57(6):711-6.  
41 519 41. Pereira F, Roux P, Santiago-Delefosse M, von Gunten A, Wernli B, Martins MM, et al.  
42 520 Optimising medication management for polymedicated home-dwelling older adults with multiple chronic  
43 521 conditions: a mixed-methods study protocol. *BMJ Open*. 2019;9(10):e030030.  
44 522 42. Benchimol EI, Smeeth L, Guttman A, Harron K, Moher D, Petersen I, et al. The REporting of  
45 523 studies Conducted using Observational Routinely-collected health Data (RECORD) Statement. *PLOS*  
46 524 *Medicine*. 2015;12(10):e1001885.  
47 525 43. Strasberg HR, Geiger G, Tudiver F. Moving towards an electronic patient record: A survey to  
48 526 assess the needs of an academic family practice unit. Waegemann CP, editor. Newton: Medical Records  
49 527 Institute; 1998. A434-A43 p.  
50 528 44. Surgical interventions clasification S. Swiss classification of surgical interventions (CHOP).  
51 529 2016.  
52 530 45. Parker S, Prince A, Thomas L, Song H, Milosevic D, Harris MF. Electronic, mobile and  
53 531 telehealth tools for vulnerable patients with chronic disease: a systematic review and realist synthesis.  
54 532 *BMJ Open*. 2018;8(8).  
55 533 46. Olsen J. Register-based research: some methodological considerations. *Scandinavian journal of*  
56 534 *public health*. 2011;39(3):225-9.  
57 535 47. Taushanov Z, Verloo H, Wernli B, Di Giovanni S, von Gunten A, F P. Transforming a patient  
58 536 registry into a customised dataset for the advanced statistical analysis of health risk factors and for  
59 537 medication-related hospitalisation research: a retrospective hospital patient registry study. *JMIR Medical*  
60 538 *Informatics*. 2021.  
539 539 48. Andrade C. Age as a variable: Continuous or categorical? *Indian J Psychiatry*. 2017;59(4):524-5.

- 1  
2  
3  
4 540 49. WHO. The Anatomical Therapeutic Chemical Classification System with Defined Daily Doses  
5 541 (ATC/DDD) Geneva: World Health Organization; 2014 [24 March 2020]. Available from:  
6 542 <http://www.who.int/classifications/atcddd/en/>.
- 7 543 50. Goldstein H. Nonlinear Multilevel Models, with an Application to Discrete Response Data.  
8 544 *Biometrika*. 1991;78(1):45-51.
- 9 545 51. Haider SI, Johnell K, Thorslund M, Fastbom J. Trends in polypharmacy and potential drug-drug  
10 546 interactions across educational groups in elderly patients in Sweden for the period 1992 - 2002. *Int J Clin*  
11 547 *Pharmacol Ther*. 2007;45(12):643-53.
- 12 548 52. Linkens AEMJH, Milosevic V, van der Kuy PHM, Damen-Hendriks VH, Mestres Gonzalvo C,  
13 549 Hurkens KPGM. Medication-related hospital admissions and readmissions in older patients: an overview  
14 550 of literature. *International Journal of Clinical Pharmacy*. 2020.
- 15 551 53. Berry JG, Gay JC, Joynt Maddox K, Coleman EA, Bucholz EM, O'Neill MR, et al. Age trends in  
16 552 30 day hospital readmissions: US national retrospective analysis. *BMJ*. 2018;360:k497.
- 17 553 54. Kongkaew C, Hann M, Mandal J, Williams SD, Metcalfe D, Noyce PR, et al. Risk factors for  
18 554 hospital admissions associated with adverse drug events. *Pharmacotherapy*. 2013;33(8):827-37.
- 19 555 55. Thunander Sundbom L, Bingefors K. Women and men report different behaviours in, and  
20 556 reasons for medication non-adherence: a nationwide Swedish survey. *Pharmacy practice*. 2012;10(4):207-  
21 557 21.
- 22 558 56. Manteuffel M, Williams S, Chen W, Verbrugge RR, Pittman DG, Steinkellner A. Influence of  
23 559 patient sex and gender on medication use, adherence, and prescribing alignment with guidelines. *J*  
24 560 *Womens Health (Larchmt)*. 2014;23(2):112-9.
- 25 561 57. Thunander Sundbom L, Hedborg K. Association between prescribed antidepressants and other  
26 562 prescribed drugs differ by gender: a nationwide register-based study in Sweden. *Nord J Psychiatry*.  
27 563 2019;73(1):73-9.
- 28 564 58. Silverstein MD, Qin H, Mercer SQ, Fong J, Haydar Z. Risk Factors for 30-Day Hospital  
29 565 Readmission in Patients  $\geq 65$  Years of Age. *Baylor University Medical Center Proceedings*.  
30 566 2008;21(4):363-72.
- 31 567 59. Schwab C, Hindlet P, Sabatier B, Fernandez C, Korb-Savoldelli V. Risk scores identifying  
32 568 elderly inpatients at risk of 30-day unplanned readmission and accident and emergency department visit:  
33 569 a systematic review. *BMJ Open*. 2019;9(7):e028302.
- 34 570 60. Jain S, Khera R, Mortensen EM, Weissler JC. Readmissions of adults within three age groups  
35 571 following hospitalization for pneumonia: Analysis from the Nationwide Readmissions Database. *PLOS*  
36 572 *ONE*. 2018;13(9):e0203375.
- 37 573 61. Hasegawa K, Gibo K, Tsugawa Y, Shimada YJ, Camargo CA, Jr. Age-Related Differences in  
38 574 the Rate, Timing, and Diagnosis of 30-Day Readmissions in Hospitalized Adults With Asthma  
39 575 Exacerbation. *Chest*. 2016;149(4):1021-9.
- 40 576 62. Shebeshi DS, Dolja-Gore X, Byles J. Unplanned Readmission within 28 Days of Hospital  
41 577 Discharge in a Longitudinal Population-Based Cohort of Older Australian Women. *International Journal*  
42 578 *of Environmental Research and Public Health*. 2020;17(9):3136.
- 43 579 63. Sud M, Yu B, Wijesundera HC, Austin PC, Ko DT, Braga J, et al. Associations Between Short  
44 580 or Long Length of Stay and 30-Day Readmission and Mortality in Hospitalized Patients With  
45 581 Heart Failure. *JACC: Heart Failure*. 2017;5(8):578-88.
- 46 582 64. Donzé J, Lipsitz S, Bates DW, Schnipper JL. Causes and patterns of readmissions in patients  
47 583 with common comorbidities: retrospective cohort study. *Bmj*. 2013;347:f7171.
- 48 584 65. Hijazi HH, Alyahya MS, Hammouri HM, Alshraideh HA. Risk assessment of comorbidities on  
49 585 30-day avoidable hospital readmissions among internal medicine patients. *J Eval Clin Pract*.  
50 586 2017;23(2):391-401.
- 51 587 66. Falvey JR, Bade MJ, Hogan C, Forster JE, Stevens-Lapsley JE. Preoperative Activities of Daily  
52 588 Living Dependency is Associated With Higher 30-Day Readmission Risk for Older Adults After Total  
53 589 Joint Arthroplasty. *Clin Orthop Relat Res*. 2020;478(2):231-7.
- 54 590 67. Greysen SR, Stijacic Cenzer I, Auerbach AD, Covinsky KE. Functional impairment and hospital  
55 591 readmission in Medicare seniors. *JAMA Intern Med*. 2015;175(4):559-65.
- 56 592 68. Pickens S, Naik AD, Catic A, Kunik ME. Dementia and Hospital Readmission Rates: A  
57 593 Systematic Review. *Dementia and Geriatric Cognitive Disorders Extra*. 2017;7(3):346-53.
- 58 594 69. Chiang LY, Liu J, Flood KL, Carroll MB, Piccirillo JF, Stark S, et al. Geriatric assessment as  
59 595 predictors of hospital readmission in older adults with cancer. *J Geriatr Oncol*. 2015;6(4):254-61.
- 60 596 70. Butcher L. Oncologists Seek to Understand, Address Hospital Readmissions. *Oncology Times*.  
61 597 2016;38(6):1,9-10.

598 71. Burhenn P, Sun C-L, Scher KS, Hsu J, Pandya P, Chui C-Y, et al. Predictors of hospital  
 599 readmission among older adults with cancer. *J Geriatr Oncol.* 2020;11(7):1108-14.  
 600 72. Leendertse AJ, Egberts ACG, Stoker LJ, van den Bemt PMLA, Group HS. Frequency of and  
 601 Risk Factors for Preventable Medication-Related Hospital Admissions in the Netherlands. *Archives of*  
 602 *Internal Medicine.* 2008;168(17):1890-6.  
 603 73. Leendertse AJ, Van Den Bemt PM, Poolman JB, Stoker LJ, Egberts AC, Postma MJ.  
 604 Preventable hospital admissions related to medication (HARM): cost analysis of the HARM study. *Value*  
 605 *Health.* 2011;14(1):34-40.  
 606 74. Garfinkel D, Bilek A. Inappropriate medication use and polypharmacy in older people. *BMJ.*  
 607 2020;369:m2023.  
 608 75. Tesfaye WH, Peterson GM, Castelino RL, McKercher C, Jose MD, Wimmer BC, et al.  
 609 Medication Regimen Complexity and Hospital Readmission in Older Adults With Chronic Kidney  
 610 Disease. *Annals of Pharmacotherapy.* 2019;53(1):28-34.  
 611 76. Fialová D, Onder G. Medication errors in elderly people: contributing factors and future  
 612 perspectives. *British journal of clinical pharmacology.* 2009;67(6):641-5.  
 613 77. Lavan AH, Gallagher PF, O'Mahony D. Methods to reduce prescribing errors in elderly patients  
 614 with multimorbidity. *Clinical interventions in aging.* 2016;11:857-66.

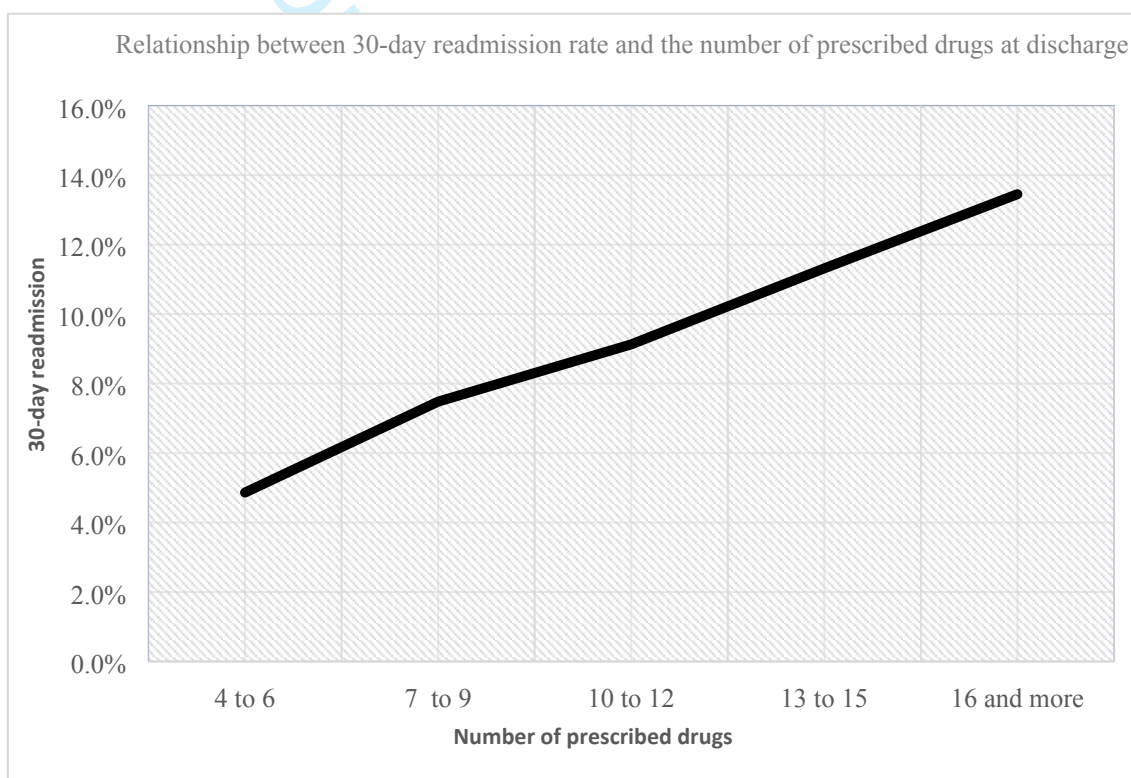

615  
 616 Figure 1. Relationship between 30-day readmission rate and the number of prescribed drugs at discharge.  
 617

618 Table 1. Descriptive statistics of drugs prescribed per patient (N = 13,802) at discharge based on the ATC  
 619 Classification System.

| Drug classes based on the ATC Classification System                 | Min-Max | Mean (SD)   |
|---------------------------------------------------------------------|---------|-------------|
| <i>First level, anatomical main group</i>                           |         |             |
| Blood and blood forming organs (B)                                  | 0-5     | 1.15 (0.86) |
| Dermatologicals (D)                                                 | 0-3     | 0.04 (0.21) |
| Genitourinary system and sex hormones (G)                           | 0-4     | 0.21 (0.47) |
| Systemic hormonal preparations, excl. sex hormones and insulins (H) | 0-4     | 0.20 (0.46) |



|                                                                           |             |                    |
|---------------------------------------------------------------------------|-------------|--------------------|
| Anti-infectives for systemic use (J)                                      | 0-4         | 0.24 (0.47)        |
| Antineoplastic and immunomodulating agents (L)                            | 0-5         | 0.05 (0.23)        |
| Musculo-skeletal system (M)                                               | 0-3         | 0.15 (0.39)        |
| Antiparasitic products, insecticides and repellents (P)                   | 0-2         | 0.02 (0.13)        |
| Respiratory system (R)                                                    | 0-7         | 0.28 (0.72)        |
| Sensory organs (S)                                                        | 0-6         | 0.10 (0.39)        |
| <i>Second level, therapeutic subgroup</i>                                 |             |                    |
| Stomatological preparations (A01)                                         | 0-1         | 0.00 (0.06)        |
| Drugs for acid-related disorders (A02)                                    | 0-3         | 0.56 (0.52)        |
| Drugs for functional gastrointestinal disorders (A03)                     | 0-3         | 0.07 (0.28)        |
| Antiemetics and antinauseants (A04)                                       | 0-1         | 0.01 (0.08)        |
| Bile and liver therapy (A05)                                              | 0-1         | 0.00 (0.05)        |
| Drugs for constipation (A06)                                              | 0-3         | 0.15 (0.40)        |
| Antidiarrhoeals, intestinal anti-inflammatory/anti-infective agents (A07) | 0-2         | 0.03 (0.18)        |
| Digestives, incl. Enzymes (A09)                                           | 0-2         | 0.02 (0.13)        |
| Drugs used in diabetes (A10)                                              | 0-5         | 0.26 (0.63)        |
| Vitamins (A11)                                                            | 0-4         | 0.15 (0.44)        |
| Mineral supplements (A12)                                                 | 0-3         | 0.29 (0.51)        |
| Other alimentary tract and metabolism products (A16)                      | 0-1         | 0.00 (0.05)        |
| Cardiac therapy drugs (C01)                                               | 0-4         | 0.14 (0.42)        |
| Antihypertensives (C02)                                                   | 0-2         | 0.02 (0.17)        |
| Diuretics (C03)                                                           | 0-3         | 0.27 (0.53)        |
| Peripheral vasodilators (C04)                                             | 0-1         | 0.00 (0.06)        |
| Vasoprotectives (C05)                                                     | 0-3         | 0.02 (0.14)        |
| Beta-blocking agents (C07)                                                | 0-2         | 0.46 (0.51)        |
| Calcium channel blockers (C08)                                            | 0-2         | 0.16 (0.37)        |
| Agents acting on the renin-angiotensin system (C09)                       | 0-3         | 0.64 (0.62)        |
| Lipid modifying agents (C10)                                              | 0-3         | 0.43 (0.52)        |
| Anaesthetics (N01)                                                        | 0-1         | 0.00 (0.05)        |
| Analgesics (N02)                                                          | 0-7         | 1.02 (0.91)        |
| Antiepileptics (N03)                                                      | 0-5         | 0.11 (0.35)        |
| Drugs for Parkinson's disease (N04)                                       | 0-5         | 0.04 (0.24)        |
| Psycholeptics (N05)                                                       | 0-6         | 0.53 (0.73)        |
| Psychoanaleptics (N06)                                                    | 0-3         | 0.20 (0.44)        |
| Other nervous system drugs(N07)                                           | 0-3         | 0.03 (0.19)        |
| <b>Total number of drugs</b>                                              | <b>5-30</b> | <b>8.95 (3.24)</b> |

620

621 Table 2. Prevalence of hospital 30-day readmissions at different periods for different age groups

622 (N = 13,802).

| Variables                               | 30-day hospital readmission | p-value |
|-----------------------------------------|-----------------------------|---------|
| Complete sample                         | 7.8%                        |         |
| Sex                                     |                             | *       |
| Women vs men                            | 7.3% vs 8.2%                |         |
| Year-end age, in years                  |                             | NS      |
| 65-69                                   | 7.5%                        |         |
| 70-79                                   | 7.6%                        |         |
| 80-89                                   | 8.4%                        |         |
| ≥ 90                                    | 6.4%                        |         |
| Mobility cluster:                       |                             | NS      |
| Preserved mobility vs impaired mobility | 7.6% vs 8.5%                |         |

|                                                    |      |               |     |
|----------------------------------------------------|------|---------------|-----|
| Activities in daily living (ADL):                  |      |               | NS  |
| Full ADL ability vs impaired ADL                   |      | 7.8% vs 7.2%  |     |
| Cognitive status:                                  |      |               | NS  |
| Preserved cognitive status vs cognitive impairment |      | 7.8% vs 7.9%  |     |
| ICD-10 diagnosis: circulatory problems             |      |               | **  |
| No vs Yes                                          |      | 8.2% vs 6.5%  |     |
| ICD-10 diagnosis: infection                        |      |               | NS  |
| No vs Yes                                          |      | 7.7% vs 9.9%  |     |
| ICD-10 diagnosis: respiratory problems             |      |               | NS  |
| No vs Yes                                          |      | 7.8% vs 8.0%  |     |
| ICD-10 diagnosis: trauma                           |      |               | **  |
| No vs Yes                                          |      | 8.0% vs 5.8%  |     |
| ICD-10 diagnosis: tumour                           |      |               | *** |
| No vs Yes                                          |      | 6.9% vs 15.1% |     |
| Number of ICD-10 conditions                        |      |               | *** |
|                                                    | 1    | 1.5%          |     |
|                                                    | 2    | 4.9%          |     |
|                                                    | 3    | 3.6%          |     |
|                                                    | 4    | 4.8%          |     |
|                                                    | 5    | 8.8%          |     |
| Number of surgical procedures (CHOP)               |      |               | *   |
|                                                    | 0    | 7.7%          |     |
|                                                    | 1    | 7.8%          |     |
|                                                    | 2    | 7.0%          |     |
|                                                    | 3    | 7.3%          |     |
|                                                    | 4    | 7.1%          |     |
|                                                    | 5    | 9.7%          |     |
| Year: 2015–2018                                    |      |               | NS  |
|                                                    | 2015 | 8.3%          |     |
|                                                    | 2016 | 8.0%          |     |
|                                                    | 2017 | 8.0%          |     |
|                                                    | 2018 | 6.8%          |     |

623 Note. \* =  $p < 0.05$ ; \*\* =  $p < 0.01$ ; \*\*\* =  $p < 0.001$ ; NS = non-significant

624

625 Table 3. Prevalence of readmission for different classes of drugs based on the ATC (N = 13,802).

| Drug class                                                              | 30-day readmission with NO drugs in this class | 30-day readmission with drugs in this class | p-value |
|-------------------------------------------------------------------------|------------------------------------------------|---------------------------------------------|---------|
| <i>First level, anatomical main group</i>                               |                                                |                                             |         |
| Blood and blood-forming organ drugs (B)                                 | 7.1%                                           | 8.0%                                        | NS      |
| Dermatologicals (D)                                                     | 7.7%                                           | 9.4%                                        | NS      |
| Genitourinary system and sex hormones (G)                               | 7.7%                                           | 8.3%                                        | NS      |
| Systemic hormonal preparations, excluding sex hormones and insulins (H) | 7.4%                                           | 9.5%                                        | ***     |
| Anti-infectives for systemic use (J)                                    | 8.0%                                           | 7.2%                                        | NS      |
| Antineoplastic and immunomodulating agents (L)                          | 7.6%                                           | 12.6%                                       | ***     |
| Drugs for the musculo-skeletal system (M)                               | 8.0%                                           | 6.5%                                        | *       |
| Antiparasitic products, insecticides, and repellents (P)                | 7.8%                                           | 6.6%                                        | ***     |
| Respiratory system drugs (R)                                            | 7.4%                                           | 9.9%                                        | ***     |
| Sensory organ drugs (S)                                                 | 7.8%                                           | 8.4%                                        | NS      |

| <i>Second level, therapeutic subgroup</i>                                 |      |       |     |
|---------------------------------------------------------------------------|------|-------|-----|
| Stomatological preparations (A01)                                         | 7.8% | 12.2% | NS  |
| Drugs for acid-related disorders (A02)                                    | 7.0% | 8.5%  | *** |
| Drugs for functional gastrointestinal disorders (A03)                     | 7.4% | 13.4% | *** |
| Antiemetics and antinauseants (A04)                                       | 7.7% | 27.7% | *** |
| Bile and liver therapy drugs (A05)                                        | 7.8% | 14.3% | NS  |
| Drugs for constipation (A06)                                              | 7.3% | 10.8% | *** |
| Antidiarrhoeals, intestinal anti-inflammatory/anti-infective agents (A07) | 7.7% | 12.9% | *** |
| Digestives, including enzymes (A09)                                       | 7.8% | 10.0% | NS  |
| Drugs used in diabetes (A10)                                              | 7.4% | 9.5%  | *** |
| Vitamins (A11)                                                            | 7.5% | 9.9%  | *** |
| Mineral supplements (A12)                                                 | 7.4% | 8.8%  | **  |
| Other alimentary tract and metabolism products (A16)                      | 7.8% | 6.3%  | NS  |
| Cardiac therapy (C01)                                                     | 7.6% | 8.9%  | NS  |
| Antihypertensives (C02)                                                   | 7.7% | 14.1% | *** |
| Diuretics (C03)                                                           | 7.2% | 9.8%  | *** |
| Peripheral vasodilators (C04)                                             | 7.8% | 15.2% | NS  |
| Vasoprotective drugs (C05)                                                | 7.8% | 9.8%  | NS  |
| Beta-blocking agents (C07)                                                | 7.1% | 8.6%  | *** |
| Calcium channel blockers (C08)                                            | 7.7% | 8.6%  | NS  |
| Agents acting on the renin-angiotensin system (C09)                       | 8.7% | 7.1%  | *** |
| Lipid-modifying agents (C10)                                              | 8.3% | 7.1%  | **  |
| Anaesthetics (N01)                                                        | 7.8% | 18.8% | *   |
| Analgaesics (N02)                                                         | 7.8% | 7.8%  | NS  |
| Antiepileptics (N03)                                                      | 7.7% | 9.0%  | NS  |
| Drugs for Parkinson's disease (N04)                                       | 7.8% | 6.9%  | NS  |
| Psycholeptics (N05)                                                       | 6.8% | 9.3%  | *** |
| Psychoanaleptics (N06)                                                    | 7.8% | 7.7%  | NS  |
| Other nervous system drugs (N07)                                          | 7.9% | 5.1%  | NS  |

626 Note. \* =  $p < 0.05$ ; \*\* =  $p < 0.01$ ; \*\*\* =  $p < 0.001$ ; NS = non-significant

627

628 Table 4. Baseline, multilevel, logistic regression model using 30-day readmission (0 = no; 1 = yes) as the  
 629 dependent variable associated with independent sociodemographic, LOS, and clinical variables  
 630 (N = 13,802 observations for 8,878 different participants).

| <b>Variables</b>                                          | <b>Odds Ratio<sup>3</sup></b> | <b>P &gt; z</b> | <b>95% CI<sup>4</sup></b> |
|-----------------------------------------------------------|-------------------------------|-----------------|---------------------------|
| Sex                                                       | 1.079                         | 0.285           | 0.938–1.242               |
| Year-end age, in years                                    | 0.999                         | 0.878           | 0.990–1.009               |
| Hospital length of stay (LOS), in days                    | 1.014                         | 0.000           | 1.006–1.021               |
| Mobility cluster <sup>1</sup>                             | 1.218                         | 0.015           | 1.039–1.427               |
| Dependency in the activities of daily living <sup>1</sup> | 0.794                         | 0.248           | 0.537–1.174               |
| Mental health status <sup>1</sup>                         | 0.992                         | 0.966           | 0.687–1.433               |
| CIM 1 diagnosis: circulatory problems <sup>2</sup>        | 0.938                         | 0.491           | 0.783–1.124               |
| CIM 1 diagnosis: infection <sup>2</sup>                   | 1.381                         | 0.078           | 0.964–1.977               |
| CIM 1 diagnosis: respiratory problems <sup>2</sup>        | 1.100                         | 0.414           | 0.875–1.382               |
| CIM 1 diagnosis: trauma <sup>2</sup>                      | 0.847                         | 0.265           | 0.633–1.134               |
| CIM 1 diagnosis: tumour <sup>2</sup>                      | 2.538                         | 0.000           | 2.089–3.082               |
| Number of CIM                                             | 1.419                         | 0.000           | 1.282–1.572               |

|                    |       |       |             |
|--------------------|-------|-------|-------------|
| Number of CHOP     | 0.978 | 0.304 | 0.938–1.020 |
| Number of drugs    | 1.043 | 0.000 | 1.028–1.058 |
| Year: 2015 to 2018 | 0.933 | 0.022 | 0.880–0.990 |
| Intercept          | .     | 0.027 | .           |

Note. 1: 0 = good state, 1 = impairment; 2: 0 = no, 1 = yes; 3: adjusted Odds ratio; 4:

Table 5. Multilevel logistic regression model results for the drugs prescribed to older patients at discharge home that had significant predictive values (odds ratios) for 30-day hospital readmission (controlled for variables in the baseline model: Table 4) (N = 13,802 observations for 8,878 different participants).

| Variables                                                               | Odds ratio <sup>1</sup> | <i>p</i> > <i>z</i> | 95% CI <sup>2</sup> |
|-------------------------------------------------------------------------|-------------------------|---------------------|---------------------|
| <i>First level, anatomical main group</i>                               |                         |                     |                     |
| Blood and blood-forming organs drugs (B)                                | 1.089                   | 0.041               | 1.003–1.181         |
| Systemic hormonal preparations, excluding sex hormones and insulins (H) | 1.207                   | 0.007               | 1.052–1.385         |
| Respiratory system drugs (R)                                            | 1.146                   | 0.003               | 1.046–1.254         |
| <i>Second level, therapeutic subgroup</i>                               |                         |                     |                     |
| Drugs for functional gastrointestinal disorders (A03)                   | 1.424                   | 0.001               | 1.166–1.739         |
| Antiemetics and antinauseants (A04)                                     | 3.216                   | 0.000               | 1.842–5.617         |
| Drugs for constipation (A06)                                            | 1.195                   | 0.018               | 1.031–1.386         |
| Drugs used in diabetes (A10)                                            | 1.125                   | 0.021               | 1.018–1.243         |
| Vitamins (A11)                                                          | 1.201                   | 0.008               | 1.049–1.374         |
| Antihypertensives (C02)                                                 | 1.771                   | 0.000               | 1.287–2.438         |
| Diuretics (C03)                                                         | 1.149                   | 0.024               | 1.018–1.296         |
| Beta-blocking agents (C07)                                              | 1.156                   | 0.040               | 1.007–1.327         |
| Lipid-modifying agents (C10)                                            | 0.841                   | 0.015               | 0.732–0.967         |
| Psycholeptics (N05)                                                     | 1.130                   | 0.009               | 1.031–1.238         |

Note. 1 = adjusted odds ratio; 2 = CI or Confidence Interval

Table 6. Drugs and drugs interactions from ATC classes A and B with a significant risk of 30-day hospital readmission (controlled for variables in the baseline model: Table 4) (N = 13,802 observations for 8,878 different participants).

| Variables                                                               | Odds ratio <sup>1</sup> | <i>p</i> > <i>z</i> | 95% CI <sup>2</sup> |
|-------------------------------------------------------------------------|-------------------------|---------------------|---------------------|
| <i>First level, anatomical main group</i>                               |                         |                     |                     |
| Blood and blood-forming organ drugs (B)                                 | 1.089                   | 0.040               | 1.004–1.182         |
| Systemic hormonal preparations, excluding sex hormones and insulins (H) | 1.210                   | 0.007               | 1.054–1.390         |
| Respiratory system drugs (R)                                            | 1.149                   | 0.003               | 1.049–1.258         |
| <i>Second level, therapeutic subgroup</i>                               |                         |                     |                     |
| Antiemetics and antinauseants (A04)                                     | 3.222                   | 0.000               | 1.844–5.630         |



|                                                                       |       |       |             |
|-----------------------------------------------------------------------|-------|-------|-------------|
| Drugs for functional gastrointestinal disorders (A03)                 | 1.428 | 0.000 | 1.169–1744  |
| Beta-blocking agents (C07) and drugs for acid-related disorders (A02) | 1.367 | 0.022 | 1.046–1.788 |
| Drugs for constipation (A06)                                          | 1.199 | 0.017 | 1.033–1.392 |
| Agents acting on the renin-angiotensin system (C09)                   | 0.892 | 0.049 | 0.796–0.999 |
| Lipid-modifying agents (C10)                                          | 0.838 | 0.013 | 0.729–0.964 |

645 Note. 1: adjusted odds ratio; 2: CI = Confidence Interval

For peer review only

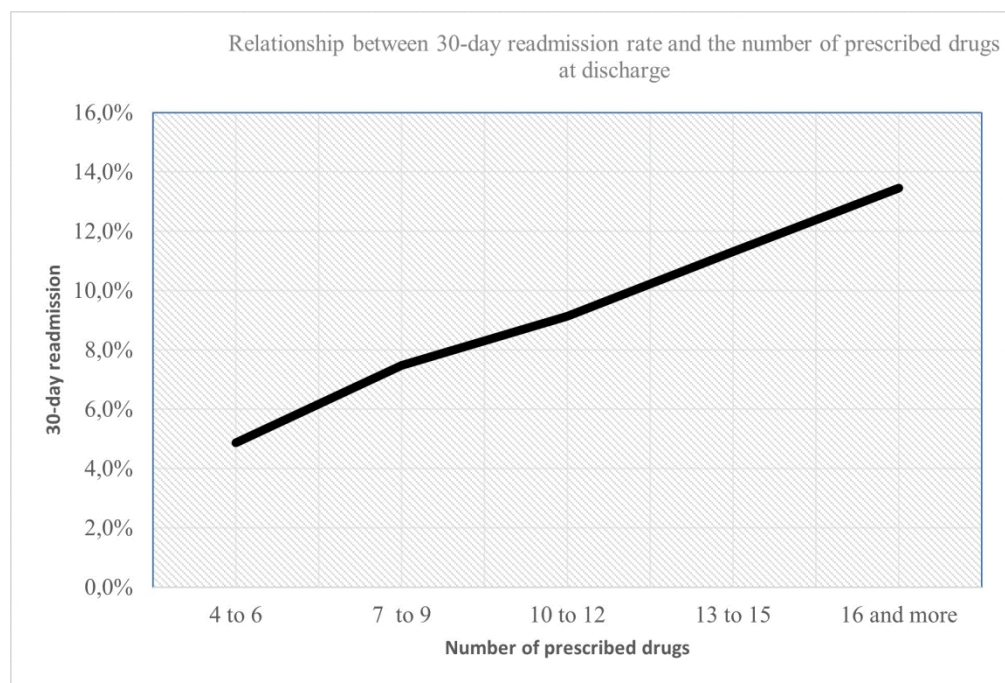

28  
29  
30  
31  
32  
33  
34  
35  
36  
37  
38  
39  
40  
41  
42  
43  
44  
45  
46  
47  
48  
49  
50  
51  
52  
53  
54  
55  
56  
57  
58  
59  
60

Figure 1. Relationship between 30-day readmission rate and the number of prescribed drugs at discharge.

688x467mm (72 x 72 DPI)

# BMJ Open Optimising medication management for polymedicated home-dwelling older adults with multiple chronic conditions: a mixed-methods study protocol

Filipa Pereira <sup>1,2</sup>, Pauline Roux,<sup>3</sup> Marie Santiago-Delefosse,<sup>3</sup> Armin von Gunten,<sup>4</sup> Boris Wernli,<sup>5</sup> Maria Manuela Martins,<sup>2,6</sup> Henk Verloo<sup>1,4</sup>

**To cite:** Pereira F, Roux P, Santiago-Delefosse M, *et al.* Optimising medication management for polymedicated home-dwelling older adults with multiple chronic conditions: a mixed-methods study protocol. *BMJ Open* 2019;9:e030030. doi:10.1136/bmjopen-2019-030030

► Prepublication history and additional material for this paper are available online. To view these files, please visit the journal online (<http://dx.doi.org/10.1136/bmjopen-2019-030030>).

Received 23 February 2019  
Revised 17 August 2019  
Accepted 03 October 2019

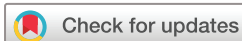

© Author(s) (or their employer(s)) 2019. Re-use permitted under CC BY-NC. No commercial re-use. See rights and permissions. Published by BMJ.

For numbered affiliations see end of article.

## Correspondence to

Filipa Pereira;  
filipa.pereira@hevs.ch

## ABSTRACT

**Introduction** Optimal medication management is one of the basic conditions necessary for home-dwelling older adults living with multiple chronic conditions (OAMCC) to be able to remain at home and preserve their quality of life. Currently, the reasons for such high numbers of emergency department visits and the very significant rate of hospitalisations for OAMCC, due to medication-related problems (MRPs), is poorly explored. This study aims to reveal the current state of the medication management practices of polymedicated, home-dwelling OAMCC and to make proposals for improving clinical and medication pathways through an innovative and integrated model for supporting medication management and preventing adverse health outcomes.

**Methods and analysis** A mixed-methods study will address the medication management of polymedicated, home-dwelling OAMCC. Its explanatory sequential design will involve two major phases conducted sequentially over time. The quantitative phase will consist of retrospectively exploiting the last 5 years of electronic patient records from a local hospital (N ≈ 50 000) in order to identify the different profiles—made up of patient-related, medication-related and environment-related factors—of the polymedicated, home-dwelling OAMCC at risk of hospitalisation, emergency department visits, hospital readmission (notably for MRPs), institutionalisation or early death. The qualitative study will involve: (a) obtaining and understanding the medication management practices and experiences of the identified profiles extracted from the hospital data of OAMCC who will be interviewed at home (N ≈ 30); (b) collecting and analysing the perspectives of the formal and informal caregivers involved in medication management at home in order to cross-reference perspectives about this important dimension of care at home. Finally, the mixed-methods findings will enable the development of an innovative, integrated model of medication management based on the Agency for Clinical Innovation framework and Bodenheimer and Sinsky's quadruple aim.

**Ethics and dissemination** Ethical approval has been obtained from the Human Research Ethics Committee of the Canton Vaud (2018-02196). Findings will be disseminated in peer-reviewed journals, professional conferences and other knowledge transfer activities with primary healthcare providers, hospital care units, informal caregivers' and patients' associations.

## Strengths and limitations of this study

- This mixed methodology will rely on a closely coordinated combination of methods and on the utilisation of valuable existing data underexploited to date (patients' electronic hospital records and Resident Assessment Instrument-Home Care (RAI-HC) data).
- The investigation draws on an interprofessional and interdisciplinary approach, which associates general practitioners, community healthcare nurses, pharmacists and researchers in health psychology, old age psychiatry, nursing and survey methodology.
- Our findings will contribute to the development of an evidence-based and innovative, cooperative model of medication management for polymedicated, home-dwelling older adults with multiple chronic conditions.
- Although patients' electronic hospital records and RAI-HC data provide a broad range of patient-related, medication-related and environment-related information, they rarely highlight factors that may influence the occurrence of medication-related problems.

## INTRODUCTION

The number of older adults living at home with multiple chronic conditions (OAMCC) rises considerably around the world and has been estimated to affect 25.2% of people aged from 65 to 79% and 41.3% of those aged 80 and over.<sup>1</sup> Multiple chronic conditions is a comprehensive concept used to properly cover the diverse definitions of multimorbidity<sup>2 3</sup> and therefore the complexity of older adults' health statuses. The concept encompasses the simultaneous presence of an individual's diseases and their chronic physical, mental or behavioural health problems requiring ongoing management over years or decades.<sup>4</sup>

These long-term health conditions require taking multiple medications,<sup>5</sup> known as polypharmacy (PP) when the daily intake

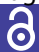

corresponds to five or more medicines.<sup>6</sup> PP places older adults at higher risk of medication-related problems (MRPs), including adverse medication reactions, medication errors and potentially inappropriate medications.<sup>7,8</sup> Potentially inappropriate medications are the intake of medicines for which the associated risks outweigh the potential benefits, particularly when more effective alternatives are available.<sup>9</sup> Consequently, MRPs can lead to a degradation of the patient's clinical condition, physical and cognitive decline, an exacerbation of chronic medical conditions and avoidable health costs.<sup>10,11</sup> Moreover, up to 25% of emergency department visits by home-dwelling OAMCC are due to MRPs.<sup>10</sup> However, 60% of MRPs in patients visiting the emergency department with non-specific complaints (such as weakness) may go undiagnosed, whereas 83% of those MRPs may be responsible for acute morbidity.<sup>10</sup> MRPs are also a frequent cause of readmission, and they were the most frequent cause in one study that followed older patients for 6 months after hospital discharge.<sup>12</sup> Care-coordination problems, associated with low or suboptimal medication management, are all the more evident in the sensitive period of discharge home from hospital.<sup>11,13</sup> The complexity of OAMCC's care needs leads them to be significant users of health services and to consult many different healthcare professionals.<sup>14</sup> The number of healthcare professionals consulted by home-dwelling OAMCC has been directly associated with fragmented and uncoordinated care.<sup>13</sup> Moreover, different healthcare professionals may have different treatment preferences. Failure to coordinate care among home-dwelling OAMCC contributes to MRPs.<sup>13</sup>

In addition to the role of healthcare professionals in medication management, informal caregivers play a vital role in ensuring safe and appropriate medication use by home-dwelling OAMCC, especially among those who may also have cognitive impairment.<sup>15–17</sup> Despite the important role of informal caregivers in medication management, several complications to do with their activities have been documented in relation to the time spent, anxiety making a mistake and the uncooperative behaviour of the home-dwelling OAMCC.<sup>18</sup> They are also confronted with difficulties in maintaining continuous supplies of medication, assisting with administration, making clinical judgements (eg, in response to side effects and about over-the-counter medication), and solving conflictual communications or disagreements with the older adult,<sup>18</sup> or even with healthcare professionals, with regard to ineffective and addictive medication practices.<sup>15,18</sup>

Nonetheless, many MRPs are preventable.<sup>8,10,19</sup> Studies about medicine-related hospitalisations suggest that up to 58% may be preventable with appropriate primary care.<sup>8</sup> An essential strategy for medicine-related hospitalisations prevention and medication safety is medication reconciliation—the process of creating and maintaining a single list of the patient's current list of medications.<sup>20</sup> This process allows a systematic and comprehensive review of all the medications the patient is taking, reducing

medication errors by a consistent communication across transitions of care.<sup>21</sup>

Therefore, optimising medication management among home-dwelling OAMCC requires regular monitoring of MRPs, interprofessional collaboration across different health and social care providers, organisations and departments<sup>13</sup> and medication reconciliation at every transition of care including changes in the clinical setting, practitioner or level of care.<sup>22</sup>

### Aim and objectives

This study's aim is to document the current state of medication management practices of polymedicated, home-dwelling OAMCC and to make proposals for improving evidence-based clinical and medication pathways through an innovative, integrated model intended to support medication management and to prevent adverse health outcomes related to MRPs (recurrent hospitalisation, emergency department visits, institutionalisation in nursing homes and early death). To achieve this aim, three main objectives will guide this project:

The first objective is to carry out a *retrospective analysis of patients'* hospital records, their medication and environment-related factors in order to identify those that increase the risk of hospitalisation, emergency department visits, hospital readmission (notably due to MRPs), institutionalisation or early death, among home-dwelling polymedicated OAMCC—factors that prevent OAMCC from staying at home.

The second objective is to use a *prospective qualitative study* to explore and better understand *the medication experiences and practices of home-dwelling OAMCC with different profiles*. We seek to identify the skills and strategies developed by them to manage polymedication within their social contexts and health trajectories despite possible cognitive impairment and particularly after a recent hospitalisation.

The third objective is to better understand the *roles and coordination of the different caregivers involved in the medication management of home-dwelling OAMCC*. We seek to investigate the perspectives of both professional caregivers (community healthcare nurses, pharmacists, general practitioners or specialist physicians) and non-professional/informal caregivers (family members, friends or neighbours).

## METHODS

### Study design

To enable us to meet our objectives, a mixed-methods study will address the medication management of polymedicated, home-dwelling OAMCC.<sup>23</sup> Two major phases will be conducted sequentially from February 2019 to January 2022: a quantitative data collection phase followed by a qualitative phase. The reasons for using an explanatory sequential design are, first, that existing data in electronic patient records from a local hospital will enable us to identify profiles affected by similar



1 patient-related, medication-related and environment-related factors among the polymedicated, home-dwelling OAMCC at risk of hospitalisation, emergency department visits, hospital readmission (notably due to MRPs), institutionalisation or early death. Second, the identified profiles extracted from the hospital data will allow proceeding to a purposive sampling—of those polymedicated, home-dwelling OAMCC who present with more risk factors—for the qualitative data collection focused on medication management at home. Thus, the analysis of the results from the retrospective quantitative phase will be integrated with the data collected from the prospective qualitative phase. Finally, phase 3 will develop a Medication Management Model based on interpreting the quantitative and qualitative findings.

### Phase 1: retrospective quantitative analysis

To fulfil the first objective, the purpose of the quantitative phase is to identify the different profiles—made up of patient-related, medication-related and environment-related factors—of the polymedicated, home-dwelling OAMCC at risk of hospitalisation, emergency department visits, hospital readmission (notably for MRPs), institutionalisation in nursing homes or early death (before the average age of death described by the Organisation for Economic Cooperation and Development in 2018).<sup>24</sup> A systematic, retrospective chart analysis of the electronic patient records from a local hospital over the last 4 years using the evidence-based methodology developed by Vassar and Holzmann will provide substantial clinical information.<sup>25</sup> Motheral *et al*'s standardised extraction sheets will be adapted to explore and assess the data of older inpatients or emergency department-visiting home-dwelling older adults.<sup>26</sup> The 4-year analysis was selected based on the availability of systematic, well-coded patient data using the Swiss-Diagnostic Related Groups<sup>27</sup> and the Swiss Classification of Surgical Interventions (CHOP).<sup>28</sup>

### Research population

All home-dwelling OAMCC with somatic and/or mental health disorders who were hospitalised, rehospitalised or who consulted the emergency department (for MRPs or other reasons) at the partner hospital between 2015 and 2018 (estimated n=50 000) will be included. The estimated sample of 50 000 older adults' electronic inpatient charts are part of the 40 000 yearly adult inpatients in acute care units and more than 40 000 adult emergency department consultations yearly at the partner hospital. To explore generalisability, we will compare their sociodemographic and health status characteristics with those of the national sample of hospitalised older adults in Swiss hospitals for the same period.

### Data collection

Data from the hospitalisation and emergency admissions databases will be collected on patient-related, medication-related and environment-related factors that could have influenced the occurrence of MRPs that resulted in

hospitalisation, rehospitalisation or emergency department admission.

Patient-related factors comprise sociodemographic characteristics, the International Classification of Diseases 10th version (ICD-10) diagnostics (main diagnosis and comorbidities), the Swiss Classification of Surgical Interventions (CHOP) category and the reason for hospitalisation, rehospitalisation or emergency department admission. Supplementary filters will be added to discriminate polymedication, multimorbidity (secondary ICD-10 diagnosis), physical and cognitive impairment documented in the clinical data files (Function Independence Measure, Mini-Mental State Examination and Activities of Daily Living).

Medication-related factors include the number, types and changes in medication at admission, during hospitalisation and at discharge.

Environment-related factors include the presence of formal and/or informal caregivers, patient's provenance (rural or urban), hospital pathways (wards and eventual transfers), length of stay, readmissions (number of admissions in the previous year, 30-day readmission and unplanned readmission), discharge destination and, potentially, death during hospitalisation. A unique patient identification number will allow us to analyse rehospitalisations via the emergency department during the period from 2015 to 2018. Retrospective data collection began in April 2019.

### Data analyses

The data set of polymedicated, home-dwelling OAMCC will be analysed using multivariate regression analysis, in order to identify the patient-related, medication-related and environment-related factors that can increase the risk of hospitalisation, emergency department visits, readmission (notably due to MRPs), institutionalisation or early death. Furthermore, the profiles of polymedicated, home-dwelling OAMCC hospitalised or visiting the emergency department due to MRPs, and identified via multicluster analysis, will serve to guide the qualitative study and lead to a purposive sampling of polymedicated, home-dwelling OAMCC presenting with more risk factors. A draft of the cluster analysis strategy is available as an online supplementary file.

### Phase 2: prospective patient-centred qualitative analysis

To meet the second and third objectives, a qualitative investigation, based on purposive sampling, will draw on work done in a feasibility study.<sup>29</sup> This qualitative investigation will consist of collecting and understanding the medication practices and experiences of OAMCC presenting with the risk factors identified in the first phase. The focus will be on identified OAMCC who were recently hospitalised and are at risk of hospital readmission. The older adult will be interviewed at home on two separate occasions. This methodology is a way to analyse changes in their medication practises and their experiences following their recent hospitalisation. The data

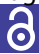

collection tools include a walking-interview<sup>30</sup> based on a medication journal and household photographs of where medication is stored. This allows us to focus on the tangible practices of OAMCC and contextualises them within the private space of their daily lives.

To discriminate the older adults' health profile, we will use the Resident Assessment Instrument-Home Care (RAI-HC) introduced by the Swiss Association for Home Care Services for all home care services in 2004. Based on a comprehensive geriatric assessment, the RAI-HC both allows for the establishment of an individualised care plan and generates quality indicators, plans resource use, optimises the medication management process by monitoring and documenting the number and types of medication and the persons involved in preparing medication, and regularly assesses adherence to the medication prescribed.<sup>31</sup> This instrument will provide information on the patient-related, medication-related and environment-related factors which may influence the occurrence of MRPs, and it will be used to recruit OAMCC at risk of or already presenting with MRPs.

Furthermore, we will also collect and analyse the perspectives of the formal and informal caregivers involved in medication management at home to cross-reference perspectives about this important dimension of care at home.

### Research population

The profiles of the polymedicated OAMCC hospitalised/rehospitalised or consulting the emergency department, as identified in the retrospective investigation, will be used to select participants for the qualitative investigation. A theoretical, purposive sampling will be carried out. Based on Guest *et al*, the principal investigator will

recruit about 30 polymedicated OAMCC (until saturation of data), all recently hospitalised (within the last 90 days) and at risk of hospital readmission.<sup>32</sup> For each OAMCC participant, an informal caregiver will also be integrated into the investigation. We defined informal caregivers as any family member, neighbour or friend assisting a dependent older adult with certain activities in their daily life. That assistance, help, care or physical presence must be given on a regular basis, for at least two basic activities or instrumental activities of daily living or to ensure patient safety, and for 6 months or more.<sup>33</sup> The informal caregiver will be included in the study if the recruited older adult identifies that person as being significant in their medication management and if they give informed written consent to participate.

Furthermore, a formal caregiver will be integrated into the investigation for each participant. Professional caregivers are those employed to provide professional healthcare services (ie, nurses, nursing assistants, general practitioners, pharmacists and social workers). They will be included in the study if the recruited OAMCC identifies them as the professional most involved in their medication management.

Table 1 presents the specific inclusion/exclusion criteria for each group of participants.

### Participant recruitment

Polymedicated, home-dwelling OAMCC will be recruited via two paths so that all of the participants meet the eligibility criteria and fit corresponding profiles established in the quantitative phase. Some OAMCC will be receivers of care from Community Healthcare Centres and others will be functioning without that day-to-day support.

**Table 1** Phase 2 inclusion and exclusion criteria

| Participants           | Inclusion criteria                                                                                                                                                                                                                                                                                                                                                                                                                                                                      | Exclusion criteria                                                                          |
|------------------------|-----------------------------------------------------------------------------------------------------------------------------------------------------------------------------------------------------------------------------------------------------------------------------------------------------------------------------------------------------------------------------------------------------------------------------------------------------------------------------------------|---------------------------------------------------------------------------------------------|
| OAMCC                  | <ul style="list-style-type: none"> <li>▶ Aged 65 or above</li> <li>▶ Man or woman</li> <li>▶ Hospitalised within the last 90 days</li> <li>▶ Managing at least five different medications (prescribed and over-the-counter medications explored during recruitment)</li> <li>▶ Suffering from multiple chronic conditions<sup>4</sup></li> <li>▶ Living alone or in a couple, in a rural or urban area</li> <li>▶ With or without support from a Community Healthcare Centre</li> </ul> | <ul style="list-style-type: none"> <li>▶ Not able to speak and understand French</li> </ul> |
| Informal caregiver     | <ul style="list-style-type: none"> <li>▶ Designated by the OAMCC as the most significant informal caregiver involved in medication management</li> <li>▶ Aged 18 or above</li> </ul>                                                                                                                                                                                                                                                                                                    | <ul style="list-style-type: none"> <li>▶ Not able to speak and understand French</li> </ul> |
| Professional caregiver | <ul style="list-style-type: none"> <li>▶ Designated by the OAMCC as having a key role in medication management</li> </ul>                                                                                                                                                                                                                                                                                                                                                               | <ul style="list-style-type: none"> <li>▶ Student</li> <li>▶ Apprentice</li> </ul>           |

OAMCC, older adults living with multiple chronic conditions.

- ▶ For OAMCC who do not receive support from a Community Healthcare Centre, recruitment will be based on variables in their patient files and carried out in collaboration with different nursing departments from the partner hospital.
- ▶ For OAMCC who do receive support from a Community Healthcare Centre, recruitment will be based on the clinical and health data documented in the RAI-HC and carried out in collaboration with community healthcare nurses from Sion Community Healthcare Centre.

Research nurses partnering the project, from a hospital or a Community Healthcare Centre, will briefly explain the study to the patient. Potential participants will be asked for permission to give their name to the researchers. The principal investigator will contact the older adult by telephone during the week following hospital discharge and ask for their agreement to participate in the study. In case of agreement, a first meeting will be organised at the older adult's home in the next few days. Participant recruitment will start in October 2019.

#### Data collection from OAMCC

During the first home meeting with the OAMCC, the principal investigator will provide all the study details and will suggest two semistructured interviews, each lasting about an hour, starting on the first meeting and spaced 2–3 weeks apart. According to participants' levels of tiredness, it may be necessary to subdivide the interviews. The older adult will be invited to sign the informed written consent form, allowing the researcher to collect sociodemographic and health data (RAI-HC and the patient's hospital records). Eligible home-dwelling OAMCC from both recruitment paths will be screened using the RAI-HC Minimal Data Set (MDS), which includes information on polymedication (section P), multiple chronic conditions (sections J and K) and recent hospitalisation (section Ac). Research team members trained on the RAI-HC will also carry out this evaluation for participants who do not have an RAI-HC. The following multidimensional clinical data will be retrieved from the RAI-HC MDS: cognitive status, hearing, vision, mood status, functional and physical status, continence, healthcare problems and nutritional state. The MDS will aid interviews with OAMCC and the exploration of the facilitators and barriers to daily medication management.

The first semistructured interview will collect the perspectives of OAMCC with regard to their medication management, the return home, information received about their treatment and its possible modifications, whether their opinions and preferences were taken into account in the prescription of medications, and the informal and professional caregivers involved. OAMCCs will be interviewed alone or with an informal caregiver, if necessary. The principal investigator will then ask the participant to complete a week-long medication journal,<sup>34 35</sup> either alone or with the help from informal or professional caregivers, emphasising that any

information on daily medication routines is helpful, even if the OAMCC feels unable to complete the journal for the full 7 days. The instructions will mention the importance of noting all the medicines taken—those prescribed by general practitioners or specialist physicians, but also any others taken at their own initiative (over-the-counter medications). Participants will be asked to note their perceptions of and satisfaction with their treatment in a week-long medication journal. This will provide information on the daily routines associated with the participant's medication and will form the basis of the second interview.

The second interview will be based on the participant's medication journal and will take the form of a walking-interview<sup>36</sup> using household photographs.<sup>35</sup> The principal investigator will ask the participant to explain their medication practises while pointing out the locations within their home where drugs are stored, prepared and taken. The hypothesis underlying this methodology is that the physical presence of drugs promotes discussion.<sup>37 38</sup> We will identify and photograph, with the participants' agreement, the places where medication, contact details for medical professionals and other information are stored as well as the locations of any other objects involved in daily care practises. The collection and analysis of photographs provide a better understanding of the complexity of medication management in home settings. They help to capture the interviewee's concerns or strategies when they are pointed out to the interviewer. The interview guide will also investigate the issue of self-medication in order to reveal the extent and influence of this practice.

#### Data collection from informal caregivers

Sociodemographic data and information related to medication management will be collected. When possible and appropriate, a joint third interview<sup>39</sup> with the OAMCC and their principal informal caregiver<sup>34</sup> will be organised at the older adult's home 1–2 weeks after the walking interview. This type of interview provides access to the interactions between OAMCC and their informal caregivers with regard to medication management. We hypothesise that the main informal caregiver is deeply involved in the older adult's experience of medication management, but the caregiver's ideas about this may be similar to, overlapping with or different from those of an OAMCC.

#### Data collection from professional caregivers

A semistructured interview of about 1 hour will be conducted with a professional caregiver in order to explore their point of view on the OAMCC's medication management and other issues associated with the return home after hospitalisation. In agreement with the project's field partners and stakeholders, these interviews will take place in professionals' workplaces (Community Healthcare Centre, medical practice office or pharmacy), during working hours, 1–2 weeks after the interview with the OAMCC and their informal caregiver.



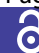

### Qualitative data analyses

A database will be prepared using the RedCap software platform to record and store the participants' sociodemographic, health and interview data. Information on their health statuses will be collected using the RAI-HC data and will be analysed using the IBM-Statistical Package for Social Sciences V.25.0.

Data collected via the interviews will be examined according to an analytical plan that integrates and compares two different methods. First, thematic content analysis,<sup>40 41</sup> using NVivo V.12 software, will be used to identify the themes emerging from the data, and this will provide a rich, detailed account of the data set. Themes will be compared by different members of the analysis team until a consensus is reached. Second, lexicometric analysis, using Iramuteq software—a technique derived from the Alceste method<sup>42</sup>—will allow a very fine exploration, both within each interview and across the whole corpus of interviews, of the structures underlying the discourse. Each older adult's medication journal will be analysed and categorised according to the same principles as the interviews. The data collected from these documents will be put into perspective by the analysis of the interviews. In the final data analysis, links will be made between the interviews, the medication journal, the older adult's RAI-HC data and the photos of the medicines' locations.

### Phase 3: development of a medication management model

Connecting retrospective and prospective findings, using an explanatory sequential design and participants' different perspectives, will contribute to a deep understanding of the current state of medication management practices of polymedicated, home-dwelling OAMCC. This mixed-methods study corresponds to the 'diagnostic' phase of the process of developing a Model of Care, as presented by the Agency for Clinical Innovation (ACI).<sup>43</sup> It will guide the 'solution design' phase—the next step in the creation of an innovative, integrated model for supporting medication management and preventing adverse health outcomes. In addition to the ACI's framework, the development of a proposed Medication Management Model will consider the quadruple aim of enhancing the patient's experience, improving population health, reducing costs and improving the working lives of healthcare providers.<sup>44</sup>

Finally, our mixed-methods research findings will be completed with those of an ongoing systematic review of Medication Management Models.<sup>45</sup>

The study phase outcomes are summarised in [table 2](#).

### Patient and public involvement

This study and the feasibility study on which it is based were developed in collaboration with representatives from a Community Healthcare Centre, a regional hospital, medical and pharmacy associations and an informal caregivers association. They shared their expertise on the study's relevance and the feasibility of data collection with

**Table 2** Outcomes for each study phase

|                  |                                                                                                                                                                                                                                                                                                                                                                                                                                                                                                                                                                                                                                                                                                                                                                                                                                                                                                                                                                                                                                                                                                                                                                                           |
|------------------|-------------------------------------------------------------------------------------------------------------------------------------------------------------------------------------------------------------------------------------------------------------------------------------------------------------------------------------------------------------------------------------------------------------------------------------------------------------------------------------------------------------------------------------------------------------------------------------------------------------------------------------------------------------------------------------------------------------------------------------------------------------------------------------------------------------------------------------------------------------------------------------------------------------------------------------------------------------------------------------------------------------------------------------------------------------------------------------------------------------------------------------------------------------------------------------------|
| Phase 1 outcomes | Patient-related, medication-related and environment-related factors which can increase the risk of hospitalisation, emergency department visits, hospital readmission (notably due to MRPs), institutionalisation or early death. Profiles of polymedicated, home-dwelling OAMCC hospitalised or visiting the emergency department due to MRPs based on the previously identified patient-related, medication-related and environment-related factors.                                                                                                                                                                                                                                                                                                                                                                                                                                                                                                                                                                                                                                                                                                                                    |
| Phase 2 outcomes | <p>For OAMCC participants:</p> <ul style="list-style-type: none"> <li>▶ Patient-related, medication-related and environment-related factors for MRPs (defined by phase 1's outcomes) extracted from the RAI-HC MDS and the patient's electronic hospital records (number and types of medication, multiple chronic conditions, recent hospitalisations, cognitive status, hearing, vision, mood status, functional and physical status, continence, healthcare problems and nutritional state).</li> <li>▶ Medication practices and experiences of OAMCC following their recent hospitalisation, facilitators/barriers to medication management, informal and professional caregivers involved.</li> </ul> <p>For informal caregivers:</p> <ul style="list-style-type: none"> <li>▶ Sociodemographic profiles.</li> <li>▶ Practices and experiences related to medication management.</li> </ul> <p>For professional caregivers:</p> <ul style="list-style-type: none"> <li>▶ Sociodemographic and professional profiles.</li> <li>▶ Role and perspectives on OAMCC medication management.</li> <li>▶ Coordination activities related to returning home after hospitalisation.</li> </ul> |
| Phase 3 outcomes | <p>Three first steps in the process of developing a Model of Care<sup>43</sup>:</p> <ul style="list-style-type: none"> <li>▶ 'Project initiation'.</li> <li>▶ 'Diagnostic'.</li> <li>▶ 'Solution design' considering the quadruple aim.</li> </ul> <p>Proposals for the Medication Management Model's 'Implementation' and 'Sustainability' steps<sup>43</sup> to support medication management and to prevent adverse health outcomes related to MRPs.</p>                                                                                                                                                                                                                                                                                                                                                                                                                                                                                                                                                                                                                                                                                                                               |

MDS, Minimal Data Set; MRPs, medication-related problems; OAMCC, older adults living with multiple chronic conditions; RAI-HC, Resident Assessment Instrument-Home Care.

the research team. Patients' priorities, experiences and preferences, collected during the feasibility study, were the drivers for the development of the research question and outcome measures.

A steering committee will involve these different actors at various stages in the project, both to contribute to data collection and to provide their expertise to the coconstruction of a Medication Management Model and its future implementation. As regards data collection, the hospital's medical informatics department will provide the appropriate data based on a data extraction protocol (phase 1) and the Community Healthcare



Centre will help with OAMCC recruitment and access to participants' RAI-HC and professional caregivers (phase 2).

Results will be disseminated to study participants through presentations to associations of patients and informal caregivers and at professional training sessions.

## ETHICS AND DISSEMINATION

With the approval, the medical informatics department of partner hospital will provide the appropriate data for the retrospective phase based on a data extraction protocol. Extracted data will be delivered and stored in the ReDCap data platform via a secure coded data file. In coherence with the Data Management Plan submitted to the Swiss National Science Foundation, the collected data will be securely stored for future research.

The autonomy of the participants will be respected. Participation in the prospective phase in this research is free. It will be possible for participants to refuse to record the interview or to request the deletion of the recorded data. Participating in a structured effort to understand medication practises and the posthospital return home experience can contribute to improvements in health management in the community at large, and particularly in the area of home support.

Findings will be disseminated in peer-reviewed journals, professional conferences and other knowledge transfer activities with primary healthcare providers, hospital care units, informal caregiver and patient associations.

### Author affiliations

<sup>1</sup>School of Health Sciences, HES-SO Valais-Wallis, Sion, Switzerland

<sup>2</sup>Institute of Biomedical Sciences Abel Salazar, University of Porto, Porto, Portugal

<sup>3</sup>Research Center for Psychology of Health, Aging and Sport Examination, University of Lausanne, Lausanne, Switzerland

<sup>4</sup>Service of Old Age Psychiatry, Lausanne University Hospital, Lausanne, Switzerland

<sup>5</sup>Swiss Centre of Expertise in the Social Sciences, University of Lausanne, FORS, Lausanne, Switzerland

<sup>6</sup>Higher School of Nursing of Porto, Porto, Portugal

**Twitter** Maria Manuela Martins @mmmartins1956

**Contributors** FP, PR and HV had the original idea. MSD, AVG, BW, MMM and HV provided conceptual and methodological expertise to the design of the research protocol. FP, PR and HV were major contributors to writing the manuscript. All authors read, edited and approved the final manuscript.

**Funding** This work is supported by the Swiss National Science Foundation grant number 407440\_183434/1.

**Competing interests** None declared.

**Patient consent for publication** Not required.

**Ethics approval** Ethical approval has been obtained from the Human Research Ethics Committee of the Canton Vaud (2018-02196).

**Provenance and peer review** Not commissioned; externally peer reviewed.

**Data availability statement** Data are available upon reasonable request.

**Open access** This is an open access article distributed in accordance with the Creative Commons Attribution Non Commercial (CC BY-NC 4.0) license, which permits others to distribute, remix, adapt, build upon this work non-commercially, and license their derivative works on different terms, provided the original work is

properly cited, appropriate credit is given, any changes made indicated, and the use is non-commercial. See: <http://creativecommons.org/licenses/by-nc/4.0/>.

### ORCID iD

Filipa Pereira <http://orcid.org/0000-0001-9207-4856>

## REFERENCES

- Bachmann N, Burla L, Kohler D, *et al*. La santé en Suisse-Le point sur les maladies chroniques: Rapport national sur la santé 2015. Retrieved from Berne: & Older people's experiences of medicine changes on leaving hospital. Research in Social and Administrative Pharmacy 2015;10:791-800.
- Marengoni A, Angleman S, Melis R, *et al*. Aging with multimorbidity: a systematic review of the literature. *Ageing Res Rev* 2011;10:430-9.
- Valderas JM, Starfield B, Sibbald B, *et al*. Defining comorbidity: implications for understanding health and health services. *Ann Fam Med* 2009;7:357-63.
- WHO. *Innovative care for chronic conditions: building blocks for action: global report*. Geneva: World Health Organization, 2002.
- Maher RL, Hanlon J, Hajjar ER. Clinical consequences of polypharmacy in elderly. *Expert Opin Drug Saf* 2014;13:57-65.
- Masnoon N, Shakib S, Kalisch-Ellett L, *et al*. What is polypharmacy? A systematic review of definitions. *BMC Geriatr* 2017;17:1-10.
- Monégat M, Rococo E. *Polypharmacy: definitions, measurement and stakes involved. Review of the literature and measurement tests*, 2014.
- Al Hamid A, Ghaleb M, Aljadhey H, *et al*. A systematic review of hospitalization resulting from medicine-related problems in adult patients. *Br J Clin Pharmacol* 2014;78:202-17.
- Renom-Guiteras A, Meyer G, Thürmann PA. The EU(7)-PIM list: a list of potentially inappropriate medications for older people consented by experts from seven European countries. *Eur J Clin Pharmacol* 2015;71:861-75.
- Nickel CH, Ruedinger JM, Messmer AS, *et al*. Drug - related emergency department visits by elderly patients presenting with non-specific complaints. *Scand J Trauma Resusc Emerg Med* 2013;21:15.
- Fallis BA, Dhalla IA, Klemensberg J, *et al*. Primary medication non-adherence after discharge from a general internal medicine service. *PLoS One* 2013;8:e61735.
- Bonnet-Zamponi D, d'Arailh L, Konrat C, *et al*. Drug-Related readmissions to medical units of older adults discharged from acute geriatric units: results of the optimization of medication in aged multicenter randomized controlled trial. *J Am Geriatr Soc* 2013;61:113-21.
- Gilbert A, Roughead L, McDermott R, *et al*. Multiple Chronic Health Conditions in Older People: Implications for Health Policy Planning, Practitioners and Patients. University of South Australia 2013 [Ageing well ageing productively: people living with multiple chronic health conditions [1-48]. Available: <https://www.unisa.edu.au/siteassets/epi-server-6-files/global/health/sansom/documents/qumprc/multiple-chronic-health-conditions.pdf>
- Roughead EE, Vitry AI, Caughey GE, *et al*. Multimorbidity, care complexity and prescribing for the elderly. *Ageing Health* 2011;7:695-705.
- O'Quin KE, Semalulu T, Orom H. Elder and caregiver solutions to improve medication adherence. *Health Educ Res* 2015;30:323-35.
- Gillespie R, Mullan J, Harrison L. Managing medications: the role of informal caregivers of older adults and people living with dementia. A review of the literature. *J Clin Nurs* 2014;23:3296-308.
- Look KA, Stone JA. Medication management activities performed by informal caregivers of older adults. *Res Social Adm Pharm* 2018;14:418-26.
- Reinhard SC, Levine C, Samis S. Home alone: family caregivers providing complex chronic care. *BMJ* 2012;41.
- Pellegrin KL, Lee E, Uyeno R, *et al*. Potentially preventable medication-related hospitalizations: a clinical pharmacist approach to assessment, categorization, and quality improvement. *J Am Pharm Assoc* 2017;57:711-6.
- Almanasreh E, Moles R, Chen TF. The medication reconciliation process and classification of discrepancies: a systematic review. *Br J Clin Pharmacol* 2016;82:645-58.
- IHI. *How-to guide: prevent adverse drug events by implementing medication reconciliation*. Cambridge, Massachusetts, USA: Institute for Healthcare Improvement, 2011.
- Barnsteiner JH, Reconciliation M. Medication reconciliation. In: Hughes RG, ed. *Patient safety and quality: an evidence-based Handbook for nurses*. Rockville (MD), 2008.



- 23 Creswell JW, Plano Clark VL. *Improving medication management in home care: issues and solutions*, 2011.
- 24 OECD. Health Status : Life expectancy, 2018. Available: <https://stats.oecd.org/index.aspx?queryid=30114> [Accessed 1 Aug 2019].
- 25 Vassar M, Holzmann M. The retrospective chart review: important methodological considerations. *J Educ Eval Health Prof* 2013;10:12.
- 26 Motheral B, Brooks J, Clark MA, et al. A checklist for retrospective database studies--report of the ISPOR Task Force on Retrospective Databases. *Value Health* 2003;6:90-7.
- 27 Holzer B. SwissDRG – L'essentiel en bref. *Bulletin des médecins suisses* 2012;93:1079-81.
- 28 OFS. *Classification Suisse des interventions Chirurgicales (CHOP)*. Office fédéral de la statistique, 2018.
- 29 Roux P, Pereira F, Santiago-Delefosse M, et al. Medication practices and experiences of older adults discharged home from Hospital: a feasibility study protocol. *Patient Prefer Adherence* 2018;12:1055-63.
- 30 Evans J, Jones P. The walking interview: methodology, mobility and place. *Applied Geography* 2011;31:849-58.
- 31 Monod S, Büla C, Hongler T, et al. Le Resident Assessment Instrument-Home-Care (RAI-Domicile) : ce que le médecin de premier recours doit savoir. *Revue Médicale Suisse* 2011;7:2176-83.
- 32 Guest G, Bunce A, Johnson L. How many interviews are enough? *Field methods* 2006;18:59-82.
- 33 Éd V. Commission consultative du soutien aux proches aidants. *État de Vaud* 2018.
- 34 Knight DA, Thompson D, Mathie E, et al. 'Seamless care? Just a list would have helped!' older people and their carer's experiences of support with medication on discharge home from hospital. *Health Expect* 2013;16:277-91.
- 35 Dew K, Chamberlain K, Hodgetts D, et al. Home as a hybrid centre of medication practice. *Social Health Illn* 2014;36:28-43.
- 36 Carpiano RM. Come take a walk with me: the "go-along" interview as a novel method for studying the implications of place for health and well-being. *Health Place* 2009;15:263-72.
- 37 Fainzang S. Les médicaments dans l'espace privé. *Anthropologie et Sociétés* 2003;27.
- 38 Haxaire C. « Calmer les nerfs » : automédication, observance et dépendance à l'égard des médicaments psychotropes. *Sciences sociales et santé* 2002;20:63-88.
- 39 Polak L, Green J. Using joint interviews to add analytic value. *Qual Health Res* 2016;26:1638-48.
- 40 Braun V, Clarke V. Using thematic analysis in psychology. *Qual Res Psychol* 2006;3:77-101.
- 41 Elo S, Kyngäs H. The qualitative content analysis process. *J Adv Nurs* 2008;62:107-15.
- 42 Ratinaud P, Déjean S. IRaMuTeQ: implémentation de la méthode ALCESTE d'analyse de texte dans un logiciel libre. *Modélisation Appliquée aux Sciences Humaines et Sociales* 2009:8-9.
- 43 ACI. *Understanding the process to develop a model of care: an ACI framework*. Chatswood: Agency for Clinical Innovation, 2013.
- 44 Bodenheimer T, Sinsky C. From triple to quadruple aim: care of the patient requires care of the provider. *Ann Fam Med* 2014;12:573-6.
- 45 Pereira F, Roux P, Rosselet Amoussou J, et al. Medication management models for Polymedicated home-dwelling older adults with multiple chronic conditions: protocol of a systematic review. *JMIR Res Protoc* 2019;8:e13582.

**The RECORD statement – checklist of items, extended from the STROBE statement, that should be reported in observational studies using routinely collected health data.**

|                           | Item No. | STROBE items                                                                                                                                                                               | Location in manuscript where items are reported | RECORD items                                                                                                                                                                                                                                                                                                                                                                                                                                       | Location in manuscript where items are reported                                                                        |
|---------------------------|----------|--------------------------------------------------------------------------------------------------------------------------------------------------------------------------------------------|-------------------------------------------------|----------------------------------------------------------------------------------------------------------------------------------------------------------------------------------------------------------------------------------------------------------------------------------------------------------------------------------------------------------------------------------------------------------------------------------------------------|------------------------------------------------------------------------------------------------------------------------|
| <b>Title and abstract</b> |          |                                                                                                                                                                                            |                                                 |                                                                                                                                                                                                                                                                                                                                                                                                                                                    |                                                                                                                        |
|                           | 1        | (a) Indicate the study's design with a commonly used term in the title or the abstract (b) Provide in the abstract an informative and balanced summary of what was done and what was found |                                                 | <p>RECORD 1.1: The type of data used should be specified in the title or abstract. When possible, the name of the databases used should be included.</p> <p>RECORD 1.2: If applicable, the geographic region and timeframe within which the study took place should be reported in the title or abstract.</p> <p>RECORD 1.3: If linkage between databases was conducted for the study, this should be clearly stated in the title or abstract.</p> | <p>Title Abstract (lines 2-8)</p> <p>Line 6</p> <p>Lines 118-121</p> <p>Not applicable, only one hospital register</p> |
| <b>Introduction</b>       |          |                                                                                                                                                                                            |                                                 |                                                                                                                                                                                                                                                                                                                                                                                                                                                    |                                                                                                                        |
| Background rationale      | 2        | Explain the scientific background and rationale for the investigation being reported                                                                                                       |                                                 |                                                                                                                                                                                                                                                                                                                                                                                                                                                    | Lines 39-101                                                                                                           |
| Objectives                | 3        | State specific objectives, including any prespecified hypotheses                                                                                                                           |                                                 |                                                                                                                                                                                                                                                                                                                                                                                                                                                    | Lines 101-107                                                                                                          |
| <b>Methods</b>            |          |                                                                                                                                                                                            |                                                 |                                                                                                                                                                                                                                                                                                                                                                                                                                                    |                                                                                                                        |
| Study Design              | 4        | Present key elements of study design early in the paper                                                                                                                                    |                                                 |                                                                                                                                                                                                                                                                                                                                                                                                                                                    | Lines 110-114                                                                                                          |
| Setting                   | 5        | Describe the setting, locations, and relevant dates, including periods of recruitment, exposure, follow-up, and data collection                                                            |                                                 |                                                                                                                                                                                                                                                                                                                                                                                                                                                    | Lines 117-133                                                                                                          |

|                              |   |                                                                                                                                                                                                                                                                                                                                                                                                                                                                                                                                                                                                                                                                                                                              |  |                                                                                                                                                                                                                                                                                                                                                                                                                                                                                                                                                                                                                                                                                                      |                                                                                                                                                                                                                                                                                                          |
|------------------------------|---|------------------------------------------------------------------------------------------------------------------------------------------------------------------------------------------------------------------------------------------------------------------------------------------------------------------------------------------------------------------------------------------------------------------------------------------------------------------------------------------------------------------------------------------------------------------------------------------------------------------------------------------------------------------------------------------------------------------------------|--|------------------------------------------------------------------------------------------------------------------------------------------------------------------------------------------------------------------------------------------------------------------------------------------------------------------------------------------------------------------------------------------------------------------------------------------------------------------------------------------------------------------------------------------------------------------------------------------------------------------------------------------------------------------------------------------------------|----------------------------------------------------------------------------------------------------------------------------------------------------------------------------------------------------------------------------------------------------------------------------------------------------------|
| Participants                 | 6 | <p>(a) <i>Cohort study</i> - Give the eligibility criteria, and the sources and methods of selection of participants. Describe methods of follow-up</p> <p><i>Case-control study</i> - Give the eligibility criteria, and the sources and methods of case ascertainment and control selection. Give the rationale for the choice of cases and controls</p> <p><i>Cross-sectional study</i> - Give the eligibility criteria, and the sources and methods of selection of participants</p> <p>(b) <i>Cohort study</i> - For matched studies, give matching criteria and number of exposed and unexposed</p> <p><i>Case-control study</i> - For matched studies, give matching criteria and the number of controls per case</p> |  | <p>RECORD 6.1: The methods of study population selection (such as codes or algorithms used to identify subjects) should be listed in detail. If this is not possible, an explanation should be provided.</p> <p>RECORD 6.2: Any validation studies of the codes or algorithms used to select the population should be referenced. If validation was conducted for this study and not published elsewhere, detailed methods and results should be provided.</p> <p>RECORD 6.3: If the study involved linkage of databases, consider use of a flow diagram or other graphical display to demonstrate the data linkage process, including the number of individuals with linked data at each stage.</p> | <p>in press/<br/>forthcoming<br/>JMIR article:<br/><a href="https://www.ncbi.nlm.nih.gov/pubmed/management/validator/909A44E74F70/citations/?start=0">https://www.ncbi.nlm.nih.gov/pubmed/management/validator/909A44E74F70/citations/?start=0</a></p> <p>Not applicable, only one hospital register</p> |
| Variables                    | 7 | Clearly define all outcomes, exposures, predictors, potential confounders, and effect modifiers. Give diagnostic criteria, if applicable.                                                                                                                                                                                                                                                                                                                                                                                                                                                                                                                                                                                    |  | RECORD 7.1: A complete list of codes and algorithms used to classify exposures, outcomes, confounders, and effect modifiers should be provided. If these cannot be reported, an explanation should be provided.                                                                                                                                                                                                                                                                                                                                                                                                                                                                                      | Lines 152-177 and<br>in press/<br>forthcoming<br>JMIR article:<br><a href="https://www.ncbi.nlm.nih.gov/pubmed/management/validator/909A44E74F70/citations/?start=0">https://www.ncbi.nlm.nih.gov/pubmed/management/validator/909A44E74F70/citations/?start=0</a>                                        |
| Data sources/<br>measurement | 8 | For each variable of interest, give sources of data and details                                                                                                                                                                                                                                                                                                                                                                                                                                                                                                                                                                                                                                                              |  |                                                                                                                                                                                                                                                                                                                                                                                                                                                                                                                                                                                                                                                                                                      | Lines 122-128 and                                                                                                                                                                                                                                                                                        |

|                        |    |                                                                                                                               |  |  |                                                                                                                                                                                                                                                       |
|------------------------|----|-------------------------------------------------------------------------------------------------------------------------------|--|--|-------------------------------------------------------------------------------------------------------------------------------------------------------------------------------------------------------------------------------------------------------|
|                        |    | of methods of assessment (measurement). Describe comparability of assessment methods if there is more than one group          |  |  | in press/ forthcoming JMIR article: <a href="https://www.ncbi.nlm.nih.gov/pubmed/management/validator/909A44E74F70/citations/?start=0">https://www.ncbi.nlm.nih.gov/pubmed/management/validator/909A44E74F70/citations/?start=0</a>                   |
| Bias                   | 9  | Describe any efforts to address potential sources of bias                                                                     |  |  | Lines 180-200 and in press/ forthcoming JMIR article: <a href="https://www.ncbi.nlm.nih.gov/pubmed/management/validator/909A44E74F70/citations/?start=0">https://www.ncbi.nlm.nih.gov/pubmed/management/validator/909A44E74F70/citations/?start=0</a> |
| Study size             | 10 | Explain how the study size was arrived at                                                                                     |  |  | Lines 141-144                                                                                                                                                                                                                                         |
| Quantitative variables | 11 | Explain how quantitative variables were handled in the analyses. If applicable, describe which groupings were chosen, and why |  |  | Lines 139-150 and in press/ forthcoming JMIR article: <a href="https://www.ncbi.nlm.nih.gov/pubmed/management/validator/909A44E74F70/citations/?start=0">https://www.ncbi.nlm.nih.gov/pubmed/management/validator/909A44E74F70/citations/?start=0</a> |

1  
2  
3  
4  
5  
6  
7  
8  
9  
10  
11  
12  
13  
14  
15  
16  
17  
18  
19  
20  
21  
22  
23  
24  
25  
26  
27  
28  
29  
30  
31  
32  
33  
34  
35  
36  
37  
38  
39  
40  
41  
42  
43  
44  
45  
46  
47

|                                  |    |                                                                                                                                                                                                                                                                                                                                                                                                                                                                                                                                                                                                     |  |                                                                                                                                                                                                                                                                     |                                                                                                                                                                                                                                                             |
|----------------------------------|----|-----------------------------------------------------------------------------------------------------------------------------------------------------------------------------------------------------------------------------------------------------------------------------------------------------------------------------------------------------------------------------------------------------------------------------------------------------------------------------------------------------------------------------------------------------------------------------------------------------|--|---------------------------------------------------------------------------------------------------------------------------------------------------------------------------------------------------------------------------------------------------------------------|-------------------------------------------------------------------------------------------------------------------------------------------------------------------------------------------------------------------------------------------------------------|
| Statistical methods              | 12 | <p>(a) Describe all statistical methods, including those used to control for confounding</p> <p>(b) Describe any methods used to examine subgroups and interactions</p> <p>(c) Explain how missing data were addressed</p> <p>(d) <i>Cohort study</i> - If applicable, explain how loss to follow-up was addressed</p> <p><i>Case-control study</i> - If applicable, explain how matching of cases and controls was addressed</p> <p><i>Cross-sectional study</i> - If applicable, describe analytical methods taking account of sampling strategy</p> <p>(e) Describe any sensitivity analyses</p> |  |                                                                                                                                                                                                                                                                     | Lines 180-200                                                                                                                                                                                                                                               |
| Data access and cleaning methods | .. | ..                                                                                                                                                                                                                                                                                                                                                                                                                                                                                                                                                                                                  |  | <p>RECORD 12.1: Authors should describe the extent to which the investigators had access to the database population used to create the study population.</p> <p>RECORD 12.2: Authors should provide information on the data cleaning methods used in the study.</p> | <p>Lines 118-122 and in press/forthcoming JMIR article: <a href="https://www.ncbi.nlm.nih.gov/pubmed/management/validator/909A44E74F70/citations/?start=0">https://www.ncbi.nlm.nih.gov/pubmed/management/validator/909A44E74F70/citations/?start=0</a></p> |
| Linkage                          | .. | ..                                                                                                                                                                                                                                                                                                                                                                                                                                                                                                                                                                                                  |  | <p>RECORD 12.3: State whether the study included person-level, institutional-level, or other data linkage across two or more databases. The methods of linkage and methods of</p>                                                                                   | <p>in press/forthcoming JMIR article: <a href="https://www.ncbi.nlm.nih.gov/pubmed/">https://www.ncbi.nlm.nih.gov/pubmed/</a></p>                                                                                                                           |



|                  |    |                                                                                                                                                                                                                                                                                                                                                 |  |                                                                                                                                                                                                                                                                                                                    |                                                                                                                                                            |
|------------------|----|-------------------------------------------------------------------------------------------------------------------------------------------------------------------------------------------------------------------------------------------------------------------------------------------------------------------------------------------------|--|--------------------------------------------------------------------------------------------------------------------------------------------------------------------------------------------------------------------------------------------------------------------------------------------------------------------|------------------------------------------------------------------------------------------------------------------------------------------------------------|
|                  |    |                                                                                                                                                                                                                                                                                                                                                 |  | linkage quality evaluation should be provided.                                                                                                                                                                                                                                                                     | <a href="https://pubmed.ncbi.nlm.nih.gov/management/validator/909A44E74F70/citations/?start=0">ed/management/validator/909A44E74F70/citations/?start=0</a> |
| <b>Results</b>   |    |                                                                                                                                                                                                                                                                                                                                                 |  |                                                                                                                                                                                                                                                                                                                    |                                                                                                                                                            |
| Participants     | 13 | (a) Report the numbers of individuals at each stage of the study ( <i>e.g.</i> , numbers potentially eligible, examined for eligibility, confirmed eligible, included in the study, completing follow-up, and analysed)<br>(b) Give reasons for non-participation at each stage.<br>(c) Consider use of a flow diagram                          |  | RECORD 13.1: Describe in detail the selection of the persons included in the study ( <i>i.e.</i> , study population selection) including filtering based on data quality, data availability and linkage. The selection of included persons can be described in the text and/or by means of the study flow diagram. | Lines 142-143                                                                                                                                              |
| Descriptive data | 14 | (a) Give characteristics of study participants ( <i>e.g.</i> , demographic, clinical, social) and information on exposures and potential confounders<br>(b) Indicate the number of participants with missing data for each variable of interest<br>(c) <i>Cohort study</i> - summarise follow-up time ( <i>e.g.</i> , average and total amount) |  |                                                                                                                                                                                                                                                                                                                    | Lines 152-177                                                                                                                                              |
| Outcome data     | 15 | <i>Cohort study</i> - Report numbers of outcome events or summary measures over time<br><i>Case-control study</i> - Report numbers in each exposure category, or summary measures of exposure<br><i>Cross-sectional study</i> - Report numbers of outcome events or summary measures                                                            |  |                                                                                                                                                                                                                                                                                                                    | Lines 142-144                                                                                                                                              |

|                                                                               |                   |    |                                                                                                                                                                                                                                                                                                                                                                                                                 |  |                                                                                                                                                                                                                                                                                                          |               |
|-------------------------------------------------------------------------------|-------------------|----|-----------------------------------------------------------------------------------------------------------------------------------------------------------------------------------------------------------------------------------------------------------------------------------------------------------------------------------------------------------------------------------------------------------------|--|----------------------------------------------------------------------------------------------------------------------------------------------------------------------------------------------------------------------------------------------------------------------------------------------------------|---------------|
| 1<br>2<br>3<br>4<br>5<br>6<br>7<br>8<br>9<br>10<br>11<br>12<br>13<br>14<br>15 | Main results      | 16 | (a) Give unadjusted estimates and, if applicable, confounder-adjusted estimates and their precision (e.g., 95% confidence interval). Make clear which confounders were adjusted for and why they were included<br>(b) Report category boundaries when continuous variables were categorized<br>(c) If relevant, consider translating estimates of relative risk into absolute risk for a meaningful time period |  |                                                                                                                                                                                                                                                                                                          | Lines 207-285 |
| 16<br>17<br>18<br>19<br>20                                                    | Other analyses    | 17 | Report other analyses done—e.g., analyses of subgroups and interactions, and sensitivity analyses                                                                                                                                                                                                                                                                                                               |  |                                                                                                                                                                                                                                                                                                          | Lines 207-285 |
| 21                                                                            | <b>Discussion</b> |    |                                                                                                                                                                                                                                                                                                                                                                                                                 |  |                                                                                                                                                                                                                                                                                                          |               |
| 22<br>23<br>24                                                                | Key results       | 18 | Summarise key results with reference to study objectives                                                                                                                                                                                                                                                                                                                                                        |  |                                                                                                                                                                                                                                                                                                          | Lines 289-294 |
| 25<br>26<br>27<br>28<br>29<br>30<br>31<br>32<br>33<br>34                      | Limitations       | 19 | Discuss limitations of the study, taking into account sources of potential bias or imprecision. Discuss both direction and magnitude of any potential bias                                                                                                                                                                                                                                                      |  | RECORD 19.1: Discuss the implications of using data that were not created or collected to answer the specific research question(s). Include discussion of misclassification bias, unmeasured confounding, missing data, and changing eligibility over time, as they pertain to the study being reported. | Lines 369-378 |
| 35<br>36<br>37<br>38<br>39<br>40<br>41<br>42                                  | Interpretation    | 20 | Give a cautious overall interpretation of results considering objectives, limitations, multiplicity of analyses, results from similar studies, and other relevant evidence                                                                                                                                                                                                                                      |  |                                                                                                                                                                                                                                                                                                          | Lines 294-361 |



|                                                                      |                                                           |    |                                                                                                                                                               |                                                                                                                                                          |                                                                                                                                                                                                                                              |
|----------------------------------------------------------------------|-----------------------------------------------------------|----|---------------------------------------------------------------------------------------------------------------------------------------------------------------|----------------------------------------------------------------------------------------------------------------------------------------------------------|----------------------------------------------------------------------------------------------------------------------------------------------------------------------------------------------------------------------------------------------|
| 1<br>2<br>3                                                          | Generalisability                                          | 21 | Discuss the generalisability (external validity) of the study results                                                                                         |                                                                                                                                                          | Lines 349-355                                                                                                                                                                                                                                |
| 4                                                                    | <b>Other Information</b>                                  |    |                                                                                                                                                               |                                                                                                                                                          |                                                                                                                                                                                                                                              |
| 5<br>6<br>7<br>8<br>9                                                | Funding                                                   | 22 | Give the source of funding and the role of the funders for the present study and, if applicable, for the original study on which the present article is based |                                                                                                                                                          | Line 399                                                                                                                                                                                                                                     |
| 10<br>11<br>12<br>13<br>14<br>15<br>16<br>17<br>18<br>19<br>20<br>21 | Accessibility of protocol, raw data, and programming code |    | ..                                                                                                                                                            | RECORD 22.1: Authors should provide information on how to access any supplemental information such as the study protocol, raw data, or programming code. | in press/<br>forthcoming<br>JMIR article:<br><a href="https://www.ncbi.nlm.nih.gov/pubmed/management/validator/909A44E74F70/citations/?start=0">https://www.ncbi.nlm.nih.gov/pubmed/management/validator/909A44E74F70/citations/?start=0</a> |

\*Reference: Benchimol EI, Smeeth L, Guttman A, Harron K, Moher D, Petersen I, Sørensen HT, von Elm E, Langan SM, the RECORD Working Committee. The REporting of studies Conducted using Observational Routinely-collected health Data (RECORD) Statement. *PLoS Medicine* 2015; in press.

\*Checklist is protected under Creative Commons Attribution ([CC BY](https://creativecommons.org/licenses/by/4.0/)) license.

# BMJ Open

## Risks of 30-day hospital readmission associated with medical conditions and drug regimens of polymedicated, older inpatients discharged home: a registry-based cohort study

|                                 |                                                                                                                                                                                                                                                                                                                                                                                                                                                                                                                                                                                                                                                                                                                                                                                                                                                                                                                                                               |
|---------------------------------|---------------------------------------------------------------------------------------------------------------------------------------------------------------------------------------------------------------------------------------------------------------------------------------------------------------------------------------------------------------------------------------------------------------------------------------------------------------------------------------------------------------------------------------------------------------------------------------------------------------------------------------------------------------------------------------------------------------------------------------------------------------------------------------------------------------------------------------------------------------------------------------------------------------------------------------------------------------|
| Journal:                        | <i>BMJ Open</i>                                                                                                                                                                                                                                                                                                                                                                                                                                                                                                                                                                                                                                                                                                                                                                                                                                                                                                                                               |
| Manuscript ID                   | bmjopen-2021-052755.R1                                                                                                                                                                                                                                                                                                                                                                                                                                                                                                                                                                                                                                                                                                                                                                                                                                                                                                                                        |
| Article Type:                   | Original research                                                                                                                                                                                                                                                                                                                                                                                                                                                                                                                                                                                                                                                                                                                                                                                                                                                                                                                                             |
| Date Submitted by the Author:   | 19-Jun-2021                                                                                                                                                                                                                                                                                                                                                                                                                                                                                                                                                                                                                                                                                                                                                                                                                                                                                                                                                   |
| Complete List of Authors:       | Pereira, Filipa; University of Porto, Institute of Biomedical Sciences Abel Salazar; HES-SO University of Applied Sciences and Arts Western Switzerland, School of Health Sciences<br>Verloo, Henk; HES-SO University of Applied Sciences and Arts Western Switzerland, School of Health Sciences; Lausanne University Hospital, Service of Old Age Psychiatry<br>Zhivko, Taushanov; University of Geneva<br>Di Giovanni, Saviana; HES-SO University of Applied Sciences and Arts Western Switzerland, School of Health Sciences; Pharmacy Benu Tavil-Chatton<br>Meyer-Masseti, Carla; University of Bern, Institute for Primary Health Care<br>Von-Gunten, Armin; Lausanne University Hospital, Service of Old Age Psychiatry<br>Martins, Maria Manuela; Porto Higher School of Nursing; University of Porto, Institute of Biomedical Sciences Abel Salazar<br>Wernli, Boris; University of Lausanne, FORS, Swiss Centre of Expertise in the Social Sciences |
| <b>Primary Subject Heading</b>: | Geriatric medicine                                                                                                                                                                                                                                                                                                                                                                                                                                                                                                                                                                                                                                                                                                                                                                                                                                                                                                                                            |
| Secondary Subject Heading:      | Epidemiology, Health informatics                                                                                                                                                                                                                                                                                                                                                                                                                                                                                                                                                                                                                                                                                                                                                                                                                                                                                                                              |
| Keywords:                       | GERIATRIC MEDICINE, CLINICAL PHARMACOLOGY, EPIDEMIOLOGY                                                                                                                                                                                                                                                                                                                                                                                                                                                                                                                                                                                                                                                                                                                                                                                                                                                                                                       |
|                                 |                                                                                                                                                                                                                                                                                                                                                                                                                                                                                                                                                                                                                                                                                                                                                                                                                                                                                                                                                               |

SCHOLARONE™  
Manuscripts



I, the Submitting Author has the right to grant and does grant on behalf of all authors of the Work (as defined in the below author licence), an exclusive licence and/or a non-exclusive licence for contributions from authors who are: i) UK Crown employees; ii) where BMJ has agreed a CC-BY licence shall apply, and/or iii) in accordance with the terms applicable for US Federal Government officers or employees acting as part of their official duties; on a worldwide, perpetual, irrevocable, royalty-free basis to BMJ Publishing Group Ltd ("BMJ") its licensees and where the relevant Journal is co-owned by BMJ to the co-owners of the Journal, to publish the Work in this journal and any other BMJ products and to exploit all rights, as set out in our [licence](#).

The Submitting Author accepts and understands that any supply made under these terms is made by BMJ to the Submitting Author unless you are acting as an employee on behalf of your employer or a postgraduate student of an affiliated institution which is paying any applicable article publishing charge ("APC") for Open Access articles. Where the Submitting Author wishes to make the Work available on an Open Access basis (and intends to pay the relevant APC), the terms of reuse of such Open Access shall be governed by a Creative Commons licence – details of these licences and which [Creative Commons](#) licence will apply to this Work are set out in our licence referred to above.

Other than as permitted in any relevant BMJ Author's Self Archiving Policies, I confirm this Work has not been accepted for publication elsewhere, is not being considered for publication elsewhere and does not duplicate material already published. I confirm all authors consent to publication of this Work and authorise the granting of this licence.

1  
2  
3  
4  
5 **Risks of 30-day hospital readmission associated with medical**  
6 **conditions and drug regimens of polymedicated, older inpatients**  
7 **discharged home: a registry-based cohort study**  
8  
9  
10  
11

12  
13 **Pereira Filipa<sup>1</sup>, Verloo Henk<sup>2</sup>, Taushanov Zhivko<sup>3</sup>, Di Giovanni Saviana<sup>4</sup>, Meyer-Massetti**  
14 **Carla<sup>5</sup>, von Gunten Armin<sup>6</sup>, Martins Maria Manuela<sup>7</sup>, Wernli Boris<sup>8</sup>**  
15

16  
17 <sup>1</sup>Institute of Biomedical Sciences Abel Salazar, University of Porto

18 Rua de Jorge Viterbo Ferreira, 228 4050-313 Porto, Portugal

19 School of Health Sciences, HES-SO University of Applied Sciences and Arts Western Switzerland

20 5, Chemin de l'Agasse, CH-1950 Sion, Switzerland

21 Email: [filipa.pereira@hevs.ch](mailto:filipa.pereira@hevs.ch); Phone: +41 78 666 17 00; Fax: +41 27 606 84 00

22 ORCID: <https://orcid.org/0000-0001-9207-4856>  
23  
24  
25

26  
27 <sup>2</sup>School of Health Sciences, HES-SO University of Applied Sciences and Arts Western Switzerland

28 5, Chemin de l'Agasse, CH-1950 Sion, Switzerland

29 Service of Old Age Psychiatry, Lausanne University Hospital

30 Email: [henk.verloo@hevs.ch](mailto:henk.verloo@hevs.ch); Phone: +41 27 606 84 34

31 ORCID: <http://orcid.org/0000-0002-5375-3255>  
32  
33  
34

35  
36 <sup>3</sup>University of Geneva

37 CH-1205 Geneva, Switzerland

38 Email: [zhivko.taushanov@unige.ch](mailto:zhivko.taushanov@unige.ch)

39 ORCID: <https://orcid.org/0000-0002-3798-757X>  
40  
41  
42

43 <sup>4</sup>School of Health Sciences, HES-SO University of Applied Sciences and Arts Western Switzerland

44 5, Chemin de l'Agasse, CH-1950 Sion, Switzerland

45 Pharmacy Benu Tavail-Chatton

46 Grand rue 11, CH-1110 Morges, Switzerland

47 Email: [saviana.digiovanni@gmail.com](mailto:saviana.digiovanni@gmail.com)  
48  
49  
50

51 <sup>5</sup>Institute for Primary Health Care, University of Bern

52 Mittelstrasse 43, CH-3012 Bern, Switzerland

53 Email: [carla.meyer-massetti@biham.unibe.ch](mailto:carla.meyer-massetti@biham.unibe.ch)

54 ORCID: <https://orcid.org/0000-0002-3523-5729>  
55  
56  
57

58  
59 <sup>6</sup>Service of Old Age Psychiatry,  
60

1  
2  
3 Lausanne University Hospital  
4 Route de Cery 60, 1008 Prilly, Switzerland  
5  
6 Email: [armin.von-gunten@chuv.ch](mailto:armin.von-gunten@chuv.ch); Phone: +41 21 314 52 67  
7  
8 ORCID: <https://orcid.org/0000-0001-7852-3803>  
9

10  
11 <sup>7</sup> Higher School of Nursing of Porto  
12 Institute of Biomedical Sciences Abel Salazar, University of Porto  
13 Rua Dr. António Bernardino de Almeida  
14 4200-072 Porto, Portugal  
15  
16 Email: [mmartins@esenf.pt](mailto:mmartins@esenf.pt); Phone: +351 22 507 35 00  
17  
18 ORCID: <https://orcid.org/0000-0003-1527-9940>  
19

20  
21 <sup>8</sup> FORS, Swiss Centre of Expertise in the Social Sciences, University of Lausanne  
22 Géopolis, CH-1015 Lausanne, Switzerland  
23  
24 Email: [boris.wernli@fors.unil.ch](mailto:boris.wernli@fors.unil.ch); Phone: +41 21 692 37 23  
25  
26 ORCID: <https://orcid.org/0000-0002-5567-1317>  
27

28 **Corresponding author:**

29 Pereira F  
30 Institute of Biomedical Sciences Abel Salazar, University of Porto  
31 Rua de Jorge Viterbo Ferreira, 228 4050-313 Porto, Portugal  
32  
33 School of Health Sciences, HES-SO University of Applied Sciences and Arts Western Switzerland  
34 5, Chemin de l'Agasse, CH-1950 Sion, Switzerland  
35  
36 Email: [filipa.pereira@hevs.ch](mailto:filipa.pereira@hevs.ch); Phone: +41 78 666 17 00; Fax: +41 27 606 84 00  
37  
38 ORCID: <https://orcid.org/0000-0001-9207-4856>  
39  
40  
41  
42  
43  
44  
45  
46  
47  
48  
49  
50  
51  
52  
53  
54  
55  
56  
57  
58  
59  
60



## Abstract

**Objectives:** The present study analysed four years of a hospital register (2015–2018) to determine the risks of 30-day hospital readmission associated with the medical conditions and drug regimens of polymedicated, older inpatients discharged home.

**Design:** Registry-based cohort study.

**Setting:** Valais Hospital—a public general hospital centre in the French-speaking part of Switzerland.

**Participants:** We explored the electronic records of 20,422 inpatient stays by polymedicated, home-dwelling older adults held in the hospital's patient register. We identified 13,802 hospital readmissions involving 8,878 separate patients over 64 years old.

**Outcome measures:** Sociodemographic characteristics, medical conditions and drug regimen data associated with the risk of readmission within 30 days of discharge.

**Results:** The overall 30-day hospital readmission rate was 7.8%. Adjusted multivariate analyses revealed increased risks of hospital readmission for patients with longer hospital lengths of stay (OR = 1.014 per additional day; 95% CI: 1.006–1.021), impaired mobility (OR = 1.218 ; 95% CI: 1.039–1.427), multimorbidity (OR = 1.419 per additional ICD-10 condition; 95% CI: 1.282–1.572), tumoural disease (OR = 2.538; 95% CI: 2.089–3.082), polypharmacy (OR = 1.043 per additional drug prescribed; 95% CI: 1.028–1.058), and certain specific drugs, including antiemetics and antinauseants (OR = 3.216 per additional drug unit taken; 95% CI: 1.842–5.617), antihypertensives (OR = 1.771; 95% CI: 1.287–2.438), drugs for functional gastrointestinal disorders (OR = 1.424; 95% CI: 1.166–1.739), systemic hormonal preparations (OR = 1.207; 95% CI: 1.052–1.385), and vitamins (OR = 1.201; 95% CI: 1.049–1.374), as well as the concurrent use of beta-blocking agents and drugs for acid-related disorders (OR = 1.367; 95% CI: 1.046–1.788). **Conclusions:** Thirty-day hospital readmission risks were associated with longer hospital length of stay, health disorders, polypharmacy and drug regimens. The drug regimen patterns increasing the risk of hospital readmission were very heterogeneous. Further research is needed to explore hospital readmissions caused solely by specific drugs and drug–drug interactions.

**Keywords:** polypharmacy; odds ratio; logistic regression; hospital register; ATC Classification System; adverse-drug events; hospital readmission.

### Strengths and limitations of this study:

- The records of 20,422 hospitalisations involving 8,878 different polymedicated home-dwelling older patients readmitted to hospital at least once were studied to determine the risks of 30-day hospital readmission.
- The study included four years' data from a comprehensive hospital register (2015–2018).
- A whole series of sociodemographic and clinical parameters, medical conditions and prescribed drugs were used to predict the probability of hospital readmission.
- Analyses were correlational and causality was not explored.

- 1  
2  
3  
4 38       • Although the study considered statistical associations between drugs and hospital readmissions,  
5 39           it did not consider clinically diagnosed drug–drug interactions.  
6  
7 40  
8  
9 41

## 10 42 **Introduction**

11 43 Longitudinal studies have demonstrated that approximately 20% of the home-dwelling older adults  
12 44 supported by home health-care services experienced hospital readmission within 30 days of their  
13 45 discharge (1-3). For many older adults, readmission to an acute hospital is associated with a functional  
14 46 decline that has not always recovered by the time they are discharged (4). However, the systematic review  
15 47 by Hansen *et al.* revealed wide-ranging estimates (5%–79%) of how many hospital readmissions were  
16 48 preventable (5). The period between hospital discharge and readmission has not always been clearly  
17 49 stated in the literature, ranging from 30 days to 3 years. However, 30 days is the most frequently used in  
18 50 public health policy when measuring health-care system performance (6-8).  
19 51

20 52 Numerous determinants have been identified and associated with hospital readmissions, e.g.  
21 53 sociodemographic and individual characteristics, multimorbidity and medical events (9, 10). A substantial  
22 54 risk of 30-day hospital readmission has been associated with older inpatients treated for different diseases  
23 55 and surgical interventions involving hip fracture, cancer, bypass, acute cardiovascular events or complex  
24 56 surgery (11). The reasons for hospital readmission after a surgical intervention are often not directly  
25 57 related to the surgery itself but rather to underlying chronic health conditions (12). Thus, chronic diseases  
26 58 may play an important role in readmission risk, independently of the reason for the initial hospitalisation  
27 59 (13, 14). Older adults' chronic diseases are not isolated health conditions; they can influence each other,  
28 60 and treatment for one disease may adversely affect another (15). For all these reasons, patterns of 30-day  
29 61 hospital readmissions may be very complex (16).  
30 62

31 63 Multimorbidity, in the case of two or more diseases (17, 18), may require taking multiple medicines (19),  
32 64 known as polypharmacy (PP) when daily intake involves five or more drugs (20). Increasing incidences  
33 65 of multimorbidity with age, and consequently PP, add to the complexity of managing older inpatients'  
34 66 drug prescriptions, particularly at hospital discharge (21, 22). PP and inadequate drug management are  
35 67 significant risk factors for adverse drug events (ADEs)—the most common post-discharge  
36 68 complications—alongside hospital-acquired infections and procedural complications (23, 24). ADEs  
37 69 resulting from inappropriate drug prescribing, discrepancies between prescribed and current regimens,  
38 70 poor adherence and the inadequate surveillance of adverse effects frequently lead to hospital admissions,  
39 71 readmissions (8) and other undesirable consequences such as increased morbidity, decreased autonomy,  
40 72 institutionalisation and even early death (25, 26). A systematic review by Morabet *et al.* indicated ADE  
41 73 rates of 18%–38% after hospital discharge and 4.5%–24% hospital readmission rates due to those ADEs  
42 74 (27). Because older adults use more drugs, they are at a greater risk of drug-related readmission.  
43 75 Numerous studies have found that nearly 30% of older inpatients experienced ADEs within three weeks  
44 76 of hospital discharge, almost three-quarters of which could have been prevented or lessened (10, 28, 29).  
45  
46  
47  
48  
49  
50  
51  
52  
53  
54  
55  
56  
57  
58  
59  
60

77

78 Despite the significant overall impact of ADEs on hospital readmission rates, little is known about  
79 hospital readmission risk's associations with medical conditions and drug regimens (30, 31). Morabet *et*  
80 *al.* revealed the high prevalence of antibiotics, diuretics, vitamin K antagonists, opioids, antidiabetics,  
81 anti-cancer drugs, antihypertensives, digitalis glycosides, corticosteroids and psychotropic drugs in drug-  
82 related hospital readmissions (27). Samoy *et al.* reported that anticoagulants, hypoglycaemics, beta-  
83 blocking agents, antidepressants, calcium channel blockers and lenograstim were associated with high  
84 risks of hospital readmission (32). A retrospective patient record study by Teymoorian *et al.* reported that  
85 anticoagulants and antiplatelet agents, diuretics and antihypertensives, and opioids were associated with a  
86 high risk of persons aged 80 years old or more being readmitted to hospital within 30 days (33). Blanc *et*  
87 *al.* reported the readmission scores of different drugs in a large sample of 10,374 adult hospital  
88 admissions in general medicine. Taking beta-blocking agents, calcium channel blockers, diuretics,  
89 hypoglycaemic drugs or opioids was a significant risk for 30-day readmission (9).

90

91 Besides higher risks of drug-related hospital readmission, some studies have also investigated  
92 associations between combining drugs—a common practice when treating complex diseases or co-  
93 existing medical conditions—and drug-related hospital readmissions. Although using multiple drugs may  
94 be good clinical practice and compliant with guidelines for treating certain diseases, one significant  
95 consequence of combining drugs is that patients face much higher risks of ADEs, which can be caused by  
96 drug–drug interactions (34–36). ADEs can emerge because a drug's pharmacokinetics and  
97 pharmacodynamics change if taken with another drug (36). Moura *et al.* found that participants with  
98 potential drug–drug interactions on their prescription list had a 2.4 times higher adjusted odds ratio (OR)  
99 of being readmitted (37).

100

101 Even though some studies have reported high numbers of readmissions among home-dwelling older  
102 patients for a variety of drugs (38), this health issue was mostly investigated using prospective or cross-  
103 sectional studies with small samples. More insight is needed into patterns of drug-related hospital  
104 readmissions and risk factors in order to design better interventions for addressing ADEs (39, 40). As part  
105 of a broader project (41), the present study's goal was to use hospital register data to prioritise risk factors  
106 for hospital readmission. We hypothesised that sociodemographic characteristics, medical conditions  
107 (defined using the WHO's International Classification of Diseases, tenth revision: ICD-10, and the Swiss  
108 Classification of Surgical Interventions: CHOP), and drug prescriptions (based on the WHO's Anatomical  
109 Therapeutic Chemical (ATC) Classification System) were significant risk factors for 30-day hospital  
110 readmission for discharged older adults.

## 111 **Material and Methods**

### 112 **Study Design**

113 This longitudinal study (2015–2018) used data on a population cohort taken from a hospital registry  
114 composed of 140 variables. These were used to investigate the associations between the risks of 30-day  
115 hospital readmission and the medical conditions and drug regimens of polymedicated older inpatients

1  
2  
3  
4 116 discharged home. The study was performed with close regard to the REporting of studies Conducted  
5 117 using Observational Routinely collected health Data (RECORD) statement (42).

### 118 **Population and Data Collection**

8 119 Our custom, four-year, registry-based dataset included polymedicated inpatients (five or more drugs  
9 120 prescribed at hospital discharge), aged 65 years old or more, living in their own homes and hospitalised at  
10 121 least once at the Valais Hospital (a public general hospital in the French-speaking part of Switzerland).  
11 122 This specific population was selected because of its increased risk of hospital readmission (10, 28, 29).  
12 123 Older inpatients hospitalised once only or who died during hospitalisation were excluded, as were those  
13 124 hospitalised for fewer than 24 hours (the criterion to count as “hospitalised” in Switzerland). Valais  
14 125 Hospital’s register contains a comprehensive electronic health record composed of 140 variables routinely  
15 126 collected during hospital stays. However, no electronic patient records were available for adult psychiatry  
16 127 for 2015–2018. The extracted patient data contained sociodemographic characteristics, medical and  
17 128 surgical diagnoses, routinely assessed clinical data (such as gait, falls risk or hearing) from hospitalised  
18 129 patients with at least five prescribed drugs at discharge. Medical and surgical diagnoses were coded based  
19 130 on the ICD-10 and CHOP (43). Drug classification was based on the WHO’s ATC Classification System  
20 131 (44).

21 132 The strategy for transforming and synthesising the data extracted from the register’s multiple dataset  
22 133 sources was based on Olsen’s register-based methodological considerations (45) and has been  
23 134 documented elsewhere (46). Our dataset was composed of 20,422 hospital admission records running  
24 135 from January 2015 to December 2018, with similar numbers of annual hospital admissions: 5134, 5095,  
25 136 5125, and 5068, respectively.

### 37 139 **Dataset Customisation for Predictive Analysis**

38 140 The dataset was recoded and customised to identify the frequency of older patients’ hospital admissions.  
39 141 Each subject’s unique identifier was used to distinguish their different hospital stays from 2015–2018.  
40 142 The dataset included 13,802 readmissions involving 8,878 different older inpatients discharged home,  
41 143 readmitted to hospital within 30 days and whose data were complete (no missing values).  
42 144 Sociodemographic and clinical data were considered independent variables and used to compute the  
43 145 predictive models. Readmission following discharge home was defined as the dependent variable of  
44 146 interest and was dichotomised (0 = no, 1 = yes) based on 30-day readmission between 2015 and 2018.  
45 147 Furthermore, the custom dataset was composed of six clinical clusters based on agglomerative  
46 148 hierarchical clustering methods for identifying clinically relevant characteristics and representing older  
47 149 inpatients’ health status. Medical status and drugs data were recoded and copied to an exploitable  
48 150 population database (46).

### 56 152 **Sociodemographic Variables and Length of Stay**

57 153 The sociodemographic data set—almost exclusively composed of ordinal variables—included two  
58 154 categorical variables (sex and place of discharge from hospital) and three continuous variables (age and  
59  
60

1  
2  
3  
4 155 admission and discharge dates). Sex and age were included in the analysis as sociodemographic control  
5 156 variables. Age was considered a continuous variable as its progressive impact has been proven in  
6 157 preliminary investigations and previous studies (47).  
7  
8  
9 158

### 10 159 **Health Variables**

11 160 Numerous variables were used to describe older patients' health status during each hospital stay. The  
12 161 health dataset was composed of 23 categorical variables: 21 measured as ordinal variables (mobility,  
13 162 changing position, falls in the last year, etc.) and two measured as nominal variables (altered gait and  
14 163 chronic pain). A cleaner, better-structured dataset—composed of hierarchical clusters—was obtained in a  
15 164 previous study combining empirical and best-practice statistical approaches (46). Three of six  
16 165 preliminarily computed hierarchical clusters were included in the modeling analysis as confounding  
17 166 variables: the mobility cluster, the dependency in the activities of daily living cluster and the mental state  
18 167 cluster (46). These three clusters were selected because of their significant contributions to hospital  
19 168 readmissions (48-50). The dataset of medical information was composed of patients' principal medical  
20 169 diagnosis and four secondary medical diagnoses, based on the ICD-10. Finally, the year of hospitalisation  
21 170 was introduced as a control variable, based on the fact that earlier admission to hospital during this period  
22 171 led to a higher probability of unplanned readmissions during the entire period covered.  
23  
24  
25  
26  
27  
28  
29 172

### 30 173 **Included Drugs**

31 174 The hospital dataset showed that discharged patients had been prescribed 2,370 different drugs. Drug  
32 175 prescriptions were considered continuous, classified according to the WHO's ATC Classification System  
33 176 (51) and then included in the predictive model as independent variables. To ensure robust statistical  
34 177 results, the model only included drug categories prescribed to at least 30 inpatients who were readmitted  
35 178 within 30 days. Supplementary File 1 presents the prescribed ATC classified drugs included in the  
36 179 predictive model as independent variables.

37 180 For statistical purposes, drug–drug interactions between different ATC drug classes (51) were  
38 181 operationalised as dichotomised variables (0 = no simultaneous use of drugs from both classes,  
39 182 1 = simultaneous use of drugs from both classes) and added to the previous model. Drug class interactions  
40 183 were selected based on a literature review, significant ORs and expert opinions (52).

### 41 184 **Data analysis strategy**

42 185 Data were extracted into a Microsoft Excel spreadsheet (Microsoft, Redmond, Washington, United  
43 186 States) and then imported into SPSS software, version 26.0 (IBM Corp, Armonk, New York, United  
44 187 States). We examined statistical associations between hospital readmissions and patient age and sex,  
45 188 LOS, principal and related ICD-10 diagnoses, CHOP interventions and drug prescriptions during  
46 189 hospitalisations. A causality analysis between those variables was impossible given our retrospective data  
47 190 collection method, our inability to calculate the time between drug intake and readmission, and the  
48 191 potential drug changes between hospitalisation sequences. We conducted a bivariate analysis relating the  
49 192 independent variables to 30-day readmission after discharge home from 2015–2018. Next, we calculated  
50 193 a series of multilevel logistic regression models for binary outcomes explaining the readmissions, within  
51  
52  
53  
54  
55  
56  
57  
58  
59  
60



1  
2  
3  
4 194 30 days, of patients discharged home (0 = no, 1 = yes). These hierarchical models included two levels: the  
5  
6 195 first level concerned hospital stays themselves, nested in the second level, that of individuals. Firstly, we  
7  
8 196 computed a baseline multilevel binary logistic regression model to estimate how sets of predictors  
9  
10 197 influenced the probability of 30-day hospital readmission, which included individuals' characteristics,  
11  
12 198 health conditions and hospital LOS. Secondly, we completed this baseline model with the drugs  
13  
14 199 prescribed to older inpatients on their discharge home. Finally, to that baseline model completed with  
15  
16 200 prescribed drugs, we added the known drug–drug interactions between different ATC drug classes, based  
17  
18 201 on a literature review and expert opinions. The model computed each predictor's impact, other things  
19  
20 202 being equal, by estimating its net impact, controlling for other factors (adjusted ORs). The model also  
21  
22 203 considered correlations between each subject's different variables, which were generally not independent  
23  
24 204 (53). The model's random intercept design allowed each individual's intercept to vary, assuming that  
25  
26 205 some unmeasured traits remained stable over time and allowing a better estimation of the model's  
27  
28 206 parameters. The estimated parameters, on the other hand, had the same effect on every subject. Since the  
29  
30 207 data were based on the whole population—not a sample—of polymedicated older inpatients discharged  
31  
32 208 home from the Valais Hospital, the ORs' confidence intervals and statistical tests were used to indicate  
33  
34 209 the robustness of relationships (they usually only make sense for statistical inference).

27 210 ~~In a second stage,~~

29 211

30 212

31 213

#### 33 214 **Patients and public involvement**

35 215 Patients were not involved in the development of the research questions, study design, outcome measures  
36 216 and conduct of the study.

37 217

#### 39 218 **Results**

##### 41 219 **Descriptive results**

42 220 The electronic records of 20,422 inpatient stays by polymedicated, home-dwelling older adults included  
43 221 the 13,802 hospital readmissions of 8,878 different older inpatients previously discharged home—an  
44 222 average of 1.55 inpatient hospital readmissions. The total sample's mean age was 77.77 years old  
45 223 (SD = 7.48), and 57% were men (Table 1). The average hospital LOS was 8.44 days (SD = 7.58). At  
46 224 discharge, 25% of the sample had impaired mobility, 4% were impaired in their activities of daily living  
47 225 and 4% showed mental impairment. Our sample population averaged 4.58 (SD = 0.92) ICD-10 diagnoses  
48 226 and 1.83 (SD = 1.76) surgical interventions (CHOP) performed during hospitalisation. The selected  
49 227 medical diagnoses distinguished patients affected by circulatory (24%), infectious (3%) and respiratory  
50 228 diseases (11%), as well as trauma (8%) and tumours (11%). On average, 8.95 (SD = 3.24) drugs were  
51 229 prescribed per patient at hospital discharge.

52 230 **[Insert Table 1]**

53 231

54 232

55 233

56 234

57 235

58 236

59 237

60 238

1  
2  
3  
4 232 **Associations between Thirty-day Hospital Readmission Risk and Sociodemographic Characteristics**  
5  
6 233 **and Medical Conditions**

7 234 The rate of 30-day hospital readmission for older patients discharged home was 7.8%. Bivariate  
8 235 associations with chi-square tests showed significant differences between older inpatients'  
9  
10 236 sociodemographic characteristics and medical conditions (Table 2). Men showed a slightly higher  
11 237 proportion of 30-day hospital readmissions than women (8.2% vs 7.3%). However, age did not  
12  
13 238 significantly affect the probability of 30-day readmission. More readmissions were also seen among older  
14 239 patients with a circulatory disease (8.2% vs 6.5%), those not affected by trauma (8.0% vs 5.8%), and  
15  
16 240 especially those with a tumour (15.1% vs 6.9%). Multimorbidity also increased the risk of 30-day hospital  
17 241 readmissions—from 1.5% for older patients with a single ICD-10 condition to 8.8% for those with five.

18 242 [Insert Table 2]

19  
20 243

21 244 **Associations between Thirty-day Hospital Readmission Risk and Drugs**

22  
23 245 On average, older patients readmitted within 30 days had more prescribed drugs than those who were not  
24 246 readmitted (9.95 drugs vs 8.87). We found a linear relationship between the 30-day readmission rate and  
25  
26 247 the average number of prescribed drugs ( $p > 0.001$ ), which supported the absence of a cut-off point in this  
27 248 relationship (Figure 1).

28  
29 249 [Insert Figure 1]

30 250

31 251 Among the most robust statistical associations (chi-square tests) with 30-day hospital readmissions  
32 252 involved the classes of drugs including antineoplastics and immunomodulators (12.6% vs 7.6% for those  
33 253 not treated with them) and taking antiemetics and antinauseants (27.7% vs 7.7%). There was also a higher  
34  
35 254 risk of 30-day hospital readmission among older inpatients taking drugs for functional gastrointestinal  
36 255 disorders (13.4% vs 7.4%) and antihypertensives (14.1% vs 7.7%) (Table 3).

37 256 [Insert Table 3]

38  
39 257

40 258 **Baseline Multivariate Model**

41  
42  
43 259 A baseline, multivariate logistic regression model including older patients' sociodemographic and clinical  
44 260 variables, but not their prescribed drugs at discharge, was computed to predict 30-day hospital  
45  
46 261 readmission after discharge home (Table 4). Neither sex nor age had a significant impact. On the  
47 262 contrary, LOS had a significant impact (OR = 1.014 for each additional day; 95% CI: 1.006–1.021), as  
48 263 did mobility (OR = 1.218 for older patients with an impaired mobility status; 95% CI: 1.039–1.427).  
49  
50 264 Dependence in the activities of daily living and mental health status showed no influence. Concerning  
51 265 diagnoses measured in the ICD-10, we found that older patients with a tumoural disease (OR = 2.538;  
52  
53 266 95% CI: 2.089–3.082) were much more susceptible to 30-day hospital readmission. Patients with  
54 267 circulatory pathologies showed no difference from the reference category (OR = 0.938; 95% CI: 0.783–  
55  
56 268 1.124), and nor did those with respiratory problems (OR = 1.100; 95% CI: 0.875–1.382), trauma  
57 269 (OR = 0.847; 95% CI: 0.633–1.134) or infection-related problems (OR = 1.381; 95% CI: 0.964–1.977;  
58  
59 270  $p = 0.078$ ). Multimorbidity predicted a higher probability of readmission (OR = 1.419 per additional ICD-

1  
2  
3  
4 271 10 condition; 95% CI: 1.282–1.572), whereas the number of surgical procedures had no noticeable impact  
5 272 (OR = 0.978; 95% CI: 0.938–1.020). The year of hospital stay did have an impact, however, as the earlier  
6 273 the hospitalisation during the four years under review, the higher the probability of readmission  
7 274 (OR = 0.933 per additional year; 95% CI: 0.880–0.990).

8 275 Some variables that were non-significant in bivariate analyses became significant in multivariate  
9 276 analyses. This was because the results of multivariate analyses were controlled by all the other parameters  
10 277 and interpretations were made with “other things being equal”. Also, the composition of subgroups could  
11 278 be very different in some bivariate analyses.

12 279 [Insert Table 4]

13 280

### 14 281 **Prediction of 30-day Hospital Readmission and Drug Prescriptions**

15 282 Table 5 presents the baseline logistic regression model completed with the drugs prescribed to older  
16 283 patients at discharge home that were significantly associated ( $p = < 0.05$ ) with 30-day hospital  
17 284 readmission. It was not possible to introduce the total number of drugs prescribed jointly in this model  
18 285 because of their collinearity with other drug variables. Non-significant drugs and other variables have  
19 286 been omitted from Table 3 in order to simplify the presentation. The probabilities of 30-day hospital  
20 287 readmission are presented in descending order of discharged older patients' ORs for each additional unit  
21 288 of the drugs in question. Intake of antiemetics and antinauseants was very strongly linked to 30-day  
22 289 readmission (OR = 3.216 for each additional drug unit taken; 95% CI: 1.842–5.617), as were those of  
23 290 antihypertensives (OR = 1.771; 95% CI: 1.287–2.438), gastrointestinal drugs (OR = 1.424; 95% CI:  
24 291 1.166–1.739), systemic hormonal preparations (OR = 1.207; 95% CI: 1.052–1.385) and vitamins  
25 292 (OR = 1.201; 95% CI: 1.049–1.374). On the contrary, the intake of lipid-modifying agents was associated  
26 293 with a decrease in 30-day hospital readmissions (OR = 0.841 for each drug from this class prescribed;  
27 294 95% CI: 0.732–0.967).

28 295 [Insert Table 5]

29 296

### 30 297 **Drug Interactions and 30-day Hospital Readmissions**

31 298 The model considered drug class interactions for the: 1) cardiovascular system \* central nervous system,  
32 299 gastrointestinal system, and metabolism \* cardiovascular system; 2) gastrointestinal system and  
33 300 metabolism \* central nervous system; 3) cardiovascular system \* anti-infectives; and 4) central nervous  
34 301 system \* anti-infectives. The analysis was carried out controlling for the basic model's variables (Table  
35 302 4), and the table reports the ORs for each additional unit of the statistically significant drugs in question,  
36 303 as well as for significant drug interactions. Antiemetics and antinauseants were very strongly associated  
37 304 with 30-day readmission (OR = 3.222; 95% CI: 1.844–5.630), as were drugs regulating the  
38 305 gastrointestinal tract (OR = 1.428; 95% CI: 1.169–1.744) and systemic hormones (OR = 1.210; 95% CI:  
39 306 1.054–1.390). The joint intake of beta-blocking agents and drugs for acid-related disorders was  
40 307 significantly associated with 30-day hospital readmission (OR = 1.367; 95% CI: 1.046–1.788); this is the  
41 308 only significant drug interaction in Table 4. On the contrary, lipid-modifying agents were associated with

1  
2  
3  
4 309 lower 30-day hospital readmission (OR = 0.838), as were substances acting on the renin–angiotensin  
5 310 system (OR = 0.892; 95% CI: 0.796–0.999) (Table 6).

6 311 [Insert Table 6]

7 312

## 8 313 **Discussion**

9  
10 314 The present study examined the records of 20,422 hospitalisations involving polymedicated home-  
11 315 dwelling older patients, eventually discharged home, for the risk of 30-day hospital readmission. These  
12 316 records were held in four years of a comprehensive hospital register. The 8,878 individual older patients  
13 317 readmitted to the Valais Hospital showed a 30-day hospital readmission rate of almost 8%, corroborating  
14 318 previously published all-cause hospital readmission rates among home-dwelling older patients (9, 27).  
15 319 However, Jencks *et al.* (2009) found a much higher 30-day readmission rate, reaching almost 20% among  
16 320 discharged older patients who had been hospitalised in acute medicine and surgery wards (3). As a  
17 321 bivariate association, multimorbid men were at a significantly higher risk of readmission than  
18 322 multimorbid women; however, in the adjusted multivariate analysis, that significance disappeared.  
19 323 Medical conditions, PP and multiple classes of prescribed drugs were all associated with higher 30-day  
20 324 readmission rates, in line with previous studies (27, 54-56).  
21 325 Our study found no significant differences in the risks of 30-day hospital readmission for men and  
22 326 women. However, some previous research found that men were more likely to forget to take their drugs  
23 327 or to not apply the changed drug dosages prescribed by their family physician, consequently increasing  
24 328 their risk of hospital readmission for drug-related problems (57). Opposite results were found in a  
25 329 population-based study by Manteufel *et al.* (58), with women being less likely than men to properly  
26 330 adhere to their drug prescriptions. These differences may indicate a need for more personalised drug  
27 331 prescription and drug management to improve clinical outcomes. Further research should explore  
28 332 associations between different types of drugs and sex (58, 59), but this topic was beyond the present  
29 333 study's scope. Another interesting issue regarding sex differences in hospital readmission rates is the  
30 334 study window. Some studies found higher rates among men than among women below three-month  
31 335 readmissions. More extended time windows (e.g. one year) revealed no significant sex differences (54,  
32 336 60). An analysis of our dataset using a more extended readmission window might clarify this point and  
33 337 provide complementary knowledge about sex-associated hospital readmissions.  
34 338 Our results indicated that ageing was not a risk factor for increased 30-day hospital readmission, in line  
35 339 with some previous publications (55, 61). However, other research findings demonstrated that age was  
36 340 only positively associated with the likelihood of readmission up to 74 years old; above that, there no  
37 341 longer appeared to be any significant relationship between age and readmission (62, 63). These  
38 342 contrasting results may be explained by the studies' designs, country settings, the ages of their research  
39 343 populations or the medical conditions included (55, 62, 64).  
40 344 Longer hospital stays were also associated with a higher risk of hospital readmission, in line with a cohort  
41 345 study by Sud *et al.* concluding that an extended hospital LOS was associated with increased rates of all  
42 346 types of readmission, except for hospitalisation after heart failure, where a short LOS was associated with  
43 347 increased rates of readmission for cardiovascular disease and heart failure (65).  
44  
45  
46  
47  
48  
49  
50  
51  
52  
53  
54  
55  
56  
57  
58  
59  
60

1  
2  
3  
4 348 Our results indicated a significant positive association between the number of a patient's medical  
5 349 conditions and the 30-day hospital readmission rate, confirming other recent retrospective hospital  
6 350 register studies (66, 67). More specifically, older patients with impaired mobility showed an increased  
7 351 risk of hospital readmission. This result was not surprising, bearing in mind that although these older  
8 352 patients were discharged home—and not to a nursing home—after their hospital stay, their health status  
9 353 might nevertheless require future readmission. Indeed, this corroborated publications about older patients  
10 354 discharged after orthopaedic treatment or who had been initially admitted for heart failure, myocardial  
11 355 infarction or pneumonia, but also presented with impaired mobility (68, 69).  
12 356 Cognitive impairment was not associated with increased 30-day hospital readmission rates, in line with  
13 357 findings from the systematic review by Pickens *et al.*, which pointed out that dementia had a modest  
14 358 impact on readmission rates (70). It was no surprise that inpatients hospitalised for cancer faced a high  
15 359 risk of readmission, corroborating prior studies by Buhenn *et al.*, Chang *et al.* and Butcher (71-73).  
16 360 PP significantly increased the 30-day hospital readmission rate, but this result was based on the average  
17 361 number of drugs prescribed to the sample of readmitted patients versus those not readmitted. Although PP  
18 362 was confirmed as a strong determinant of 30-day hospital readmission in publications by Leendertse *et al.*  
19 363 (74, 75), our results showed a progressive linear relationship between PP and readmission rate, and this  
20 364 should be interpreted with caution. Despite our results and other publications and research underlining the  
21 365 challenge of PP among multimorbid older patients, there is no overall consensus about the best way to  
22 366 deal with the broad general relationship between PP and hospital readmission (76).  
23 367 Our advanced statistical analysis demonstrated that some specific drugs and the concomitant use of  
24 368 specific drug combinations were significantly associated with 30-day readmission risk, although this was  
25 369 not unexpected and has been confirmed in previous publications (37, 77). Mostly in line with the research  
26 370 findings of Zhang *et al.*, drugs including hormones, antineoplastics, immunosuppressors, neoplastic  
27 371 antibiotics and bacterial vaccines were substantial risk factors for hospital readmission (7).  
28 372 In summary, extended hospital LOS, functional impairments, medical conditions and drugs have been  
29 373 demonstrated to be determinants of 30-day hospital readmission, although not all of them have clinically  
30 374 or pharmacologically relevant interpretations or explanations. Further research involving large samples is  
31 375 needed, notably to explore the drug–drug interactions with the highest risk of hospital readmissions.  
32 376 Statistical predictions of potential drug–drug interactions provide important information for modeling  
33 377 drug combinations and identifying pairs of drugs whose combination creates an exaggerated response (9).  
34 378 As the association between the number of drugs and the risk of hospital readmission was linear, more  
35 379 advanced inferential statistics would be needed to clarify a cut-off point for the mean number of drugs  
36 380 that would significantly increase the readmission rate. In addition, problems involving adherence to  
37 381 prescriptions, social support networks, and stronger or weaker primary health-care structures can all  
38 382 influence hospital readmission rates (39). According to some publications, nearly 70% of people aged  
39 383 over 65 make mistakes with their drugs (78, 79). Information about drug adherence, drug underuse and  
40 384 overuse, drug changes and deprescription by family physicians, as well as medication management at  
41 385 home, would contribute to a more comprehensive understanding of disease- and drug-related 30-day  
42 386 hospital readmissions.



1  
2  
3  
4 387 Finally, it would be interesting to explore the risks of readmission according to different hospital wards.  
5 388 As psychiatric conditions are a frequent cause of rehospitalisation (80), it would be relevant for future  
6 389 research to explore registries from adult psychiatry departments and investigate the hospital readmission  
7 390 risks faced by their inpatients.

### 391 **Strengths and Limitations**

392 This study's main strength was its use of data recorded in a comprehensive register. We consider this  
393 retrospective study useful for clinical practice and future research because a whole series of  
394 sociodemographic and clinical parameters, medical conditions and prescribed drugs were used to predict  
395 the probability of hospital readmission. Using both bivariate and multivariate analyses enabled an  
396 evaluation of the data's longitudinal nature.  
397 Our study had several limitations, nevertheless. The design did not allow us to identify hospitalisations  
398 and readmissions lost-to-follow-up and to adjust our data for death outside the hospital. We were also  
399 unable to identify unnecessary hospitalisations or any bias towards hospitalisation rather than another  
400 health-care solution for older inpatients. Our dataset could not inform us about whether older inpatients  
401 had been first admitted to another hospital or were subsequently readmitted elsewhere during the study  
402 period. Because the reasons for hospital admission are not chosen from a list but are entered into the  
403 register as free descriptive text, these factors were not part of our dataset, and the study was unable to  
404 explore the reasons for an admission's impact on 30-day rehospitalisation. Another limitation was the  
405 study's lack of formal screening methods to explain ADEs in detail, and it was impossible to distinguish  
406 between elective and urgent hospitalisations. Although the study considered statistical associations  
407 between drugs and rehospitalisations, it did not use clinically diagnosed drug–drug interactions. Finally,  
408 we were unable to consider any potential causality between PP and hospital readmission.

409

### 410 **Conclusions**

411 Hospital length of stay, medical conditions, functional impairments and prescribed drugs were all critical  
412 factors in predicting hospital readmissions, thus affirming our hypotheses. Readmission patterns are  
413 complex and poorly understood because older patients often present with multiple chronic conditions,  
414 functional impairments and complex drug prescriptions. Hospital readmission is an under-investigated  
415 topic deserving of additional, well-conducted, predictive research exploiting accurate longitudinal data  
416 from large samples.

417

### 418 **Acknowledgments**

419 The authors thank the partner hospital, including the hospital's data warehouse, for its valuable  
420 contributions. This research was developed, in part, using grants from the Swiss National Science  
421 Foundation and the School of Health Sciences of the University of Applied Sciences and Arts Western  
422 Switzerland (HES-SO) Valais/Wallis. The funders had no role in the design and conduct of the study, the  
423 collection, management, analysis and interpretation of the data, the preparation, review or approval of the  
424 manuscript, or the decision to submit the manuscript for publication.

### 425 **Authors Contributions**

1  
2  
3  
4 426 BW, FP, and HV had the original idea. BW, ZT, SdG, MMM and HV provided conceptual and  
5 427 methodological expertise to the study design and BW, FP, ZT, SdG, CMM, AvG and HV to data analysis  
6 428 and interpretation. BW, FP, and HV were major contributors to writing the manuscript. All authors read,  
7 429 edited, and approved the final manuscript.  
8  
9

10 430

#### 11 431 **Funding**

12  
13 432 This study was supported by the Swiss National Science Foundation via grant number 407440\_183434/1.

#### 14 433 **Competing interest**

15  
16 434 The authors report no conflicts of interest surrounding this work.

#### 17 435 **Ethics approval and patient consent**

18  
19 436 Ethical approval was obtained from the Human Research Ethics Committee of the Canton of Vaud (CER-  
20 437 VD, 2018-02196), thus permitting our partner hospital's data warehouse to provide the appropriate  
21 438 dataset. Given the retrospective data source, obtaining consent from the patients concerned was  
22 439 impossible or posed disproportionate difficulties. The present study respects the legal requirements for  
23 440 research projects involving data re-use without consent, as set out in Art. 34 from the Swiss Human  
24 441 Research Act (HTA).

#### 25 442 **Data sharing statement**

26  
27 443 As part of the Data Use Agreement, authors are not allowed to provide raw data. Upon a reasonable  
28 444 request, the corresponding author will provide statistical programming code used to generate results.

29 445 **Word Count:** 4,158  
30  
31

32 446

33 447 Figure 1. Relationship between 30-day readmission rate and the number of prescribed drugs at discharge.  
34  
35  
36

37 448

#### 38 449 **References**

- 39  
40  
41 450 1. Rayan-Gharra N, Rn ES, Tadmor B, Flaks-Manov N, Balicer RD. Patients' ratings of the  
42 451 in-hospital discharge briefing and post-discharge primary care follow-up: the association with  
43 452 30-day readmissions. *Patient Education and Counseling*. 2019.  
44 453 2. Kabue S, Greene J, Kipnis P, Lawson B, Rinetti-Vargas G, Liu V, et al. The Impact of  
45 454 Pharmacy-specific Predictors on the Performance of 30-Day Readmission Risk Prediction  
46 455 Models. *Med Care*. 2019;57(4):295-9.  
47 456 3. Jencks SF, Williams MV, Coleman EA. Rehospitalizations among Patients in the  
48 457 Medicare Fee-for-Service Program. *New England Journal of Medicine*. 2009;360(14):1418-28.  
49 458 4. Covinsky KE, Palmer RM, Fortinsky RH, Counsell SR, Stewart AL, Kresevic DM. Loss of  
50 459 independence in activities of daily living in older adults hospitalised with medical illness:  
51 460 increased vulnerability with age. *JAGS*. 2003;51.  
52 461 5. Hansen LO, Young RS, Hinami K, Leung A, Williams MV. Interventions to reduce 30-day  
53 462 rehospitalization: a systematic review. *Ann Intern Med*. 2011;155(8):520-8.  
54 463 6. Davies EC, Green CF, Mottram DR, Rowe PH, Pirmohamed M. Emergency re-admissions  
55 464 to hospital due to adverse drug reactions within 1 year of the index admission. *British Journal*  
56 465 *of Clinical Pharmacology*. 2010;70(5):749-55.  
57  
58  
59  
60

- 1  
2  
3  
4 466 7. Zhang M, Holman CDAJ, Price SD, Sanfilippo FM, Preen DB, Bulsara MK. Comorbidity  
5 467 and repeat admission to hospital for adverse drug reactions in older adults: retrospective  
6 468 cohort study. *BMJ*. 2009;338:a2752.
- 7  
8 469 8. Bonnet-Zamponi D, d'Arailh L, Konrat C, Delpierre S, Lieberherr D, Lemaire A, et al.  
9 470 Drug-Related Readmissions to Medical Units of Older Adults Discharged from Acute Geriatric  
10 471 Units: Results of the Optimization of Medication in AGEd Multicenter Randomized Controlled  
11 472 Trial. *Journal of the American Geriatrics Society*. 2013;61(1):113-21.
- 12 473 9. Blanc A-L, Fumeaux T, Stirnemann J, Dupuis Lozeron E, Ourhamoune A, Desmeules J, et  
13 474 al. Development of a predictive score for potentially avoidable hospital readmissions for  
14 475 general internal medicine patients. *PLOS ONE*. 2019;14(7):e0219348.
- 15 476 10. Stevenson JM, Davies JG, Martin F, Ali K, Rajkumar C, Schiff R. Is medication related  
16 477 harm as a cause of readmission associated with the indicators of frailty? *Age and Ageing*.  
17 478 2018;47:ii19.
- 18  
19 479 11. Brunner-La Rocca H-P, Peden CJ, Soong J, Holman PA, Bogdanovskaya M, Barclay L.  
20 480 Reasons for readmission after hospital discharge in patients with chronic diseases—  
21 481 Information from an international dataset. *PloS one*. 2020;15(6):e0233457.
- 22 482 12. Dharmarajan K, Hsieh AF, Lin Z, Bueno H, Ross JS, Horwitz LI, et al. Hospital  
23 483 readmission performance and patterns of readmission: retrospective cohort study of Medicare  
24 484 admissions. *Bmj*. 2013;347.
- 25 485 13. Arora S, Patel P, Lahewala S, Patel N, Patel NJ, Thakore K, et al. Etiologies, trends, and  
26 486 predictors of 30-day readmission in patients with heart failure. *The American journal of*  
27 487 *cardiology*. 2017;119(5):760-9.
- 28 488 14. Shams I, Ajorlou S, Yang K. A predictive analytics approach to reducing 30-day  
29 489 avoidable readmissions among patients with heart failure, acute myocardial infarction,  
30 490 pneumonia, or COPD. *Health care management science*. 2015;18(1):19-34.
- 31 491 15. Krumholz HM, Wang K, Lin Z, Dharmarajan K, Horwitz LI, Ross JS, et al. Hospital-  
32 492 readmission risk—isolating hospital effects from patient effects. *New England Journal of*  
33 493 *Medicine*. 2017;377(11):1055-64.
- 34 494 16. Gruneir A, Fung K, Fischer HD, Bronskill SE, Panjwani D, Bell CM, et al. Care setting and  
35 495 30-day hospital readmissions among older adults: a population-based cohort study. *CMAJ*.  
36 496 2018;190(38):E1124-E33.
- 37 497 17. Marengoni A, Angleman S, Melis R, Mangialasche F, Karp A, Garmen A, et al. Aging  
38 498 with multimorbidity: A systematic review of the literature. *Ageing Research Reviews*.  
39 499 2011;10:430-9.
- 40 500 18. Valderas JM, Starfield B, Sibbald B, Salisbury C, Rloand M. Defining comorbidity:  
41 501 implications for understanding health and health services. *Annals Of Family Medicine*.  
42 502 2009;7:357-63.
- 43 503 19. Maher RL, Hanlon J, Hajjar ER. Clinical consequences of polypharmacy in elderly.  
44 504 *Expert Opinion on Drug Safety*. 2014;13:57-65.
- 45 505 20. Masnoon N, Shakib S, Kalisch-Ellett L, Caughey GE. What is polypharmacy? A  
46 506 systematic review of definitions. *BMC Geriatrics*. 2017;17:1-10.
- 47 507 21. Wastesson JW, Morin L, Tan ECK, Johnell K. An update on the clinical consequences of  
48 508 polypharmacy in older adults: a narrative review. *Expert Opin Drug Saf*. 2018;17(12):1185-96.
- 49 509 22. Rieckert A, Trampisch US, Klaaßen-Mielke R, Drewelow E, Esmail A, Johansson T, et al.  
50 510 Polypharmacy in older patients with chronic diseases: a cross-sectional analysis of factors  
51 511 associated with excessive polypharmacy. *BMC Family Practice*. 2018;19(1):113.
- 52 512 23. Magill SS, Edwards JR, Bamberg W, Beldavs ZG, Dumyati G, Kainer MA, et al. Multistate  
53 513 point-prevalence survey of health care-associated infections. *N Engl J Med*.  
54 514 2014;370(13):1198-208.

- 1  
2  
3  
4 515 24. Coleman EA, Smith JD, Raha D, Min SJ. Posthospital medication discrepancies:  
516 prevalence and contributing factors. *Arch Intern Med*. 2005;165(16):1842-7.
- 6 517 25. Ferreri SP, Hughes TD, Snyder ME. Medication Therapy Management: Current  
7 518 Challenges. *Integr Pharm Res Pract*. 2020;9:71-81.
- 9 519 26. Roux P, Verloo H, Santiago-Delefosse M, Pereira F. The spatial dimensions of  
10 520 medication management by home-dwelling older adults after hospital discharge. *Health &*  
11 521 *Place*. 2019;60:102230.
- 12 522 27. El Morabet N, Uitvlugt EB, van den Bemt BJB, van den Bemt P, Janssen MJA, Karapinar-  
13 523 Çarkit F. Prevalence and Preventability of Drug-Related Hospital Readmissions: A Systematic  
14 524 Review. *J Am Geriatr Soc*. 2018;66(3):602-8.
- 15 525 28. Forster AJ, Murff HJ, Peterson JF, Gandhi TK, Bates DW. The incidence and severity of  
16 526 adverse events affecting patients after discharge from the hospital. *Ann Intern Med*.  
17 527 2003;138(3):161-7.
- 19 528 29. Yeo I, Cheung JW, Feldman DN, Amin N, Chae J, Wong SC, et al. Assessment of Hospital  
20 529 Readmission Rates, Risk Factors, and Causes After Cardiac Arrest: Analysis of the US  
21 530 Nationwide Readmissions Database. *JAMA Network Open*. 2019;2(9):e1912208-e.
- 22 531 30. Hauviller L, Eyvrand F, Garnault V, Rousseau V, Molinier L, Montastruc JL, et al. Hospital  
23 532 re-admission associated with adverse drug reactions in patients over the age of 65 years.  
24 533 *European Journal of Clinical Pharmacology*. 2016;72(5):631-9.
- 25 534 31. Davies EC, Green CF, Mottram DR, Rowe PH, M P. Emergency re-admissions to hospital  
26 535 due to adverse drug reactions within 1 year of the index admission. *Br J Clin Pharmacol*.  
27 536 2010;70:749-55.
- 29 537 32. Samoy LJ, Zed PJ, Wilbur K, Balen RM, Abu-Laban RB, Roberts M. Drug-related  
30 538 hospitalizations in a tertiary care internal medicine service of a Canadian hospital: a  
31 539 prospective study. *Pharmacotherapy*. 2006;26(11):1578-86.
- 32 540 33. Teymoorian SS, Dutcher D, Woods M. ASSOCIATION BETWEEN POSTDISCHARGE  
33 541 ADVERSE DRUG REACTIONS AND 30-DAY HOSPITAL READMISSION IN PATIENTS AGED 80 AND  
34 542 OLDER. *Journal of the American Geriatrics Society*. 2011;59(5):948-9.
- 35 543 34. WHO. ADHERENCE TO LONG-TERM THERAPIES: Evidence for action. Geneva: World  
36 544 Health Organisation; 2003.
- 38 545 35. Brahma DK, Wahlang JB, Marak MD, Ch Sangma M. Adverse drug reactions in the  
39 546 elderly. *J Pharmacol Pharmacother*. 2013;4(2):91-4.
- 40 547 36. Davies EA, O'Mahony MS. Adverse drug reactions in special populations - the elderly.  
41 548 *Br J Clin Pharmacol*. 2015;80(4):796-807.
- 42 549 37. Moura CS, Tavares LS, Acurcio Fde A. [Hospital readmissions related to drug  
43 550 interactions: a retrospective study in a hospital setting]. *Rev Saude Publica*. 2012;46(6):1082-9.
- 44 551 38. Spinks JM, Kalisch Ellett LM, Spurling G, Theodoros T, Williamson D, Wheeler AJ.  
45 552 Adaptation of potentially preventable medication-related hospitalisation indicators for  
46 553 indigenous populations in Australia using a modified Delphi technique. *BMJ Open*.  
47 554 2019;9(11):e031369.
- 49 555 39. Rosen OZ, Fridman R, Rosen BT, Shane R, Pevnick JM. Medication adherence as a  
50 556 predictor of 30-day hospital readmissions. *Patient Prefer Adherence*. 2017;11:801-10.
- 51 557 40. Pellegrin KL, Lee E, Uyeno R, Ayson C, Goo R. Potentially preventable medication-  
52 558 related hospitalizations: A clinical pharmacist approach to assessment, categorization, and  
53 559 quality improvement. *Journal of the American Pharmacists Association*. 2017;57(6):711-6.
- 54 560 41. Pereira F, Roux P, Santiago-Delefosse M, von Gunten A, Wernli B, Martins MM, et al.  
55 561 Optimising medication management for polymedicated home-dwelling older adults with  
56 562 multiple chronic conditions: a mixed-methods study protocol. *BMJ Open*. 2019;9(10):e030030.

- 1  
2  
3  
4 563 42. Benchimol EI, Smeeth L, Guttman A, Harron K, Moher D, Petersen I, et al. The  
5 564 REporting of studies Conducted using Observational Routinely-collected health Data (RECORD)  
6 565 Statement. PLOS Medicine. 2015;12(10):e1001885.  
7  
8 566 43. Surgical interventions classification S. Swiss classification of surgical interventions  
9 567 (CHOP). 2016.
- 10 568 44. Parker S, Prince A, Thomas L, Song H, Milosevic D, Harris MF. Electronic, mobile and  
11 569 telehealth tools for vulnerable patients with chronic disease: a systematic review and realist  
12 570 synthesis. BMJ Open. 2018;8(8).
- 13 571 45. Olsen J. Register-based research: some methodological considerations. Scandinavian  
14 572 journal of public health. 2011;39(3):225-9.
- 15 573 46. Taushanov Z, Verloo H, Wernli B, Di Giovanni S, von Gunten A, F P. Transforming a  
16 574 patient registry into a customised dataset for the advanced statistical analysis of health risk  
17 575 factors and for medication-related hospitalisation research: a retrospective hospital patient  
18 576 registry study. JMIR Medical Informatics. 2021.
- 19 577 47. Andrade C. Age as a variable: Continuous or categorical? Indian J Psychiatry.  
20 578 2017;59(4):524-5.
- 21 579 48. Gerka A LC, Pfingsthorn M, Eichelberg M, Muller S, Stolle C, Hein A, editor A Clustering-  
22 580 based Approach to Determine a Standardized Statistic for Daily Activities of Elderly Living  
23 581 Alone. . Proceedings of the 12th International Joint Conference on Biomedical Engineering  
24 582 Systems and Technologies; 2019: SCITEPRESS – Science and Technology Publications, Lda.
- 25 583 49. Trevithick L, Painter J, Keown P. Mental health clustering and diagnosis in psychiatric  
26 584 in-patients. BJPsych bulletin. 2015;39(3):119-23.
- 27 585 50. Delil S, Çelik RN, San S, Dundar M. Clustering patient mobility patterns to assess  
28 586 effectiveness of health-service delivery. BMC health services research. 2017;17(1):1-14.
- 29 587 51. WHO. The Anatomical Therapeutic Chemical Classification System with Defined Daily  
30 588 Doses (ATC/DDD) Geneva: World Health Organization; 2014 [24 March 2020]. Available from:  
31 589 <http://www.who.int/classifications/atcddd/en/>.
- 32 590 52. Haider SI, Johnell K, Thorslund M, Fastbom J. Trends in polypharmacy and potential  
33 591 drug-drug interactions across educational groups in elderly patients in Sweden for the period  
34 592 1992 - 2002. Int J Clin Pharmacol Ther. 2007;45(12):643-53.
- 35 593 53. Goldstein H. Nonlinear Multilevel Models, with an Application to Discrete Response  
36 594 Data. Biometrika. 1991;78(1):45-51.
- 37 595 54. Linkens AEMJH, Milosevic V, van der Kuy PHM, Damen-Hendriks VH, Mestres Gonzalvo  
38 596 C, Hurkens KPGM. Medication-related hospital admissions and readmissions in older patients:  
39 597 an overview of literature. International Journal of Clinical Pharmacy. 2020.
- 40 598 55. Berry JG, Gay JC, Joynt Maddox K, Coleman EA, Bucholz EM, O'Neill MR, et al. Age  
41 599 trends in 30 day hospital readmissions: US national retrospective analysis. BMJ.  
42 600 2018;360:k497.
- 43 601 56. Kongkaew C, Hann M, Mandal J, Williams SD, Metcalfe D, Noyce PR, et al. Risk factors  
44 602 for hospital admissions associated with adverse drug events. Pharmacotherapy.  
45 603 2013;33(8):827-37.
- 46 604 57. Thunander Sundbom L, Bingefors K. Women and men report different behaviours in,  
47 605 and reasons for medication non-adherence: a nationwide Swedish survey. Pharmacy practice.  
48 606 2012;10(4):207-21.
- 49 607 58. Manteuffel M, Williams S, Chen W, Verbrugge RR, Pittman DG, Steinkellner A.  
50 608 Influence of patient sex and gender on medication use, adherence, and prescribing alignment  
51 609 with guidelines. J Womens Health (Larchmt). 2014;23(2):112-9.
- 52 610 59. Thunander Sundbom L, Hedborg K. Association between prescribed antidepressants  
53 611 and other prescribed drugs differ by gender: a nationwide register-based study in Sweden.  
54 612 Nord J Psychiatry. 2019;73(1):73-9.



- 1  
2  
3  
4 613 60. Silverstein MD, Qin H, Mercer SQ, Fong J, Haydar Z. Risk Factors for 30-Day Hospital  
5 614 Readmission in Patients  $\geq 65$  Years of Age. *Baylor University Medical Center Proceedings*.  
6 615 2008;21(4):363-72.
- 7 616 61. Schwab C, Hindlet P, Sabatier B, Fernandez C, Korb-Savoldelli V. Risk scores identifying  
8 617 elderly inpatients at risk of 30-day unplanned readmission and accident and emergency  
9 618 department visit: a systematic review. *BMJ Open*. 2019;9(7):e028302.
- 10 619 62. Jain S, Khera R, Mortensen EM, Weissler JC. Readmissions of adults within three age  
11 620 groups following hospitalization for pneumonia: Analysis from the Nationwide Readmissions  
12 621 Database. *PLOS ONE*. 2018;13(9):e0203375.
- 13 622 63. Hasegawa K, Gibo K, Tsugawa Y, Shimada YJ, Camargo CA, Jr. Age-Related Differences  
14 623 in the Rate, Timing, and Diagnosis of 30-Day Readmissions in Hospitalized Adults With Asthma  
15 624 Exacerbation. *Chest*. 2016;149(4):1021-9.
- 16 625 64. Shebeshi DS, Dolja-Gore X, Byles J. Unplanned Readmission within 28 Days of Hospital  
17 626 Discharge in a Longitudinal Population-Based Cohort of Older Australian Women. *International  
18 627 Journal of Environmental Research and Public Health*. 2020;17(9):3136.
- 19 628 65. Sud M, Yu B, Wijeyesundera HC, Austin PC, Ko DT, Braga J, et al. Associations Between  
20 629 Short or Long Length of Stay and 30-Day Readmission and Mortality in Hospitalized Patients  
21 630 With Heart Failure. *JACC: Heart Failure*. 2017;5(8):578-88.
- 22 631 66. Donz  J, Lipsitz S, Bates DW, Schnipper JL. Causes and patterns of readmissions in  
23 632 patients with common comorbidities: retrospective cohort study. *Bmj*. 2013;347:f7171.
- 24 633 67. Hijazi HH, Alyahya MS, Hammouri HM, Alshraideh HA. Risk assessment of  
25 634 comorbidities on 30-day avoidable hospital readmissions among internal medicine patients. *J  
26 635 Eval Clin Pract*. 2017;23(2):391-401.
- 27 636 68. Falvey JR, Bade MJ, Hogan C, Forster JE, Stevens-Lapsley JE. Preoperative Activities of  
28 637 Daily Living Dependency is Associated With Higher 30-Day Readmission Risk for Older Adults  
29 638 After Total Joint Arthroplasty. *Clin Orthop Relat Res*. 2020;478(2):231-7.
- 30 639 69. Greysen SR, Stijacic Cenzer I, Auerbach AD, Covinsky KE. Functional impairment and  
31 640 hospital readmission in Medicare seniors. *JAMA Intern Med*. 2015;175(4):559-65.
- 32 641 70. Pickens S, Naik AD, Catic A, Kunik ME. Dementia and Hospital Readmission Rates: A  
33 642 Systematic Review. *Dementia and Geriatric Cognitive Disorders Extra*. 2017;7(3):346-53.
- 34 643 71. Chiang LY, Liu J, Flood KL, Carroll MB, Piccirillo JF, Stark S, et al. Geriatric assessment as  
35 644 predictors of hospital readmission in older adults with cancer. *J Geriatr Oncol*. 2015;6(4):254-  
36 645 61.
- 37 646 72. Butcher L. Oncologists Seek to Understand, Address Hospital Readmissions. *Oncology  
38 647 Times*. 2016;38(6):1,9-10.
- 39 648 73. Burhenn P, Sun C-L, Scher KS, Hsu J, Pandya P, Chui C-Y, et al. Predictors of hospital  
40 649 readmission among older adults with cancer. *J Geriatr Oncol*. 2020;11(7):1108-14.
- 41 650 74. Leendertse AJ, Egberts ACG, Stoker LJ, van den Bemt PMLA, Group HS. Frequency of  
42 651 and Risk Factors for Preventable Medication-Related Hospital Admissions in the Netherlands.  
43 652 *Archives of Internal Medicine*. 2008;168(17):1890-6.
- 44 653 75. Leendertse AJ, Van Den Bemt PM, Poolman JB, Stoker LJ, Egberts AC, Postma MJ.  
45 654 Preventable hospital admissions related to medication (HARM): cost analysis of the HARM  
46 655 study. *Value Health*. 2011;14(1):34-40.
- 47 656 76. Garfinkel D, Bilek A. Inappropriate medication use and polypharmacy in older people.  
48 657 *BMJ*. 2020;369:m2023.
- 49 658 77. Tesfaye WH, Peterson GM, Castelino RL, McKercher C, Jose MD, Wimmer BC, et al.  
50 659 Medication Regimen Complexity and Hospital Readmission in Older Adults With Chronic  
51 660 Kidney Disease. *Annals of Pharmacotherapy*. 2019;53(1):28-34.
- 52 661 78. Fialov D, Onder G. Medication errors in elderly people: contributing factors and  
53 662 future perspectives. *British journal of clinical pharmacology*. 2009;67(6):641-5.



- 663 79. Lavan AH, Gallagher PF, O'Mahony D. Methods to reduce prescribing errors in elderly  
 664 patients with multimorbidity. *Clinical interventions in aging*. 2016;11:857-66.  
 665 80. Cook JA, Burke-Miller JK, Jonikas JA, Aranda F, Santos A. Factors associated with 30-day  
 666 readmissions following medical hospitalizations among Medicaid beneficiaries with  
 667 schizophrenia, bipolar disorder, and major depressive disorder. *Psychiatry Research*.  
 668 2020;291:113168.

669

670 Table 1. Sociodemographic and hospitalisation data for inpatient stays by polymedicated, home-dwelling  
 671 adults aged 65 or more (n = 13,802)

| Variables                                            | Inpatient stays by polymedicated, home-dwelling adults aged 65 or more (n = 13,802) |
|------------------------------------------------------|-------------------------------------------------------------------------------------|
| Sex                                                  |                                                                                     |
| Stays by men (%)                                     | 7,834 (56.8)                                                                        |
| Stays by women (%)                                   | 5,968 (43.2)                                                                        |
| Age at discharge (years)                             |                                                                                     |
| Mean inpatient age at discharge (SD)                 | 77.77 (7.48)                                                                        |
| Min-Max                                              | 65-106                                                                              |
| Med [IQR 25-75]                                      | 77.00 [68.00-80.00]                                                                 |
| 65-69 (%)                                            | 2,226 (16.1)                                                                        |
| 70-79 (%)                                            | 5,811 (42.1)                                                                        |
| 80-89 (%)                                            | 4,845 (35.1)                                                                        |
| 90 and more (%)                                      | 920 (6.7)                                                                           |
| Year of discharge                                    |                                                                                     |
| 2015 (%)                                             | 3,501 (25.4)                                                                        |
| 2016 (%)                                             | 3,318 (24.0)                                                                        |
| 2017 (%)                                             | 3,530 (25.6)                                                                        |
| 2018 (%)                                             | 3,453 (25.0)                                                                        |
| Length of stay (days)                                |                                                                                     |
| Mean (SD)                                            | 8.44 (7.58)                                                                         |
| Min-Max                                              | 1-149                                                                               |
| Med [IQR 25-75]                                      | 7 [4-11]                                                                            |
| Number of ICDs-10                                    |                                                                                     |
| Mean (SD)                                            | 4.58 (0.92)                                                                         |
| Min-Max                                              | 1-5                                                                                 |
| Med [IQR 25-75]                                      | 5 [5-5]                                                                             |
| Principal ICD-10 diagnosis                           |                                                                                     |
| Circulatory (%)                                      | 3,336 (24.2)                                                                        |
| Infectious (%)                                       | 404 (2.9)                                                                           |
| Respiratory (%)                                      | 1,444 (10.5)                                                                        |
| Trauma (%)                                           | 1,043 (7.6)                                                                         |
| Tumours (%)                                          | 1,505 (10.9)                                                                        |
| Number of CHOP surgical procedures                   |                                                                                     |
| Mean (SD)                                            | 1.83 (1.76)                                                                         |
| Min-Max                                              | 0- 5                                                                                |
| Med [IQR 25-75]                                      | 1 [0-3]                                                                             |
| Number of medicines prescribed at hospital discharge |                                                                                     |
| Mean (SD)                                            | 8.95 (3.24)                                                                         |
| Min-Max                                              | 5-30                                                                                |
| Med [IQR 25-75]                                      | 8 [7.50-16.00]                                                                      |

672

673

674 Table 2. 30-day hospital readmission risks at different periods for different age groups (N = 13,802  
675 readmissions).

| Variables                                          | 30-day hospital readmission | p-value |
|----------------------------------------------------|-----------------------------|---------|
| Complete sample                                    | 7.8%                        |         |
| Sex                                                |                             | *       |
| Women vs men                                       | 7.3% vs 8.2%                |         |
| Year-end age, in years                             |                             | NS      |
| 65–69                                              | 7.5%                        |         |
| 70–79                                              | 7.6%                        |         |
| 80–89                                              | 8.4%                        |         |
| ≥ 90                                               | 6.4%                        |         |
| Mobility cluster:                                  |                             | NS      |
| Preserved mobility vs impaired mobility            | 7.6% vs 8.5%                |         |
| Activities in daily living (ADL):                  |                             | NS      |
| Full ADL ability vs impaired ADL                   | 7.8% vs 7.2%                |         |
| Cognitive status:                                  |                             | NS      |
| Preserved cognitive status vs cognitive impairment | 7.8% vs 7.9%                |         |
| ICD-10 diagnosis: circulatory problems             |                             | **      |
| No vs Yes                                          | 8.2% vs 6.5%                |         |
| ICD-10 diagnosis: infection                        |                             | NS      |
| No vs Yes                                          | 7.7% vs 9.9%                |         |
| ICD-10 diagnosis: respiratory problems             |                             | NS      |
| No vs Yes                                          | 7.8% vs 8.0%                |         |
| ICD-10 diagnosis: trauma                           |                             | **      |
| No vs Yes                                          | 8.0% vs 5.8%                |         |
| ICD-10 diagnosis: tumour                           |                             | ***     |
| No vs Yes                                          | 6.9% vs 15.1%               |         |
| Number of ICD-10 conditions                        |                             | ***     |
| 1                                                  | 1.5%                        |         |
| 2                                                  | 4.9%                        |         |
| 3                                                  | 3.6%                        |         |
| 4                                                  | 4.8%                        |         |
| 5                                                  | 8.8%                        |         |
| Number of surgical procedures (CHOP)               |                             | *       |
| 0                                                  | 7.7%                        |         |
| 1                                                  | 7.8%                        |         |
| 2                                                  | 7.0%                        |         |
| 3                                                  | 7.3%                        |         |
| 4                                                  | 7.1%                        |         |
| 5                                                  | 9.7%                        |         |
| Year of discharge: 2015–2018                       |                             | NS      |
| 2015                                               | 8.3%                        |         |
| 2016                                               | 8.0%                        |         |
| 2017                                               | 8.0%                        |         |
| 2018                                               | 6.8%                        |         |

676 Note. \* =  $p < 0.05$ ; \*\* =  $p < 0.01$ ; \*\*\* =  $p < 0.001$ ; NS = non-significant

677

678 Table 3. 30-day hospital readmissions for different classes of drugs based on the ATC (N = 13,802).

| Drug class                                                                | 30-day readmission with NO drugs in this class | 30-day readmission with drugs in this class | p-value |
|---------------------------------------------------------------------------|------------------------------------------------|---------------------------------------------|---------|
| <i>First level, anatomical main group</i>                                 |                                                |                                             |         |
| Blood and blood-forming organ drugs (B)                                   | 7.1%                                           | 8.0%                                        | NS      |
| Dermatologicals (D)                                                       | 7.7%                                           | 9.4%                                        | NS      |
| Genitourinary system and sex hormones (G)                                 | 7.7%                                           | 8.3%                                        | NS      |
| Systemic hormonal preparations, excluding sex hormones and insulins (H)   | 7.4%                                           | 9.5%                                        | ***     |
| Anti-infectives for systemic use (J)                                      | 8.0%                                           | 7.2%                                        | NS      |
| Antineoplastic and immunomodulating agents (L)                            | 7.6%                                           | 12.6%                                       | ***     |
| Drugs for the musculo-skeletal system (M)                                 | 8.0%                                           | 6.5%                                        | *       |
| Antiparasitic products, insecticides, and repellents (P)                  | 7.8%                                           | 6.6%                                        | ***     |
| Respiratory system drugs (R)                                              | 7.4%                                           | 9.9%                                        | ***     |
| Sensory organ drugs (S)                                                   | 7.8%                                           | 8.4%                                        | NS      |
| <i>Second level, therapeutic subgroup</i>                                 |                                                |                                             |         |
| Stomatological preparations (A01)                                         | 7.8%                                           | 12.2%                                       | NS      |
| Drugs for acid-related disorders (A02)                                    | 7.0%                                           | 8.5%                                        | ***     |
| Drugs for functional gastrointestinal disorders (A03)                     | 7.4%                                           | 13.4%                                       | ***     |
| Antiemetics and antinauseants (A04)                                       | 7.7%                                           | 27.7%                                       | ***     |
| Bile and liver therapy drugs (A05)                                        | 7.8%                                           | 14.3%                                       | NS      |
| Drugs for constipation (A06)                                              | 7.3%                                           | 10.8%                                       | ***     |
| Antidiarrhoeals, intestinal anti-inflammatory/anti-infective agents (A07) | 7.7%                                           | 12.9%                                       | ***     |
| Digestives, including enzymes (A09)                                       | 7.8%                                           | 10.0%                                       | NS      |
| Drugs used in diabetes (A10)                                              | 7.4%                                           | 9.5%                                        | ***     |
| Vitamins (A11)                                                            | 7.5%                                           | 9.9%                                        | ***     |
| Mineral supplements (A12)                                                 | 7.4%                                           | 8.8%                                        | **      |
| Other alimentary tract and metabolism products (A16)                      | 7.8%                                           | 6.3%                                        | NS      |
| Cardiac therapy (C01)                                                     | 7.6%                                           | 8.9%                                        | NS      |
| Antihypertensives (C02)                                                   | 7.7%                                           | 14.1%                                       | ***     |
| Diuretics (C03)                                                           | 7.2%                                           | 9.8%                                        | ***     |
| Peripheral vasodilators (C04)                                             | 7.8%                                           | 15.2%                                       | NS      |
| Vasoprotective drugs (C05)                                                | 7.8%                                           | 9.8%                                        | NS      |
| Beta-blocking agents (C07)                                                | 7.1%                                           | 8.6%                                        | ***     |
| Calcium channel blockers (C08)                                            | 7.7%                                           | 8.6%                                        | NS      |
| Agents acting on the renin-angiotensin system (C09)                       | 8.7%                                           | 7.1%                                        | ***     |
| Lipid-modifying agents (C10)                                              | 8.3%                                           | 7.1%                                        | **      |
| Anaesthetics (N01)                                                        | 7.8%                                           | 18.8%                                       | *       |
| Analgesics (N02)                                                          | 7.8%                                           | 7.8%                                        | NS      |
| Antiepileptics (N03)                                                      | 7.7%                                           | 9.0%                                        | NS      |
| Drugs for Parkinson's disease (N04)                                       | 7.8%                                           | 6.9%                                        | NS      |
| Psycholeptics (N05)                                                       | 6.8%                                           | 9.3%                                        | ***     |
| Psychoanaleptics (N06)                                                    | 7.8%                                           | 7.7%                                        | NS      |
| Other nervous system drugs (N07)                                          | 7.9%                                           | 5.1%                                        | NS      |

679 Note. \* =  $p < 0.05$ ; \*\* =  $p < 0.01$ ; \*\*\* =  $p < 0.001$ ; NS = non-significant

680

681 Table 4. Baseline, multilevel, logistic regression model using 30-day readmission (0 = no; 1 = yes) as the  
 682 dependent variable associated with independent sociodemographic, LOS, and clinical variables  
 683 (N = 13,802 observations for 8,878 different inpatients readmitted to hospital).

| Variables                                                 | Odds Ratio <sup>3</sup> | P > z | 95% CI <sup>4</sup> |
|-----------------------------------------------------------|-------------------------|-------|---------------------|
| Sex                                                       | 1.079                   | 0.285 | 0.938–1.242         |
| Year-end age, in years                                    | 0.999                   | 0.878 | 0.990–1.009         |
| Hospital length of stay (LOS), in days                    | 1.014                   | 0.000 | 1.006–1.021         |
| Mobility cluster <sup>1</sup>                             | 1.218                   | 0.015 | 1.039–1.427         |
| Dependency in the activities of daily living <sup>1</sup> | 0.794                   | 0.248 | 0.537–1.174         |
| Mental health status <sup>1</sup>                         | 0.992                   | 0.966 | 0.687–1.433         |
| CIM 1 diagnosis: circulatory problems <sup>2</sup>        | 0.938                   | 0.491 | 0.783–1.124         |
| CIM 1 diagnosis: infection <sup>2</sup>                   | 1.381                   | 0.078 | 0.964–1.977         |
| CIM 1 diagnosis: respiratory problems <sup>2</sup>        | 1.100                   | 0.414 | 0.875–1.382         |
| CIM 1 diagnosis: trauma <sup>2</sup>                      | 0.847                   | 0.265 | 0.633–1.134         |
| CIM 1 diagnosis: tumour <sup>2</sup>                      | 2.538                   | 0.000 | 2.089–3.082         |
| Number of CIM                                             | 1.419                   | 0.000 | 1.282–1.572         |
| Number of CHOP                                            | 0.978                   | 0.304 | 0.938–1.020         |
| Number of drugs                                           | 1.043                   | 0.000 | 1.028–1.058         |
| Year: 2015 to 2018                                        | 0.933                   | 0.022 | 0.880–0.990         |
| Intercept                                                 | .                       | 0.027 | .                   |

684 Note. 1: 0 = good state, 1 = impairment; 2: 0 = no, 1 = yes; 3: adjusted Odds ratio; 4:

685

686

687

688 Table 5. Multilevel logistic regression model results for the drugs prescribed to older patients at discharge  
 689 home that had significant predictive values (odds ratios) for 30-day hospital readmission (controlled for  
 690 variables in the baseline model: Table 4) (N = 13,802 observations for 8,878 different inpatients  
 691 readmitted to hospital).

692

| Variables                                                               | Odds ratio <sup>1</sup> | p > z | 95% CI <sup>2</sup> |
|-------------------------------------------------------------------------|-------------------------|-------|---------------------|
| <i>First level, anatomical main group</i>                               |                         |       |                     |
| Blood and blood-forming organs drugs (B)                                | 1.089                   | 0.041 | 1.003–1.181         |
| Systemic hormonal preparations, excluding sex hormones and insulins (H) | 1.207                   | 0.007 | 1.052–1.385         |
| Respiratory system drugs (R)                                            | 1.146                   | 0.003 | 1.046–1.254         |
| <i>Second level, therapeutic subgroup</i>                               |                         |       |                     |
| Drugs for functional gastrointestinal disorders (A03)                   | 1.424                   | 0.001 | 1.166–1.739         |
| Antiemetics and antinauseants (A04)                                     | 3.216                   | 0.000 | 1.842–5.617         |
| Drugs for constipation (A06)                                            | 1.195                   | 0.018 | 1.031–1.386         |
| Drugs used in diabetes (A10)                                            | 1.125                   | 0.021 | 1.018–1.243         |
| Vitamins (A11)                                                          | 1.201                   | 0.008 | 1.049–1.374         |
| Antihypertensives (C02)                                                 | 1.771                   | 0.000 | 1.287–2.438         |

|                              |       |       |             |
|------------------------------|-------|-------|-------------|
| Diuretics (C03)              | 1.149 | 0.024 | 1.018–1.296 |
| Beta-blocking agents (C07)   | 1.156 | 0.040 | 1.007–1.327 |
| Lipid-modifying agents (C10) | 0.841 | 0.015 | 0.732–0.967 |
| Psycholeptics (N05)          | 1.130 | 0.009 | 1.031–1.238 |

Note. 1 = adjusted odds ratio; 2 = CI or Confidence Interval

Table 6. Drugs and drugs interactions from ATC classes A and B with a significant risk of 30-day hospital readmission (controlled for variables in the baseline model: Table 4) (N = 13,802 observations for 8,878 different inpatients readmitted to hospital).

| Variables                                                               | Odds ratio <sup>1</sup> | <i>p</i> > <i>z</i> | 95% CI <sup>2</sup> |
|-------------------------------------------------------------------------|-------------------------|---------------------|---------------------|
| <i>First level, anatomical main group</i>                               |                         |                     |                     |
| Blood and blood-forming organ drugs (B)                                 | 1.089                   | 0.040               | 1.004–1.182         |
| Systemic hormonal preparations, excluding sex hormones and insulins (H) | 1.210                   | 0.007               | 1.054–1.390         |
| Respiratory system drugs (R)                                            | 1.149                   | 0.003               | 1.049–1.258         |
| <i>Second level, therapeutic subgroup</i>                               |                         |                     |                     |
| Antiemetics and antinauseants (A04)                                     | 3.222                   | 0.000               | 1.844–5.630         |
| Drugs for functional gastrointestinal disorders (A03)                   | 1.428                   | 0.000               | 1.169–1744          |
| Beta-blocking agents (C07) and drugs for acid-related disorders (A02)   | 1.367                   | 0.022               | 1.046–1.788         |
| Drugs for constipation (A06)                                            | 1.199                   | 0.017               | 1.033–1.392         |
| Agents acting on the renin-angiotensin system (C09)                     | 0.892                   | 0.049               | 0.796–0.999         |
| Lipid-modifying agents (C10)                                            | 0.838                   | 0.013               | 0.729–0.964         |

Note. 1: adjusted odds ratio; 2: CI = Confidence Interval

1  
2  
3  
4  
5  
6  
7  
8  
9  
10  
11  
12  
13  
14  
15  
16  
17  
18  
19  
20  
21

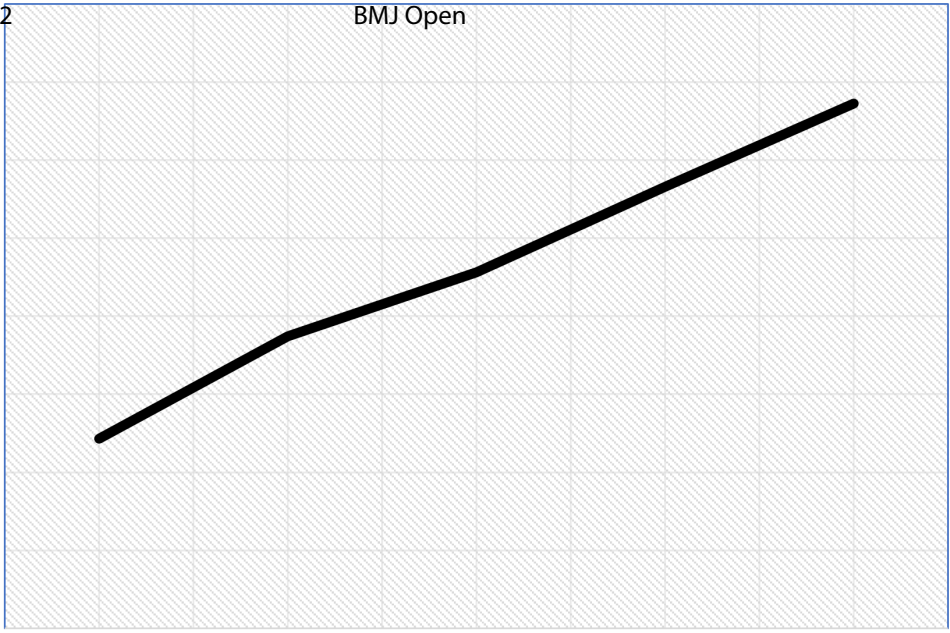

For peer review only - <http://bmjopen.bmj.com/site/about/guidelines.xhtml>

Number of prescribed drugs



Supplementary table. Descriptive statistics of drugs prescribed per hospital stays (N = 13,802 readmissions) at discharge based on the ATC Classification System.

| <b>Drug classes based on the ATC Classification System</b>                | <b>Min-Max</b> | <b>Mean (SD)</b>   |
|---------------------------------------------------------------------------|----------------|--------------------|
| <i>First level, anatomical main group</i>                                 |                |                    |
| Blood and blood forming organs (B)                                        | 0–5            | 1.15 (0.86)        |
| Dermatologicals (D)                                                       | 0–3            | 0.04 (0.21)        |
| Genitourinary system and sex hormones (G)                                 | 0–4            | 0.21 (0.47)        |
| Systemic hormonal preparations, excl. sex hormones and insulins (H)       | 0–4            | 0.20 (0.46)        |
| Anti-infectives for systemic use (J)                                      | 0–4            | 0.24 (0.47)        |
| Antineoplastic and immunomodulating agents (L)                            | 0–5            | 0.05 (0.23)        |
| Musculo-skeletal system (M)                                               | 0–3            | 0.15 (0.39)        |
| Antiparasitic products, insecticides and repellents (P)                   | 0–2            | 0.02 (0.13)        |
| Respiratory system (R)                                                    | 0–7            | 0.28 (0.72)        |
| Sensory organs (S)                                                        | 0–6            | 0.10 (0.39)        |
| <i>Second level, therapeutic subgroup</i>                                 |                |                    |
| Stomatological preparations (A01)                                         | 0–1            | 0.00 (0.06)        |
| Drugs for acid-related disorders (A02)                                    | 0–3            | 0.56 (0.52)        |
| Drugs for functional gastrointestinal disorders (A03)                     | 0–3            | 0.07 (0.28)        |
| Antiemetics and anti-nauseants (A04)                                      | 0–1            | 0.01 (0.08)        |
| Bile and liver therapy (A05)                                              | 0–1            | 0.00 (0.05)        |
| Drugs for constipation (A06)                                              | 0–3            | 0.15 (0.40)        |
| Antidiarrhoeals, intestinal anti-inflammatory/anti-infective agents (A07) | 0–2            | 0.03 (0.18)        |
| Digestives, incl. Enzymes (A09)                                           | 0–2            | 0.02 (0.13)        |
| Drugs used in diabetes (A10)                                              | 0–5            | 0.26 (0.63)        |
| Vitamins (A11)                                                            | 0–4            | 0.15 (0.44)        |
| Mineral supplements (A12)                                                 | 0–3            | 0.29 (0.51)        |
| Other alimentary tract and metabolism products (A16)                      | 0–1            | 0.00 (0.05)        |
| Cardiac therapy drugs (C01)                                               | 0–4            | 0.14 (0.42)        |
| Antihypertensives (C02)                                                   | 0–2            | 0.02 (0.17)        |
| Diuretics (C03)                                                           | 0–3            | 0.27 (0.53)        |
| Peripheral vasodilators (C04)                                             | 0–1            | 0.00 (0.06)        |
| Vasoprotectives (C05)                                                     | 0–3            | 0.02 (0.14)        |
| Beta-blocking agents (C07)                                                | 0–2            | 0.46 (0.51)        |
| Calcium channel blockers (C08)                                            | 0–2            | 0.16 (0.37)        |
| Agents acting on the renin-angiotensin system (C09)                       | 0–3            | 0.64 (0.62)        |
| Lipid modifying agents (C10)                                              | 0–3            | 0.43 (0.52)        |
| Anaesthetics (N01)                                                        | 0–1            | 0.00 (0.05)        |
| Analgesics (N02)                                                          | 0–7            | 1.02 (0.91)        |
| Antiepileptics (N03)                                                      | 0–5            | 0.11 (0.35)        |
| Drugs for Parkinson's disease (N04)                                       | 0–5            | 0.04 (0.24)        |
| Psycholeptics (N05)                                                       | 0–6            | 0.53 (0.73)        |
| Psychoanaleptics (N06)                                                    | 0–3            | 0.20 (0.44)        |
| Other nervous system drugs (N07)                                          | 0–3            | 0.03 (0.19)        |
| <b>Total number of drugs</b>                                              | <b>5–30</b>    | <b>8.95 (3.24)</b> |

**The RECORD statement – checklist of items, extended from the STROBE statement, that should be reported in observational studies using routinely collected health data.**

|                           | Item No. | STROBE items                                                                                                                                                                               | Location in manuscript where items are reported | RECORD items                                                                                                                                                                                                                                                                                                                                                                                                                                | Location in manuscript where items are reported                                                                 |
|---------------------------|----------|--------------------------------------------------------------------------------------------------------------------------------------------------------------------------------------------|-------------------------------------------------|---------------------------------------------------------------------------------------------------------------------------------------------------------------------------------------------------------------------------------------------------------------------------------------------------------------------------------------------------------------------------------------------------------------------------------------------|-----------------------------------------------------------------------------------------------------------------|
| <b>Title and abstract</b> |          |                                                                                                                                                                                            |                                                 |                                                                                                                                                                                                                                                                                                                                                                                                                                             |                                                                                                                 |
|                           | 1        | (a) Indicate the study's design with a commonly used term in the title or the abstract (b) Provide in the abstract an informative and balanced summary of what was done and what was found |                                                 | RECORD 1.1: The type of data used should be specified in the title or abstract. When possible, the name of the databases used should be included.<br><br>RECORD 1.2: If applicable, the geographic region and timeframe within which the study took place should be reported in the title or abstract.<br><br>RECORD 1.3: If linkage between databases was conducted for the study, this should be clearly stated in the title or abstract. | Title Abstract (lines 2-8)<br><br>Line 6<br><br>Lines 118-121<br><br>Not applicable, only one hospital register |
| <b>Introduction</b>       |          |                                                                                                                                                                                            |                                                 |                                                                                                                                                                                                                                                                                                                                                                                                                                             |                                                                                                                 |
| Background rationale      | 2        | Explain the scientific background and rationale for the investigation being reported                                                                                                       |                                                 |                                                                                                                                                                                                                                                                                                                                                                                                                                             | Lines 39-101                                                                                                    |
| Objectives                | 3        | State specific objectives, including any prespecified hypotheses                                                                                                                           |                                                 |                                                                                                                                                                                                                                                                                                                                                                                                                                             | Lines 101-107                                                                                                   |
| <b>Methods</b>            |          |                                                                                                                                                                                            |                                                 |                                                                                                                                                                                                                                                                                                                                                                                                                                             |                                                                                                                 |
| Study Design              | 4        | Present key elements of study design early in the paper                                                                                                                                    |                                                 |                                                                                                                                                                                                                                                                                                                                                                                                                                             | Lines 110-114                                                                                                   |
| Setting                   | 5        | Describe the setting, locations, and relevant dates, including periods of recruitment, exposure, follow-up, and data collection                                                            |                                                 |                                                                                                                                                                                                                                                                                                                                                                                                                                             | Lines 117-133                                                                                                   |

|                              |   |                                                                                                                                                                                                                                                                                                                                                                                                                                                                                                                                                                                                                                                                                                                              |  |                                                                                                                                                                                                                                                                                                                                                                                                                                                                                                                                                                                                                                                                                                      |                                                                                                                                                                                                                                                                                                          |
|------------------------------|---|------------------------------------------------------------------------------------------------------------------------------------------------------------------------------------------------------------------------------------------------------------------------------------------------------------------------------------------------------------------------------------------------------------------------------------------------------------------------------------------------------------------------------------------------------------------------------------------------------------------------------------------------------------------------------------------------------------------------------|--|------------------------------------------------------------------------------------------------------------------------------------------------------------------------------------------------------------------------------------------------------------------------------------------------------------------------------------------------------------------------------------------------------------------------------------------------------------------------------------------------------------------------------------------------------------------------------------------------------------------------------------------------------------------------------------------------------|----------------------------------------------------------------------------------------------------------------------------------------------------------------------------------------------------------------------------------------------------------------------------------------------------------|
| Participants                 | 6 | <p>(a) <i>Cohort study</i> - Give the eligibility criteria, and the sources and methods of selection of participants. Describe methods of follow-up</p> <p><i>Case-control study</i> - Give the eligibility criteria, and the sources and methods of case ascertainment and control selection. Give the rationale for the choice of cases and controls</p> <p><i>Cross-sectional study</i> - Give the eligibility criteria, and the sources and methods of selection of participants</p> <p>(b) <i>Cohort study</i> - For matched studies, give matching criteria and number of exposed and unexposed</p> <p><i>Case-control study</i> - For matched studies, give matching criteria and the number of controls per case</p> |  | <p>RECORD 6.1: The methods of study population selection (such as codes or algorithms used to identify subjects) should be listed in detail. If this is not possible, an explanation should be provided.</p> <p>RECORD 6.2: Any validation studies of the codes or algorithms used to select the population should be referenced. If validation was conducted for this study and not published elsewhere, detailed methods and results should be provided.</p> <p>RECORD 6.3: If the study involved linkage of databases, consider use of a flow diagram or other graphical display to demonstrate the data linkage process, including the number of individuals with linked data at each stage.</p> | <p>in press/<br/>forthcoming<br/>JMIR article:<br/><a href="https://www.ncbi.nlm.nih.gov/pubmed/management/validator/909A44E74F70/citations/?start=0">https://www.ncbi.nlm.nih.gov/pubmed/management/validator/909A44E74F70/citations/?start=0</a></p> <p>Not applicable, only one hospital register</p> |
| Variables                    | 7 | Clearly define all outcomes, exposures, predictors, potential confounders, and effect modifiers. Give diagnostic criteria, if applicable.                                                                                                                                                                                                                                                                                                                                                                                                                                                                                                                                                                                    |  | RECORD 7.1: A complete list of codes and algorithms used to classify exposures, outcomes, confounders, and effect modifiers should be provided. If these cannot be reported, an explanation should be provided.                                                                                                                                                                                                                                                                                                                                                                                                                                                                                      | Lines 152-177 and<br>in press/<br>forthcoming<br>JMIR article:<br><a href="https://www.ncbi.nlm.nih.gov/pubmed/management/validator/909A44E74F70/citations/?start=0">https://www.ncbi.nlm.nih.gov/pubmed/management/validator/909A44E74F70/citations/?start=0</a>                                        |
| Data sources/<br>measurement | 8 | For each variable of interest, give sources of data and details                                                                                                                                                                                                                                                                                                                                                                                                                                                                                                                                                                                                                                                              |  |                                                                                                                                                                                                                                                                                                                                                                                                                                                                                                                                                                                                                                                                                                      | Lines 122-128 and                                                                                                                                                                                                                                                                                        |

|                        |    |                                                                                                                               |  |  |                                                                                                                                                                                                                                                                |
|------------------------|----|-------------------------------------------------------------------------------------------------------------------------------|--|--|----------------------------------------------------------------------------------------------------------------------------------------------------------------------------------------------------------------------------------------------------------------|
|                        |    | of methods of assessment (measurement). Describe comparability of assessment methods if there is more than one group          |  |  | in press/ forthcoming<br>JMIR article:<br><a href="https://www.ncbi.nlm.nih.gov/pubmed/management/validator/909A44E74F70/citations/?start=0">https://www.ncbi.nlm.nih.gov/pubmed/management/validator/909A44E74F70/citations/?start=0</a>                      |
| Bias                   | 9  | Describe any efforts to address potential sources of bias                                                                     |  |  | Lines 180-200 and<br>in press/ forthcoming<br>JMIR article:<br><a href="https://www.ncbi.nlm.nih.gov/pubmed/management/validator/909A44E74F70/citations/?start=0">https://www.ncbi.nlm.nih.gov/pubmed/management/validator/909A44E74F70/citations/?start=0</a> |
| Study size             | 10 | Explain how the study size was arrived at                                                                                     |  |  | Lines 141-144                                                                                                                                                                                                                                                  |
| Quantitative variables | 11 | Explain how quantitative variables were handled in the analyses. If applicable, describe which groupings were chosen, and why |  |  | Lines 139-150 and<br>in press/ forthcoming<br>JMIR article:<br><a href="https://www.ncbi.nlm.nih.gov/pubmed/management/validator/909A44E74F70/citations/?start=0">https://www.ncbi.nlm.nih.gov/pubmed/management/validator/909A44E74F70/citations/?start=0</a> |

1  
2  
3  
4  
5  
6  
7  
8  
9  
10  
11  
12  
13  
14  
15  
16  
17  
18  
19  
20  
21  
22  
23  
24  
25  
26  
27  
28  
29  
30  
31  
32  
33  
34  
35  
36  
37  
38  
39  
40  
41  
42  
43  
44  
45  
46  
47

|                                  |    |                                                                                                                                                                                                                                                                                                                                                                                                                                                                                                                                                                                                     |  |                                                                                                                                                                                                                                                                     |                                                                                                                                                                                                                                                             |
|----------------------------------|----|-----------------------------------------------------------------------------------------------------------------------------------------------------------------------------------------------------------------------------------------------------------------------------------------------------------------------------------------------------------------------------------------------------------------------------------------------------------------------------------------------------------------------------------------------------------------------------------------------------|--|---------------------------------------------------------------------------------------------------------------------------------------------------------------------------------------------------------------------------------------------------------------------|-------------------------------------------------------------------------------------------------------------------------------------------------------------------------------------------------------------------------------------------------------------|
| Statistical methods              | 12 | <p>(a) Describe all statistical methods, including those used to control for confounding</p> <p>(b) Describe any methods used to examine subgroups and interactions</p> <p>(c) Explain how missing data were addressed</p> <p>(d) <i>Cohort study</i> - If applicable, explain how loss to follow-up was addressed</p> <p><i>Case-control study</i> - If applicable, explain how matching of cases and controls was addressed</p> <p><i>Cross-sectional study</i> - If applicable, describe analytical methods taking account of sampling strategy</p> <p>(e) Describe any sensitivity analyses</p> |  |                                                                                                                                                                                                                                                                     | Lines 180-200                                                                                                                                                                                                                                               |
| Data access and cleaning methods | .. |                                                                                                                                                                                                                                                                                                                                                                                                                                                                                                                                                                                                     |  | <p>RECORD 12.1: Authors should describe the extent to which the investigators had access to the database population used to create the study population.</p> <p>RECORD 12.2: Authors should provide information on the data cleaning methods used in the study.</p> | <p>Lines 118-122 and in press/forthcoming JMIR article: <a href="https://www.ncbi.nlm.nih.gov/pubmed/management/validator/909A44E74F70/citations/?start=0">https://www.ncbi.nlm.nih.gov/pubmed/management/validator/909A44E74F70/citations/?start=0</a></p> |
| Linkage                          | .. |                                                                                                                                                                                                                                                                                                                                                                                                                                                                                                                                                                                                     |  | <p>RECORD 12.3: State whether the study included person-level, institutional-level, or other data linkage across two or more databases. The methods of linkage and methods of</p>                                                                                   | <p>in press/forthcoming JMIR article: <a href="https://www.ncbi.nlm.nih.gov/pubmed/">https://www.ncbi.nlm.nih.gov/pubmed/</a></p>                                                                                                                           |

|                  |    |                                                                                                                                                                                                                                                                                                                                                 |  |                                                                                                                                                                                                                                                                                                                    |                                                                                                                                                            |
|------------------|----|-------------------------------------------------------------------------------------------------------------------------------------------------------------------------------------------------------------------------------------------------------------------------------------------------------------------------------------------------|--|--------------------------------------------------------------------------------------------------------------------------------------------------------------------------------------------------------------------------------------------------------------------------------------------------------------------|------------------------------------------------------------------------------------------------------------------------------------------------------------|
|                  |    |                                                                                                                                                                                                                                                                                                                                                 |  | linkage quality evaluation should be provided.                                                                                                                                                                                                                                                                     | <a href="https://pubmed.ncbi.nlm.nih.gov/management/validator/909A44E74F70/citations/?start=0">ed/management/validator/909A44E74F70/citations/?start=0</a> |
| <b>Results</b>   |    |                                                                                                                                                                                                                                                                                                                                                 |  |                                                                                                                                                                                                                                                                                                                    |                                                                                                                                                            |
| Participants     | 13 | (a) Report the numbers of individuals at each stage of the study ( <i>e.g.</i> , numbers potentially eligible, examined for eligibility, confirmed eligible, included in the study, completing follow-up, and analysed)<br>(b) Give reasons for non-participation at each stage.<br>(c) Consider use of a flow diagram                          |  | RECORD 13.1: Describe in detail the selection of the persons included in the study ( <i>i.e.</i> , study population selection) including filtering based on data quality, data availability and linkage. The selection of included persons can be described in the text and/or by means of the study flow diagram. | Lines 142-143                                                                                                                                              |
| Descriptive data | 14 | (a) Give characteristics of study participants ( <i>e.g.</i> , demographic, clinical, social) and information on exposures and potential confounders<br>(b) Indicate the number of participants with missing data for each variable of interest<br>(c) <i>Cohort study</i> - summarise follow-up time ( <i>e.g.</i> , average and total amount) |  |                                                                                                                                                                                                                                                                                                                    | Lines 152-177                                                                                                                                              |
| Outcome data     | 15 | <i>Cohort study</i> - Report numbers of outcome events or summary measures over time<br><i>Case-control study</i> - Report numbers in each exposure category, or summary measures of exposure<br><i>Cross-sectional study</i> - Report numbers of outcome events or summary measures                                                            |  |                                                                                                                                                                                                                                                                                                                    | Lines 142-144                                                                                                                                              |

1  
2  
3  
4  
5  
6  
7  
8  
9  
10  
11  
12  
13  
14  
15  
16  
17  
18  
19  
20  
21  
22  
23  
24  
25  
26  
27  
28  
29  
30  
31  
32  
33  
34  
35  
36  
37  
38  
39  
40  
41  
42  
43  
44  
45  
46  
47



|                                                                               |                   |    |                                                                                                                                                                                                                                                                                                                                                                                                                 |  |                                                                                                                                                                                                                                                                                                          |               |
|-------------------------------------------------------------------------------|-------------------|----|-----------------------------------------------------------------------------------------------------------------------------------------------------------------------------------------------------------------------------------------------------------------------------------------------------------------------------------------------------------------------------------------------------------------|--|----------------------------------------------------------------------------------------------------------------------------------------------------------------------------------------------------------------------------------------------------------------------------------------------------------|---------------|
| 1<br>2<br>3<br>4<br>5<br>6<br>7<br>8<br>9<br>10<br>11<br>12<br>13<br>14<br>15 | Main results      | 16 | (a) Give unadjusted estimates and, if applicable, confounder-adjusted estimates and their precision (e.g., 95% confidence interval). Make clear which confounders were adjusted for and why they were included<br>(b) Report category boundaries when continuous variables were categorized<br>(c) If relevant, consider translating estimates of relative risk into absolute risk for a meaningful time period |  |                                                                                                                                                                                                                                                                                                          | Lines 207-285 |
| 16<br>17<br>18<br>19<br>20                                                    | Other analyses    | 17 | Report other analyses done—e.g., analyses of subgroups and interactions, and sensitivity analyses                                                                                                                                                                                                                                                                                                               |  |                                                                                                                                                                                                                                                                                                          | Lines 207-285 |
| 21                                                                            | <b>Discussion</b> |    |                                                                                                                                                                                                                                                                                                                                                                                                                 |  |                                                                                                                                                                                                                                                                                                          |               |
| 22<br>23<br>24                                                                | Key results       | 18 | Summarise key results with reference to study objectives                                                                                                                                                                                                                                                                                                                                                        |  |                                                                                                                                                                                                                                                                                                          | Lines 289-294 |
| 25<br>26<br>27<br>28<br>29<br>30<br>31<br>32<br>33<br>34                      | Limitations       | 19 | Discuss limitations of the study, taking into account sources of potential bias or imprecision. Discuss both direction and magnitude of any potential bias                                                                                                                                                                                                                                                      |  | RECORD 19.1: Discuss the implications of using data that were not created or collected to answer the specific research question(s). Include discussion of misclassification bias, unmeasured confounding, missing data, and changing eligibility over time, as they pertain to the study being reported. | Lines 369-378 |
| 35<br>36<br>37<br>38<br>39<br>40<br>41<br>42<br>43<br>44                      | Interpretation    | 20 | Give a cautious overall interpretation of results considering objectives, limitations, multiplicity of analyses, results from similar studies, and other relevant evidence                                                                                                                                                                                                                                      |  |                                                                                                                                                                                                                                                                                                          | Lines 294-361 |

45  
46  
47

|                                                                      |                                                           |    |                                                                                                                                                               |                                                                                                                                                          |                                                                                                                                                                                                                                              |
|----------------------------------------------------------------------|-----------------------------------------------------------|----|---------------------------------------------------------------------------------------------------------------------------------------------------------------|----------------------------------------------------------------------------------------------------------------------------------------------------------|----------------------------------------------------------------------------------------------------------------------------------------------------------------------------------------------------------------------------------------------|
| 1<br>2<br>3                                                          | Generalisability                                          | 21 | Discuss the generalisability (external validity) of the study results                                                                                         |                                                                                                                                                          | Lines 349-355                                                                                                                                                                                                                                |
| 4                                                                    | <b>Other Information</b>                                  |    |                                                                                                                                                               |                                                                                                                                                          |                                                                                                                                                                                                                                              |
| 5<br>6<br>7<br>8<br>9                                                | Funding                                                   | 22 | Give the source of funding and the role of the funders for the present study and, if applicable, for the original study on which the present article is based |                                                                                                                                                          | Line 399                                                                                                                                                                                                                                     |
| 10<br>11<br>12<br>13<br>14<br>15<br>16<br>17<br>18<br>19<br>20<br>21 | Accessibility of protocol, raw data, and programming code |    | ..                                                                                                                                                            | RECORD 22.1: Authors should provide information on how to access any supplemental information such as the study protocol, raw data, or programming code. | in press/<br>forthcoming<br>JMIR article:<br><a href="https://www.ncbi.nlm.nih.gov/pubmed/management/validator/909A44E74F70/citations/?start=0">https://www.ncbi.nlm.nih.gov/pubmed/management/validator/909A44E74F70/citations/?start=0</a> |

\*Reference: Benchimol EI, Smeeth L, Guttman A, Harron K, Moher D, Petersen I, Sørensen HT, von Elm E, Langan SM, the RECORD Working Committee. The REporting of studies Conducted using Observational Routinely-collected health Data (RECORD) Statement. *PLoS Medicine* 2015; in press.

\*Checklist is protected under Creative Commons Attribution ([CC BY](https://creativecommons.org/licenses/by/4.0/)) license.
