# Supplementary material for: Risk of 30-day hospital readmission associated with medical conditions and drug regimens of polymedicated, older inpatients discharged home: a registry-based cohort study
Source: PubMed Central journal article supplement (PMC8281082; doi:10.1136/bmjopen-2021-052755), 2021-07-14
Supplement: bmjopen-2021-052755supp001.pdf [file bmjopen-2021-052755supp001.pdf]

Supplementary table. Descriptive statistics of drugs prescribed per hospital stays (N = 13,802) at discharge based on the ATC Classification System.

| <b>Drug classes based on the ATC Classification System</b>                | <b>Min-Max</b> | <b>Mean (SD)</b>   |
|---------------------------------------------------------------------------|----------------|--------------------|
| <i>First level, anatomical main group</i>                                 |                |                    |
| Blood and blood forming organs (B)                                        | 0–5            | 1.15 (0.86)        |
| Dermatologicals (D)                                                       | 0–3            | 0.04 (0.21)        |
| Genitourinary system and sex hormones (G)                                 | 0–4            | 0.21 (0.47)        |
| Systemic hormonal preparations, excl. sex hormones and insulins (H)       | 0–4            | 0.20 (0.46)        |
| Anti-infectives for systemic use (J)                                      | 0–4            | 0.24 (0.47)        |
| Antineoplastic and immunomodulating agents (L)                            | 0–5            | 0.05 (0.23)        |
| Musculo-skeletal system (M)                                               | 0–3            | 0.15 (0.39)        |
| Antiparasitic products, insecticides and repellents (P)                   | 0–2            | 0.02 (0.13)        |
| Respiratory system (R)                                                    | 0–7            | 0.28 (0.72)        |
| Sensory organs (S)                                                        | 0–6            | 0.10 (0.39)        |
| <i>Second level, therapeutic subgroup</i>                                 |                |                    |
| Stomatological preparations (A01)                                         | 0–1            | 0.00 (0.06)        |
| Drugs for acid-related disorders (A02)                                    | 0–3            | 0.56 (0.52)        |
| Drugs for functional gastrointestinal disorders (A03)                     | 0–3            | 0.07 (0.28)        |
| Antiemetics and anti-nauseants (A04)                                      | 0–1            | 0.01 (0.08)        |
| Bile and liver therapy (A05)                                              | 0–1            | 0.00 (0.05)        |
| Drugs for constipation (A06)                                              | 0–3            | 0.15 (0.40)        |
| Antidiarrhoeals, intestinal anti-inflammatory/anti-infective agents (A07) | 0–2            | 0.03 (0.18)        |
| Digestives, incl. Enzymes (A09)                                           | 0–2            | 0.02 (0.13)        |
| Drugs used in diabetes (A10)                                              | 0–5            | 0.26 (0.63)        |
| Vitamins (A11)                                                            | 0–4            | 0.15 (0.44)        |
| Mineral supplements (A12)                                                 | 0–3            | 0.29 (0.51)        |
| Other alimentary tract and metabolism products (A16)                      | 0–1            | 0.00 (0.05)        |
| Cardiac therapy drugs (C01)                                               | 0–4            | 0.14 (0.42)        |
| Antihypertensives (C02)                                                   | 0–2            | 0.02 (0.17)        |
| Diuretics (C03)                                                           | 0–3            | 0.27 (0.53)        |
| Peripheral vasodilators (C04)                                             | 0–1            | 0.00 (0.06)        |
| Vasoprotectives (C05)                                                     | 0–3            | 0.02 (0.14)        |
| Beta-blocking agents (C07)                                                | 0–2            | 0.46 (0.51)        |
| Calcium channel blockers (C08)                                            | 0–2            | 0.16 (0.37)        |
| Agents acting on the renin-angiotensin system (C09)                       | 0–3            | 0.64 (0.62)        |
| Lipid modifying agents (C10)                                              | 0–3            | 0.43 (0.52)        |
| Anaesthetics (N01)                                                        | 0–1            | 0.00 (0.05)        |
| Analgesics (N02)                                                          | 0–7            | 1.02 (0.91)        |
| Antiepileptics (N03)                                                      | 0–5            | 0.11 (0.35)        |
| Drugs for Parkinson's disease (N04)                                       | 0–5            | 0.04 (0.24)        |
| Psycholeptics (N05)                                                       | 0–6            | 0.53 (0.73)        |
| Psychoanaleptics (N06)                                                    | 0–3            | 0.20 (0.44)        |
| Other nervous system drugs (N07)                                          | 0–3            | 0.03 (0.19)        |
| <b>Total number of drugs</b>                                              | <b>5–30</b>    | <b>8.95 (3.24)</b> |
